# Supplementary material for: Synthesis of fully-substituted pyridines and dihydropyridines in a highly chemoselective manner utilizing a multicomponent reaction (MCR) strategy
Source: Royal Society of Chemistry journal article supplement (doi:10.1039/c4ra08237k), 2014-01-01

## Supporting Informations

Satavisha Sarkar, Deb K. Das and Abu T. Khan\*

*Department of Chemistry, Indian Institute of Technology Guwahati*

Tel.: +91 361 2582305; fax: +91 361 2582349.

E-mail address: atk@iitg.ernet.in (A.T. Khan).

### Contents:

1. Instrumentation and Chemicals
2. Crystallographic description.
3. Spectra of all compounds

### Instrumentation and Chemicals

All the reagents were commercial grade and purified according to the established procedures. Organic extracts were dried over anhydrous sodium sulfate. Solvents were removed in a rotary evaporator under reduced pressure. Silica gel (60-120 mesh size) was used for the column chromatography. Reactions were monitored by TLC on silica gel 60 F<sub>254</sub> (0.25mm). Melting points were recorded on melting point apparatus and are uncorrected. IR spectra were recorded on IR spectrophotometer. NMR spectra were recorded in CDCl<sub>3</sub> with tetramethylsilane as the internal standard for <sup>1</sup>H NMR (400 MHz) CDCl<sub>3</sub> solvent as the internal standard for <sup>13</sup>C NMR (100 MHz.) MS spectra were recorded using ESI mode. IR spectra were recorded in KBr or neat. <sup>1</sup>H and <sup>13</sup>C NMR spectra were recorded on Varian 400 and Bruker 600 spectrometer by using TMS as internal reference; chemical shifts ( $\delta$  scale) are reported in parts per million (ppm).

Elemental analyses were carried out using analyzer. Column chromatographic separations were performed using Merck silica gel (60-120 mesh).

### Crystallographic Description

Crystal data were collected with Bruker Smart Apex-II CCD diffractometer using graphite monochromated MoK $\alpha$  radiation ( $\lambda = 0.71073 \text{ \AA}$ ) at 298 K. Cell parameters were retrieved using SMART software and refined with SAINT on all observed reflections. Data reduction was performed with the SAINT software and corrected for Lorentz and polarization effects. Absorption corrections were applied with the program SADABS. The structure was solved by direct methods implemented in SHELX-97 program and refined by full-matrix least-squares methods on F<sup>2</sup>. All non-hydrogen atomic positions were located in difference Fourier maps and refined anisotropically. The hydrogen atoms were placed in their geometrically generated positions.

Table S1. Crystal data and structure refinement for **4a** and **6d**. For atomic coordinates and equivalent isotropic displacement parameters and bond angles, please check the CIF.

|                     | Compound (CCDC)                                   | Compound (CCDC)                                     |
|---------------------|---------------------------------------------------|-----------------------------------------------------|
| Identification code | SS- <b>4a</b>                                     | SS- <b>6d</b>                                       |
| Empirical formula   | 'C <sub>19</sub> H <sub>19</sub> N <sub>5</sub> ' | 'C <sub>20</sub> H <sub>16</sub> ClN <sub>5</sub> ' |
| Formula weight      | 318.1719                                          | 362.1172                                            |
| Temperature         | 298(2) K                                          | 296(2) K                                            |
| Wavelength          | 0.71073 $\text{\AA}$                              | 0.71073 $\text{\AA}$                                |
| Crystal system      | Triclinic                                         | Monoclinic                                          |
| Space group         | P-1                                               | P 21/n                                              |

|                                 |                                    |                                    |
|---------------------------------|------------------------------------|------------------------------------|
| Unit cell dimensions            |                                    |                                    |
| a                               | 8.5845(3) Å                        | 12.968(2)Å                         |
| b                               | 10.8223(3) Å                       | 10.2902(18)Å                       |
| c                               | 12.5073(4) Å                       | 13.385(2)Å                         |
| $\alpha$                        | 84.207(2) °                        | 90.00°                             |
| $\beta$                         | 72.287(2) °                        | 98.889(12)°                        |
| $\gamma$                        | 75.180(2) °                        | 90.00°                             |
| Volume                          | 1069.73(6) Å <sup>3</sup>          | 1764.7(5)Å <sup>3</sup>            |
| Z                               | 2                                  | 4                                  |
| Density (calculated)            | 1.228 g/cm <sup>3</sup>            | 1.362g/cm <sup>3</sup>             |
| Absorption coefficient          | 0.172 mm <sup>-1</sup>             | 0.230 mm <sup>-1</sup>             |
| F(000)                          | 420.0                              | 752                                |
| Theta range for data collection | 1.71 to 28.42 °                    | 2.04 to 24.99 °                    |
| Index ranges                    | -11<=h<=11, -13<=k<=13, -16<=l<=14 | -15<=h<=15, -11<=k<=12, -15<=l<=15 |
| Reflections collected           | 13065                              | 12046                              |
| Independent reflections         | 5294 R <sub>int</sub> = 0.0606     | 2962 R <sub>int</sub> = 0.1004     |
| Completeness to $\theta^\circ$  | 98.3 % ( $\theta = 28.42^\circ$ )  | 95.4% ( $\theta = 24.99^\circ$ )   |
| Refinement method               | Full-matrix least-squares on F2    | Full-matrix least-squares on F2    |

|                                   |                                                        |                                                        |
|-----------------------------------|--------------------------------------------------------|--------------------------------------------------------|
| Data / restraints / parameters    | 5294 / 0 / 268                                         | 2962 / 0 / 237                                         |
| Goodness-of-fit on F2             | 1.086                                                  | 1.010                                                  |
| Final R indices [ $>2\sigma(I)$ ] | $R_{\text{obs}} = 0.0772$ , $wR_{\text{obs}} = 0.2353$ | $R_{\text{obs}} = 0.1537$ , $wR_{\text{obs}} = 0.3668$ |
| R indices (all data)              | $R_{\text{all}} = 0.0952$ , $wR_{\text{all}} = 0.2513$ | $R_{\text{all}} = 0.1914$ , $wR_{\text{all}} = 0.3821$ |
| Largest diff. peak and hole       | 1.109 and $-1.204\text{e}\cdot\text{\AA}^{-3}$         | 0.964 and $-0.525\text{e}\cdot\text{\AA}^{-3}$         |

<sup>1</sup>H-NMR spectra of compound 4a

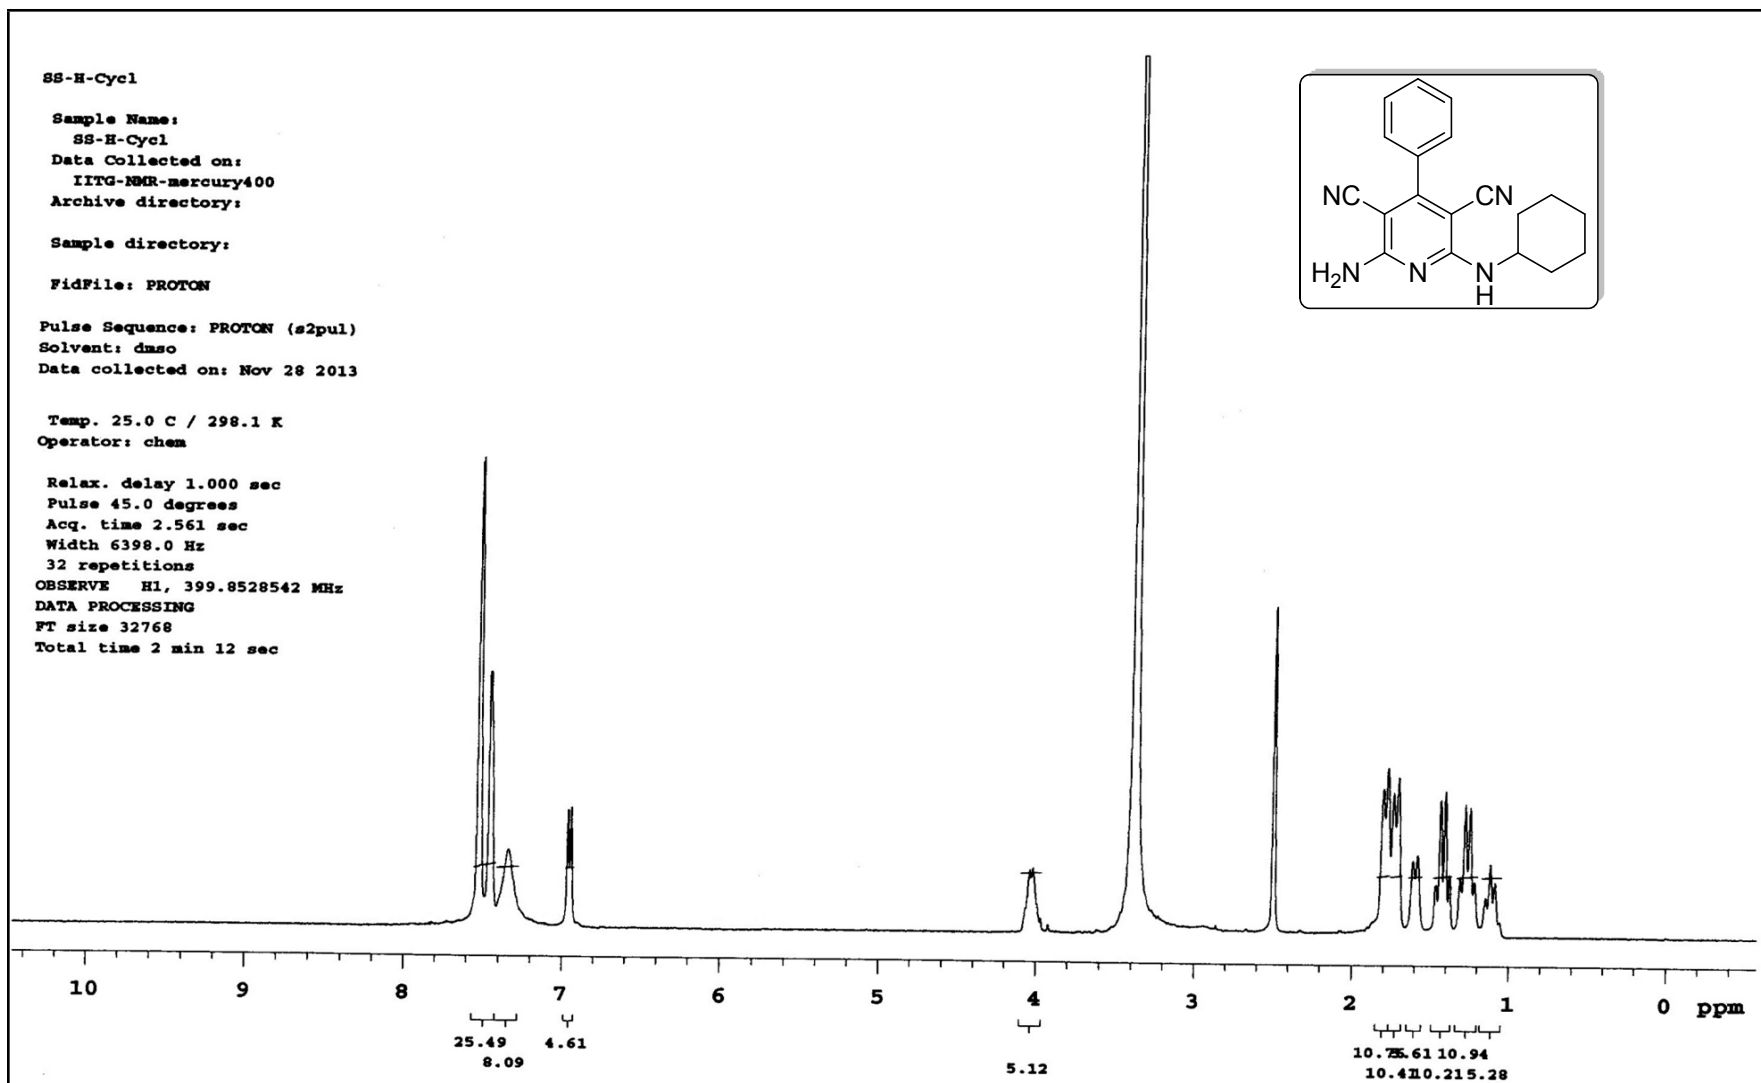

<sup>13</sup>C-NMR spectra of compound 4a

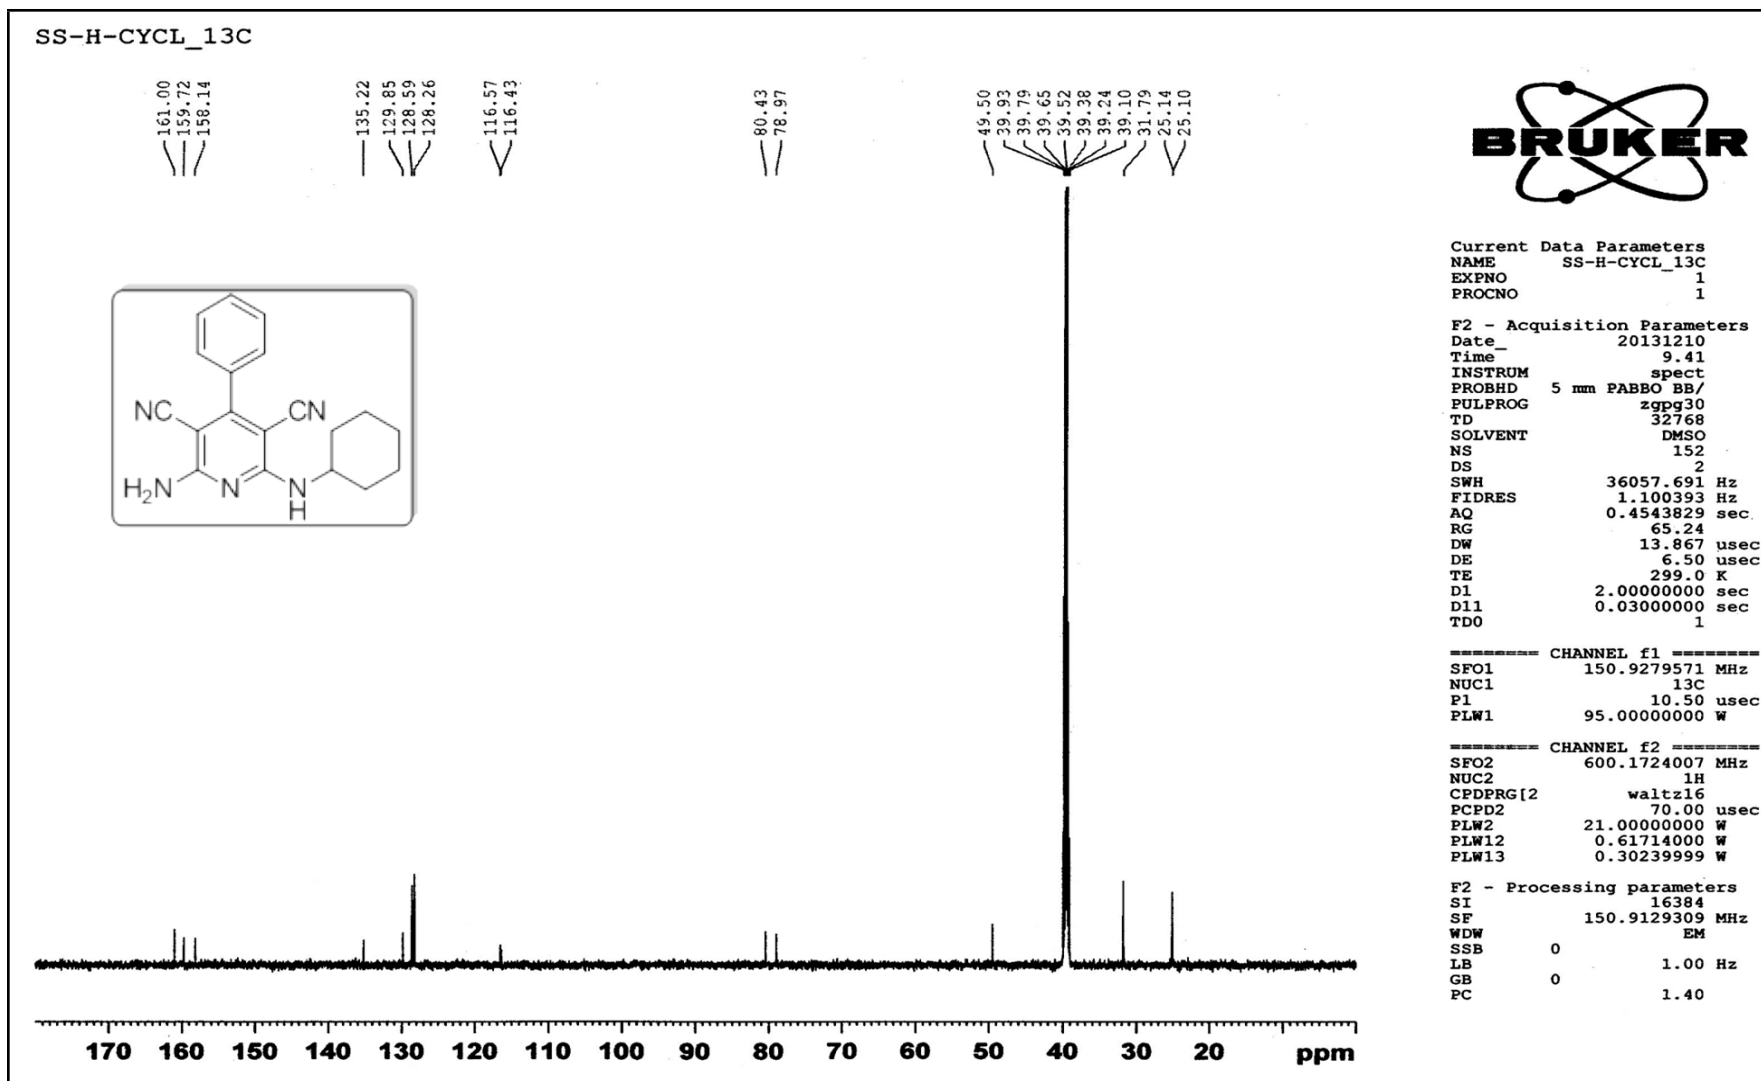

# HRMS spectra of compound 4a

|                      |              |                    |             |                        |                                   |                               |             |
|----------------------|--------------|--------------------|-------------|------------------------|-----------------------------------|-------------------------------|-------------|
| <b>Sample Name</b>   | Unavailable  | <b>Position</b>    | Unavailable | <b>Instrument Name</b> | Unavailable                       | <b>User Name</b>              | Unavailable |
| <b>Inj Vol</b>       | Unavailable  | <b>InjPosition</b> | Unavailable | <b>SampleType</b>      | Unavailable                       | <b>IRM Calibration Status</b> | Success     |
| <b>Data Filename</b> | SS-PH-CYCL.d | <b>ACQ Method</b>  |             | <b>Comment</b>         | Sample information is unavailable | <b>Acquired Time</b>          | Unavailable |

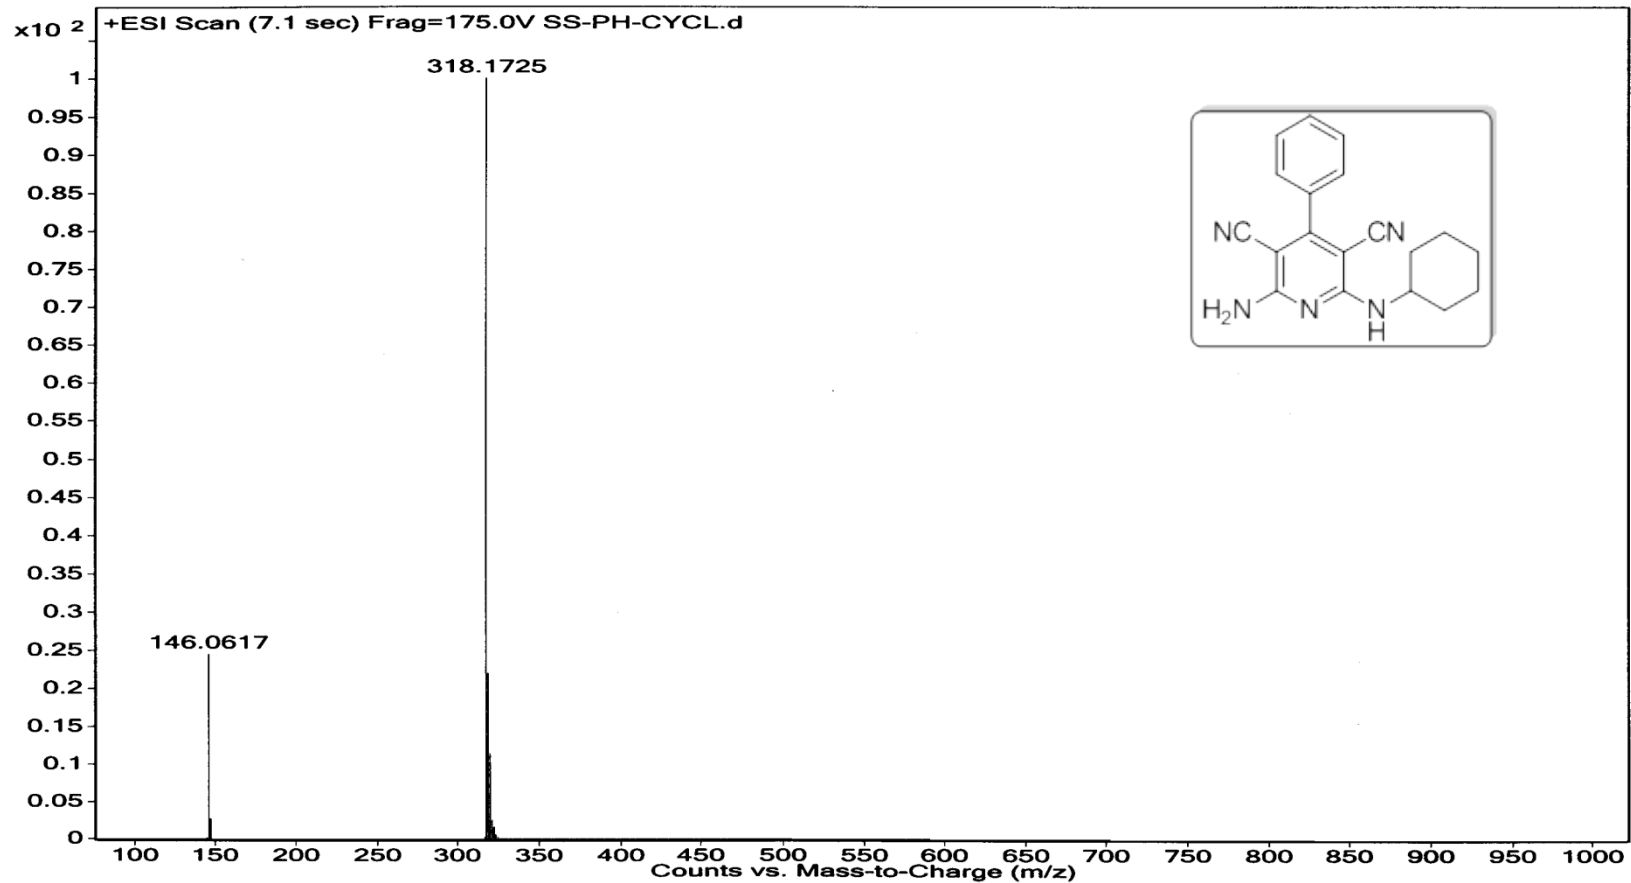

<sup>1</sup>H-NMR spectra of compound 4b

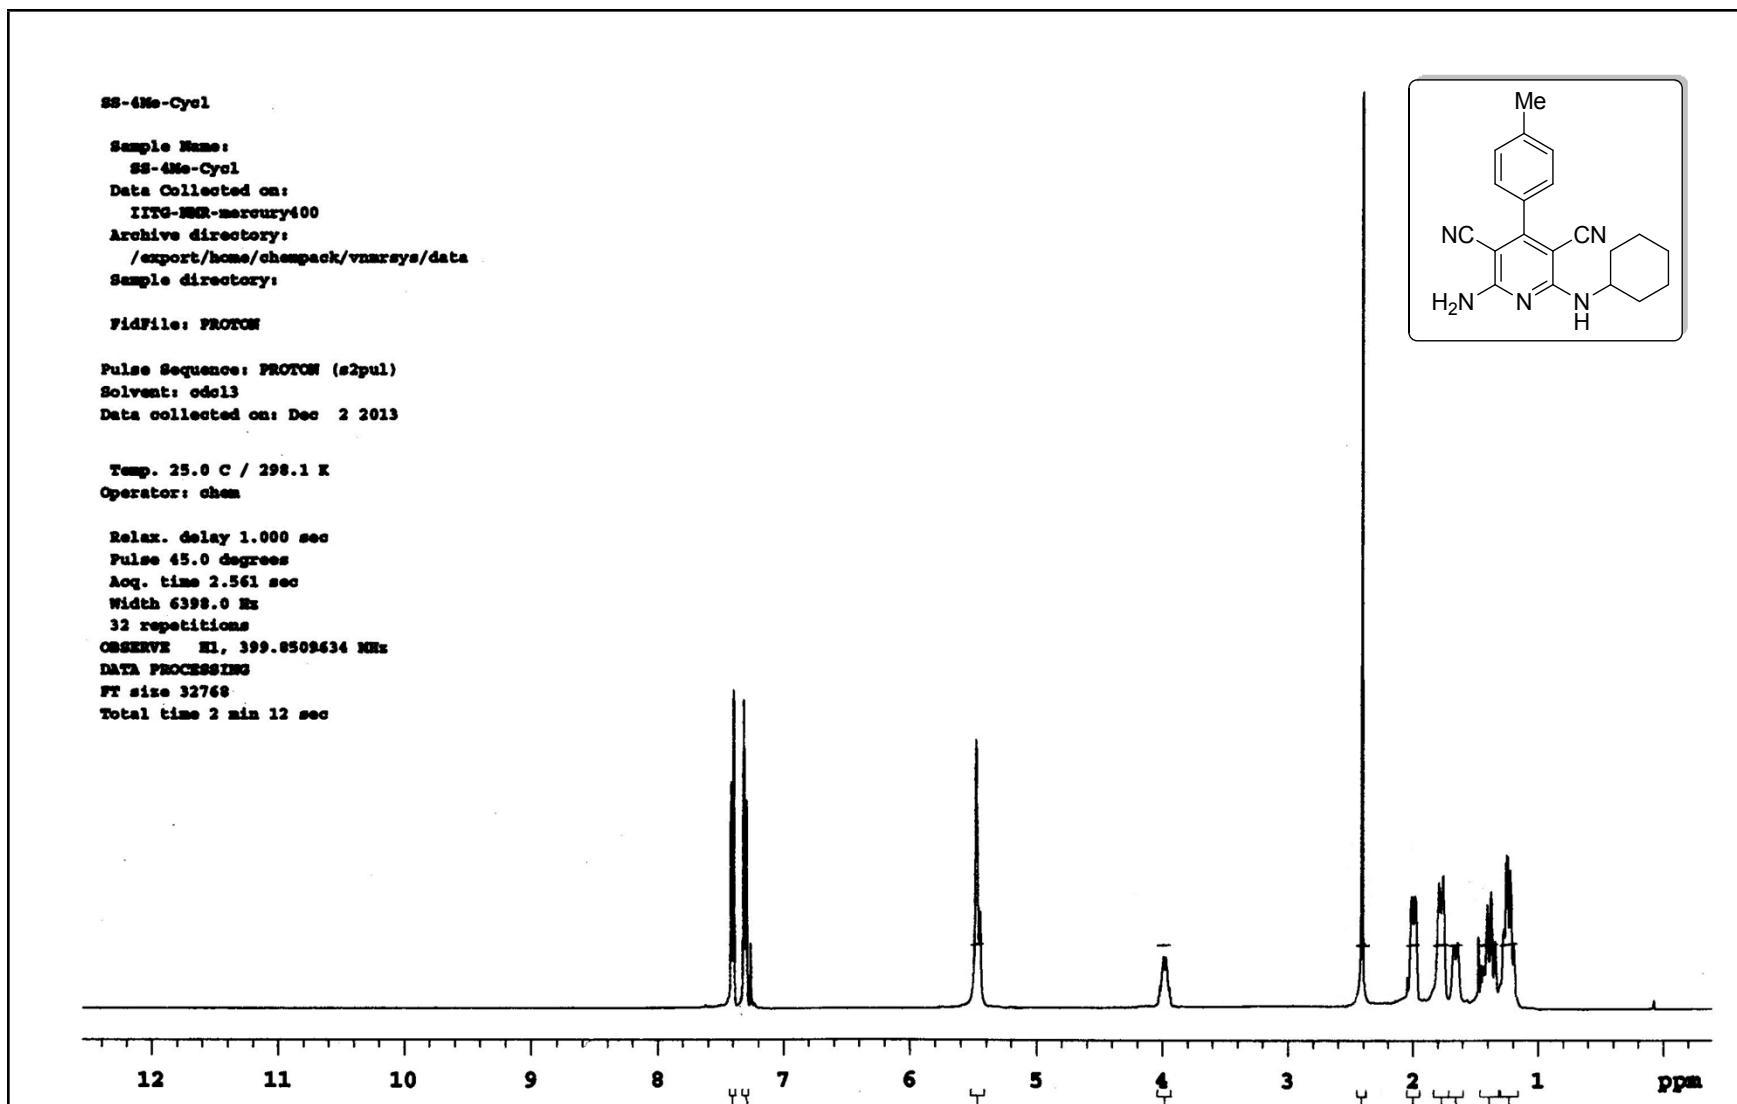



13C-NMR spectra of compound 4b

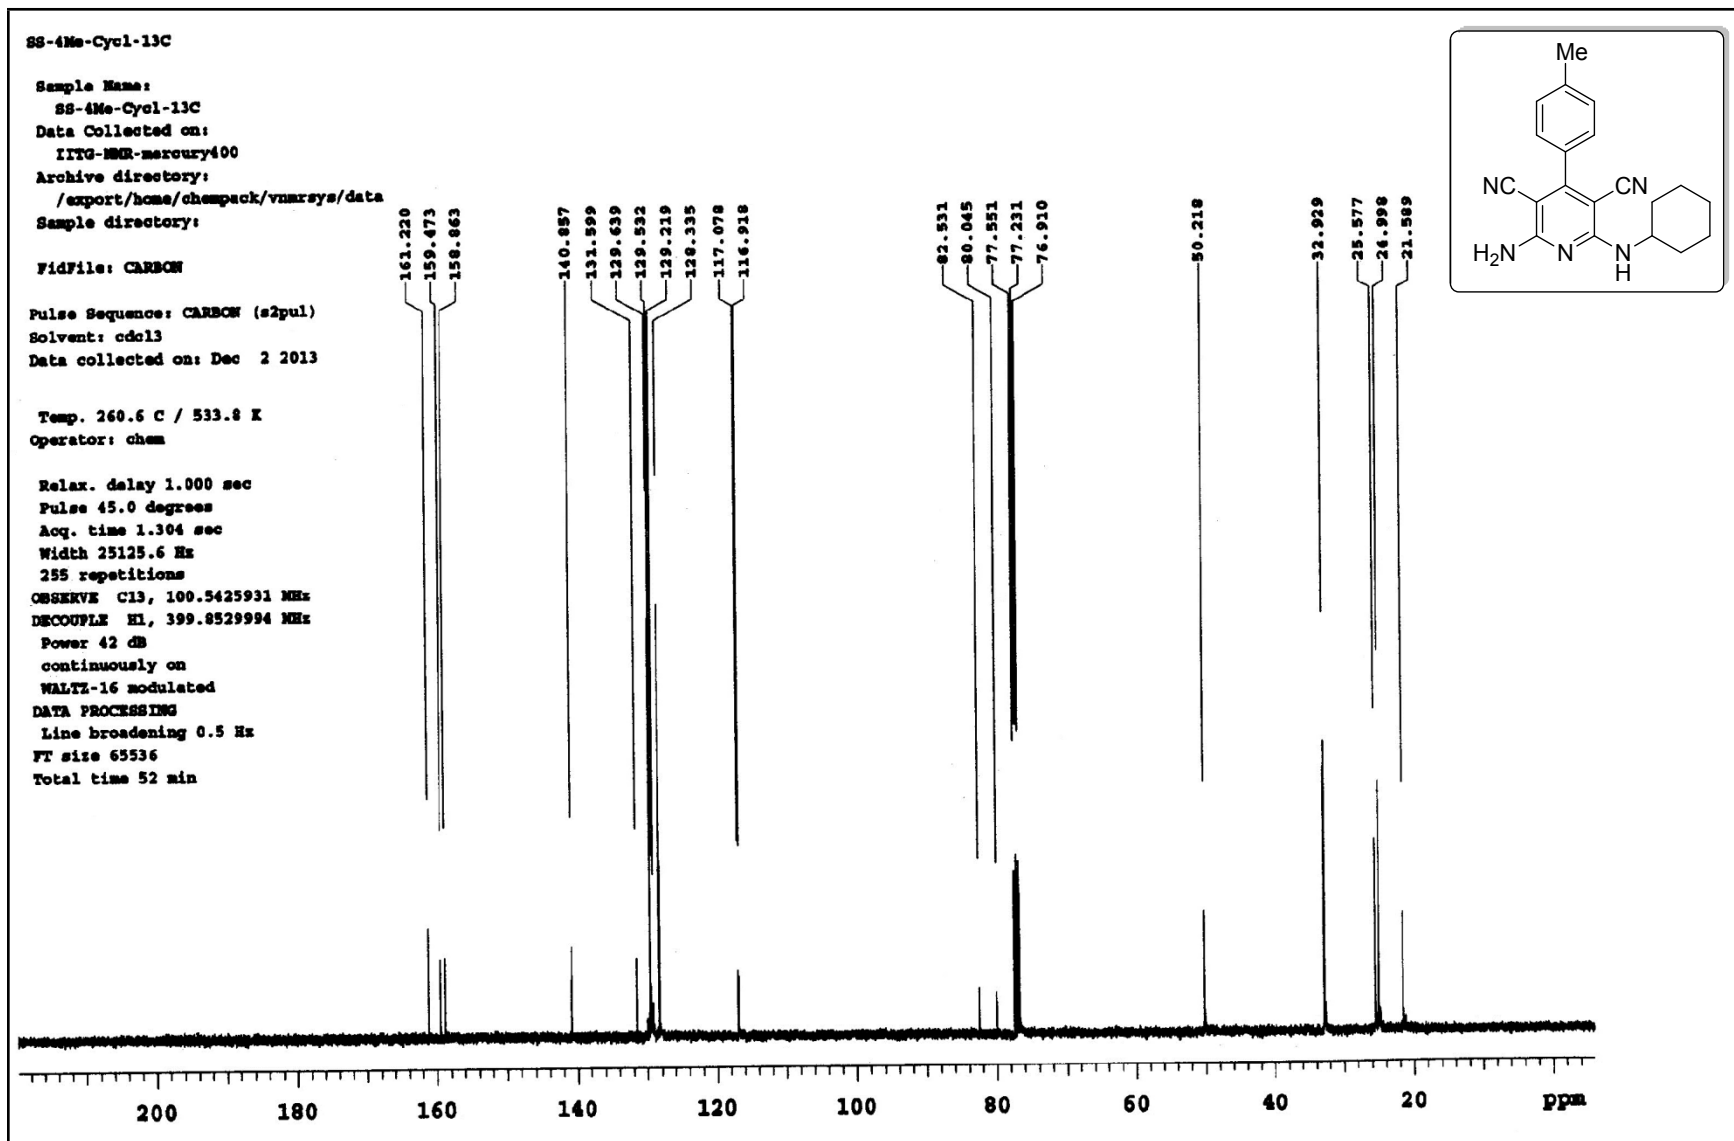

# HRMS spectra of compound 4b

Sample Name  
Inj Vol  
Data Filename

Position  
InjPosition  
ACQ Method

Instrument Name  
SampleType  
Comment

User Name  
IRM Calibration Status  
Acquired Time

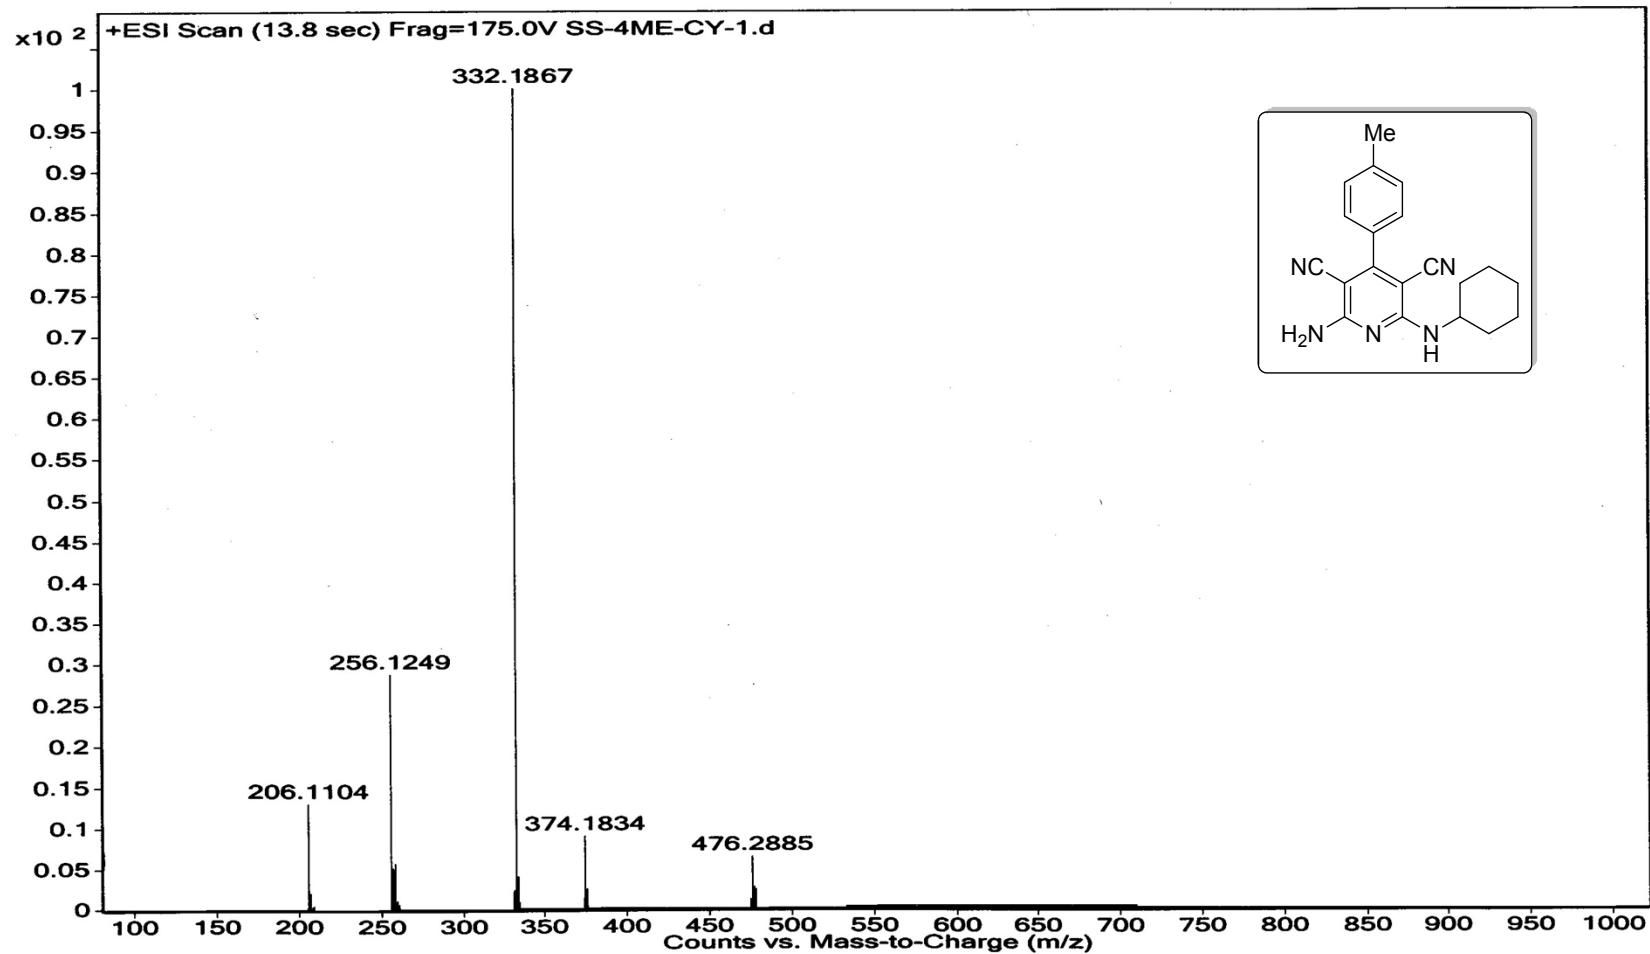

<sup>1</sup>H-NMR spectra of compound 4c

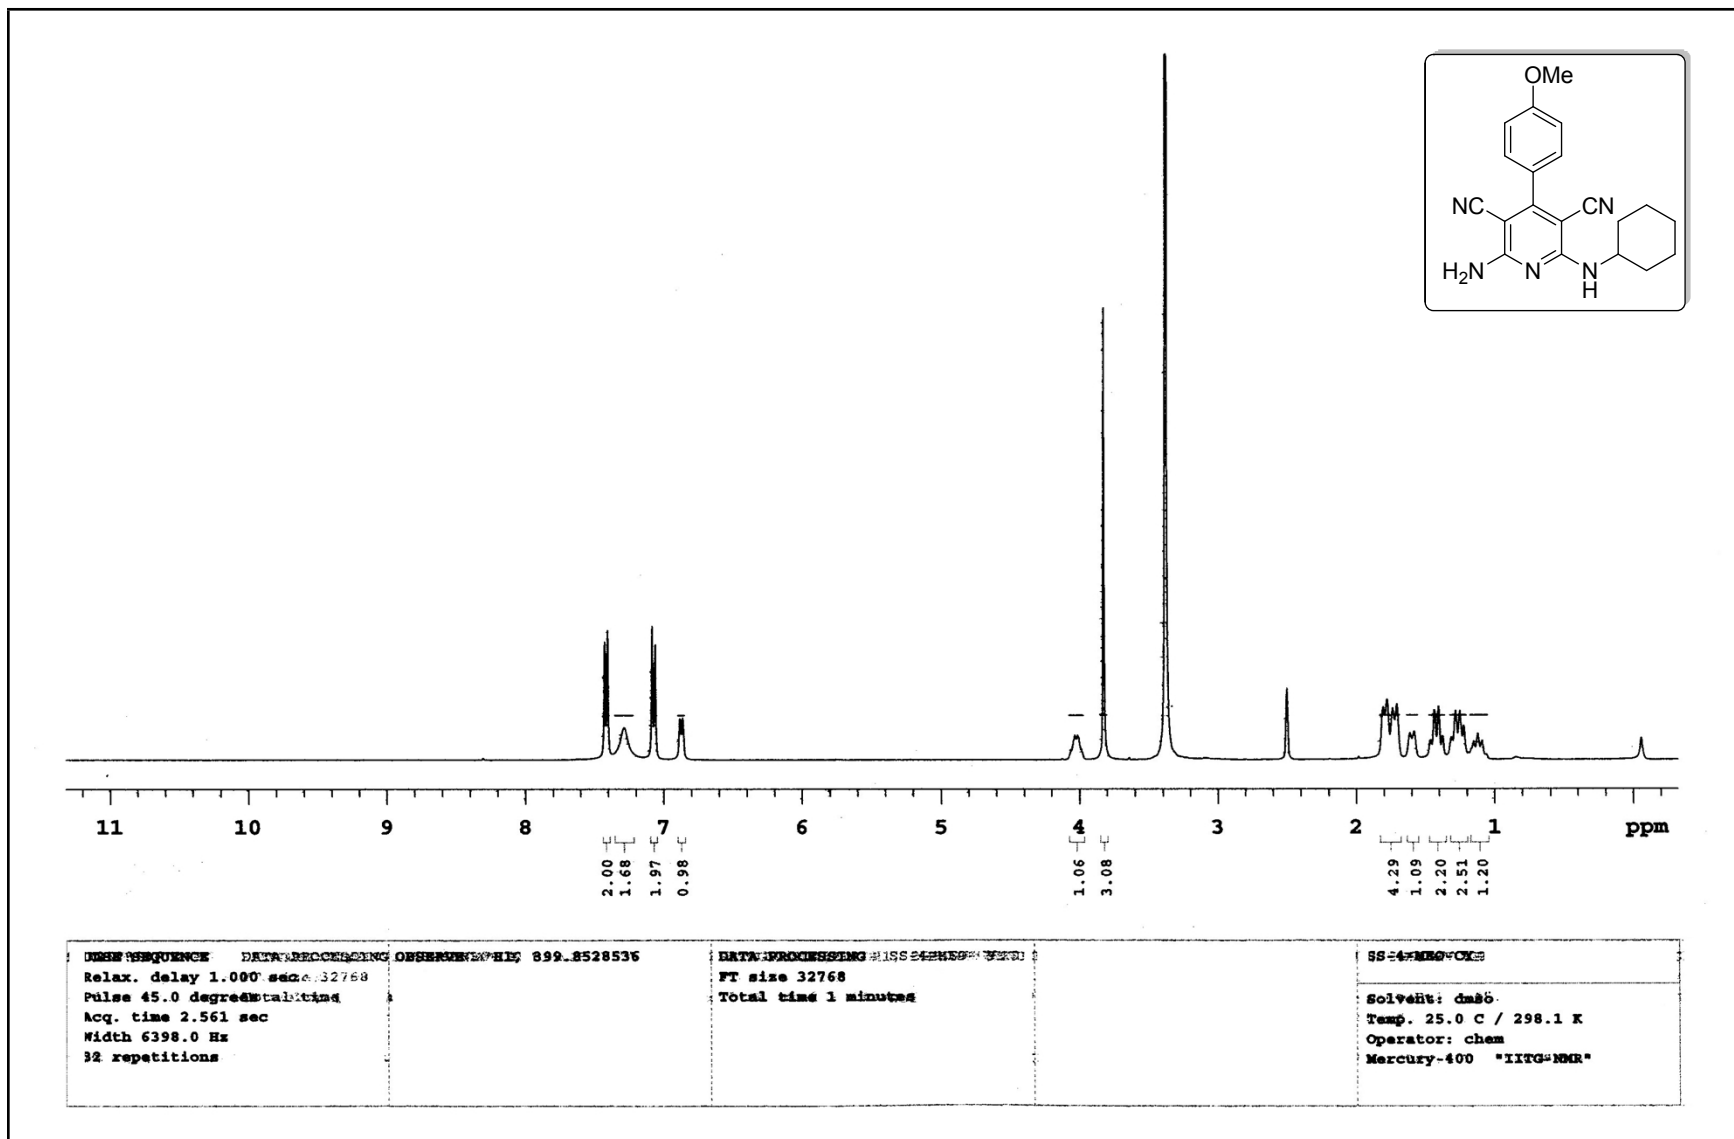

<sup>13</sup>C-NMR spectra of compound 4c

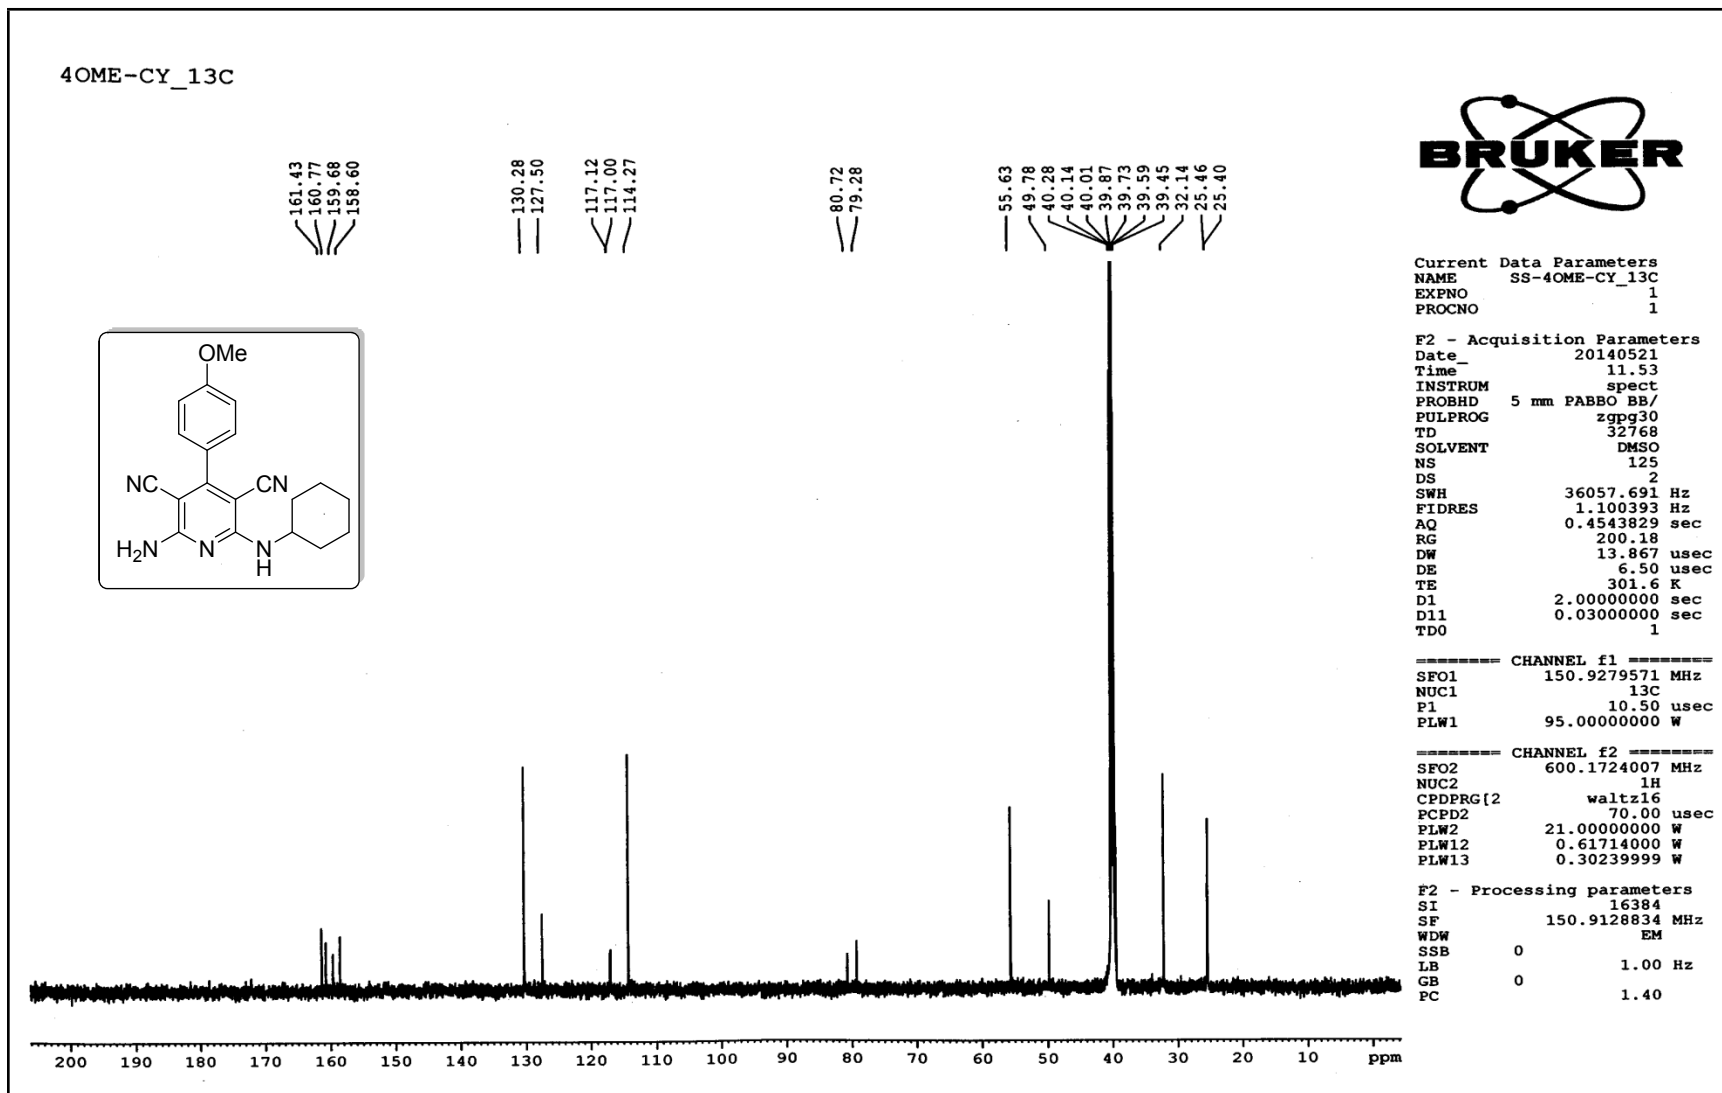

# HRMS-spectra of compound 4c

|                      |                |                    |             |                        |                                   |                               |             |
|----------------------|----------------|--------------------|-------------|------------------------|-----------------------------------|-------------------------------|-------------|
| <b>Sample Name</b>   | Unavailable    | <b>Position</b>    | Unavailable | <b>Instrument Name</b> | Unavailable                       | <b>User Name</b>              | Unavailable |
| <b>Inj Vol</b>       | Unavailable    | <b>InjPosition</b> | Unavailable | <b>SampleType</b>      | Unavailable                       | <b>IRM Calibration Status</b> | Success     |
| <b>Data Filename</b> | SS-4OME-CYCL.d | <b>ACQ Method</b>  |             | <b>Comment</b>         | Sample information is unavailable | <b>Acquired Time</b>          | Unavailable |

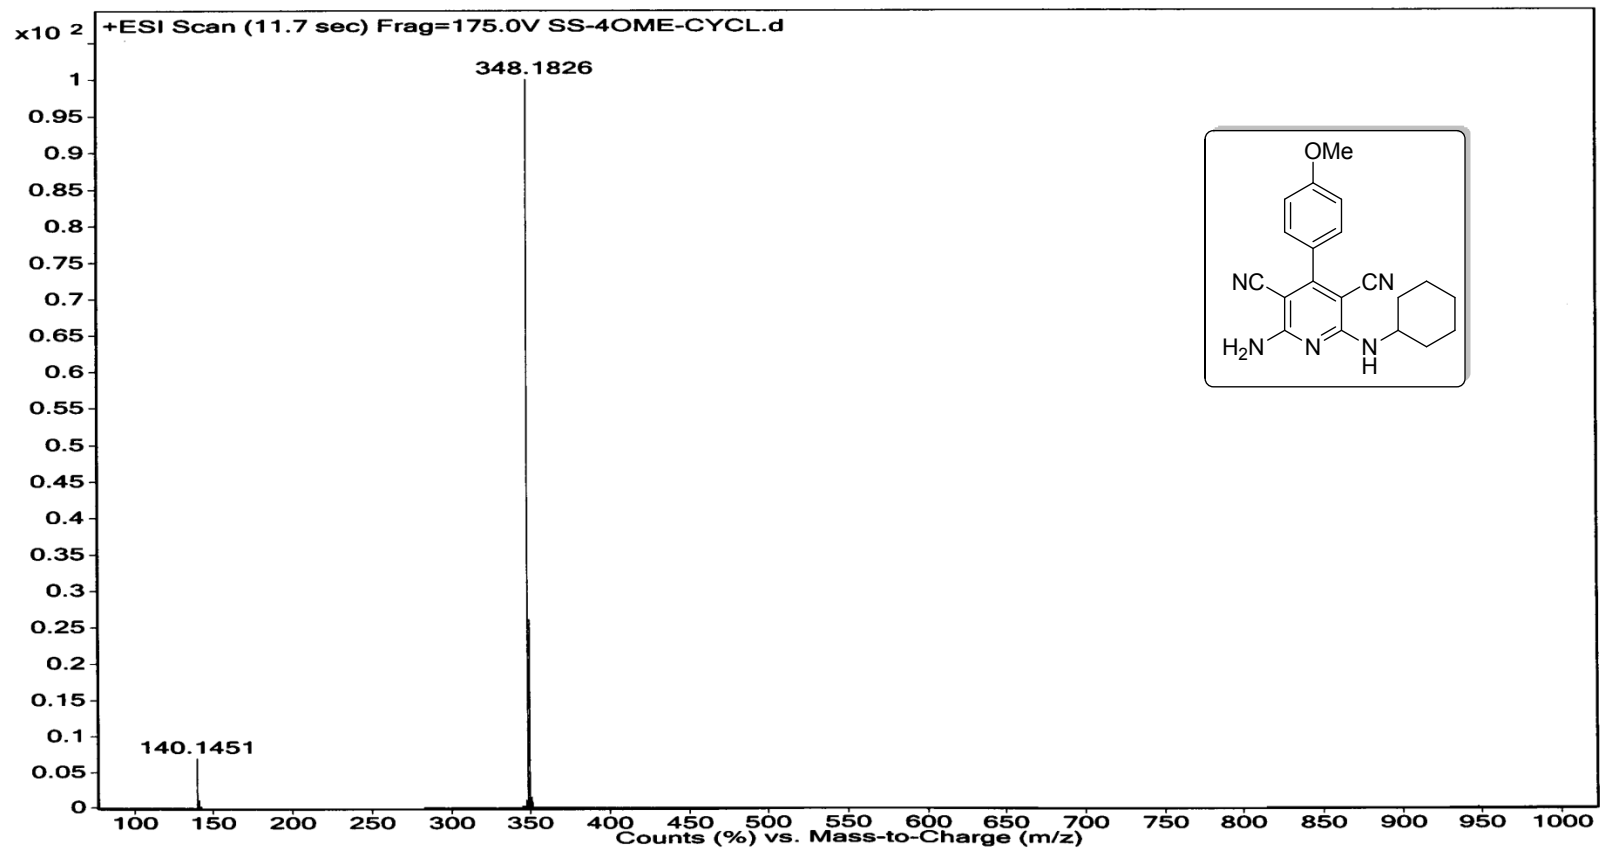

<sup>1</sup>H-NMR spectra of compound **4d**

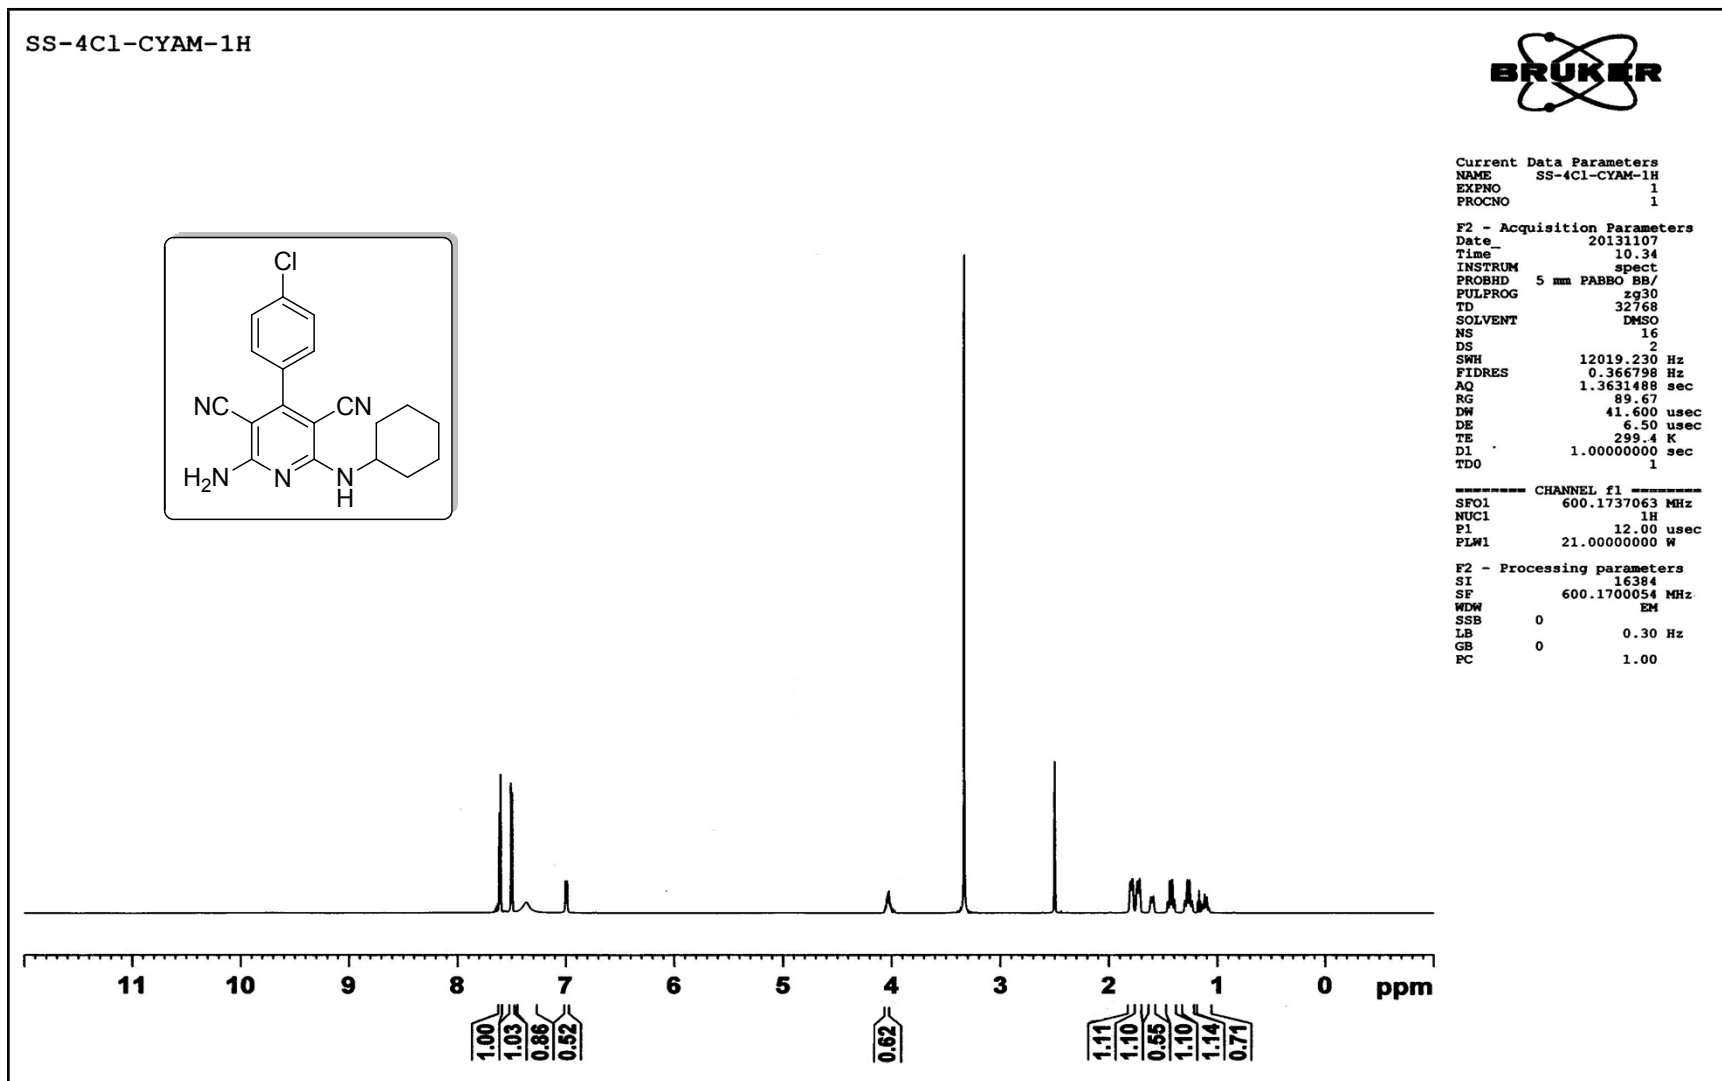

<sup>13</sup>C-NMR spectra of compound 4d

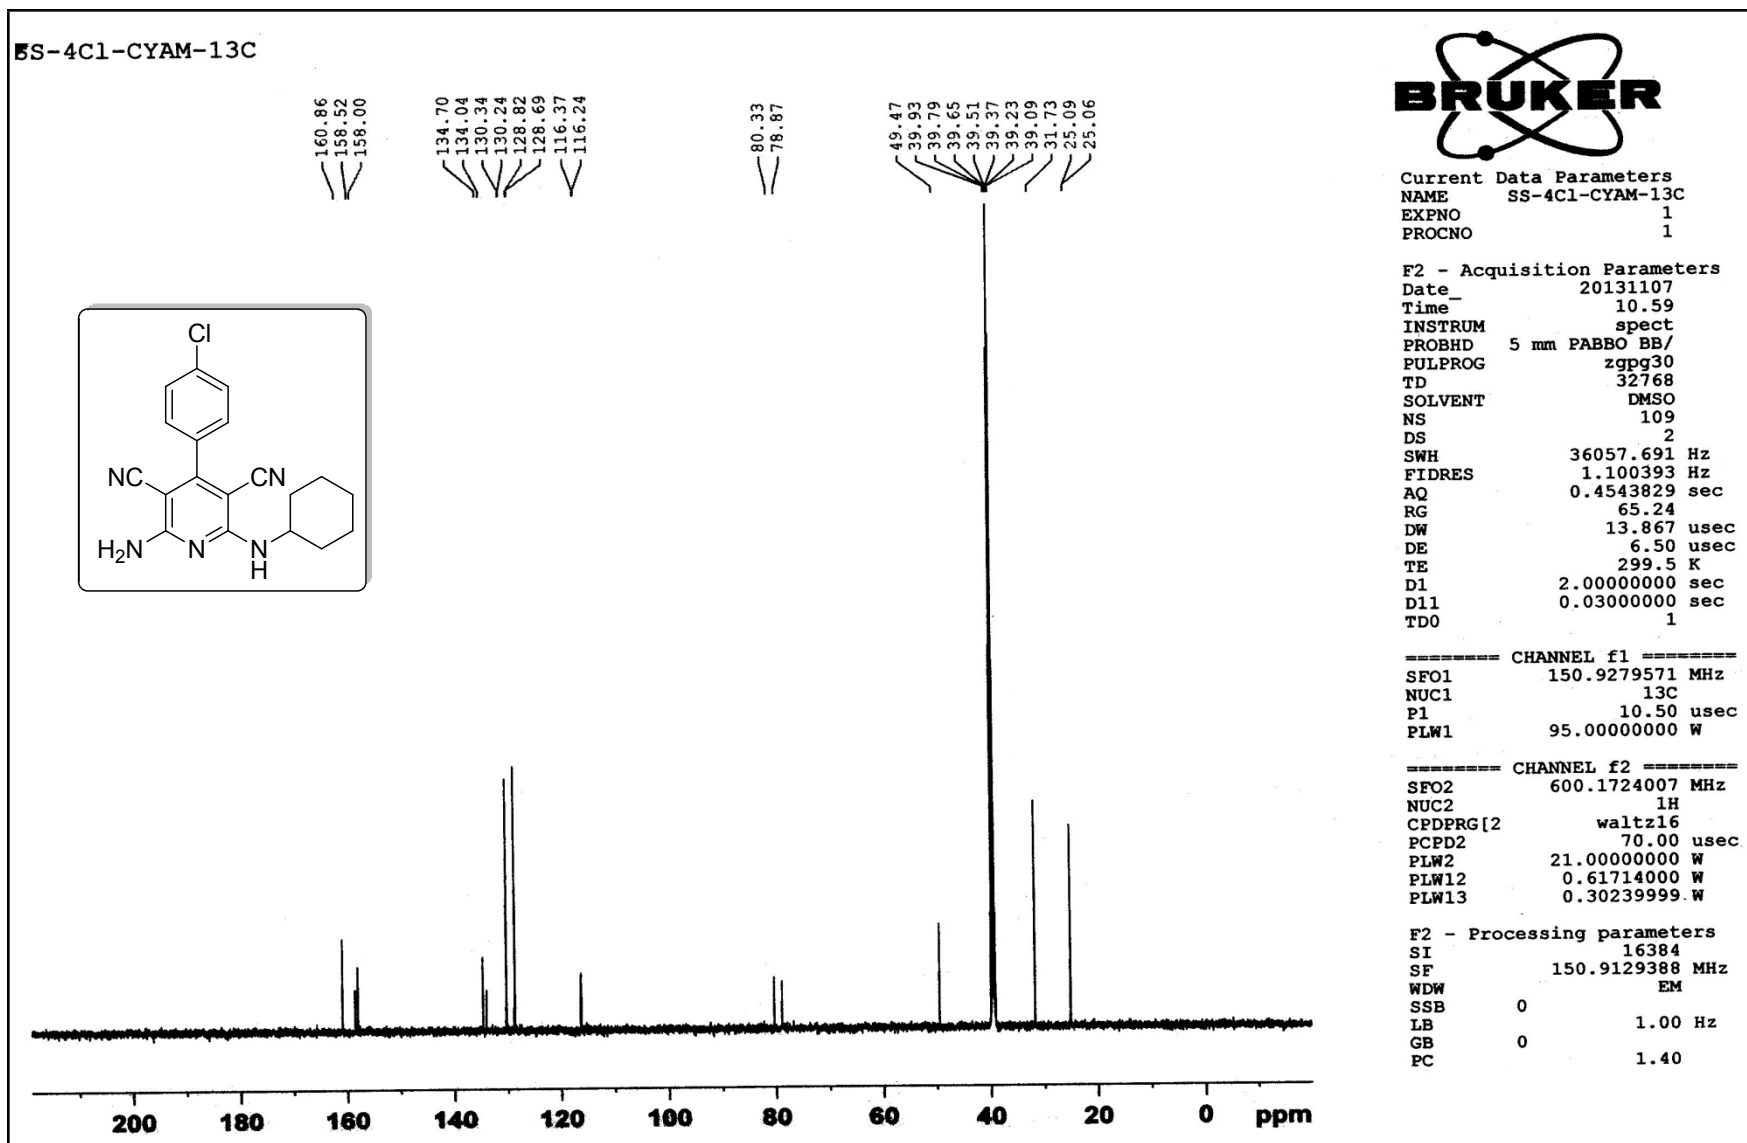

# HRMS spectra of compound 4d

|                      |             |                    |    |                        |              |                               |                       |
|----------------------|-------------|--------------------|----|------------------------|--------------|-------------------------------|-----------------------|
| <b>Sample Name</b>   | SS-4Cl-CY   | <b>Position</b>    | -1 | <b>Instrument Name</b> | Instrument 1 | <b>User Name</b>              |                       |
| <b>Inj Vol</b>       | -10         | <b>InjPosition</b> |    | <b>SampleType</b>      | Sample       | <b>IRM Calibration Status</b> | Success               |
| <b>Data Filename</b> | SS-4Cl-CY.d | <b>ACQ Method</b>  |    | <b>Comment</b>         |              | <b>Acquired Time</b>          | 3/24/2014 12:10:07 PM |

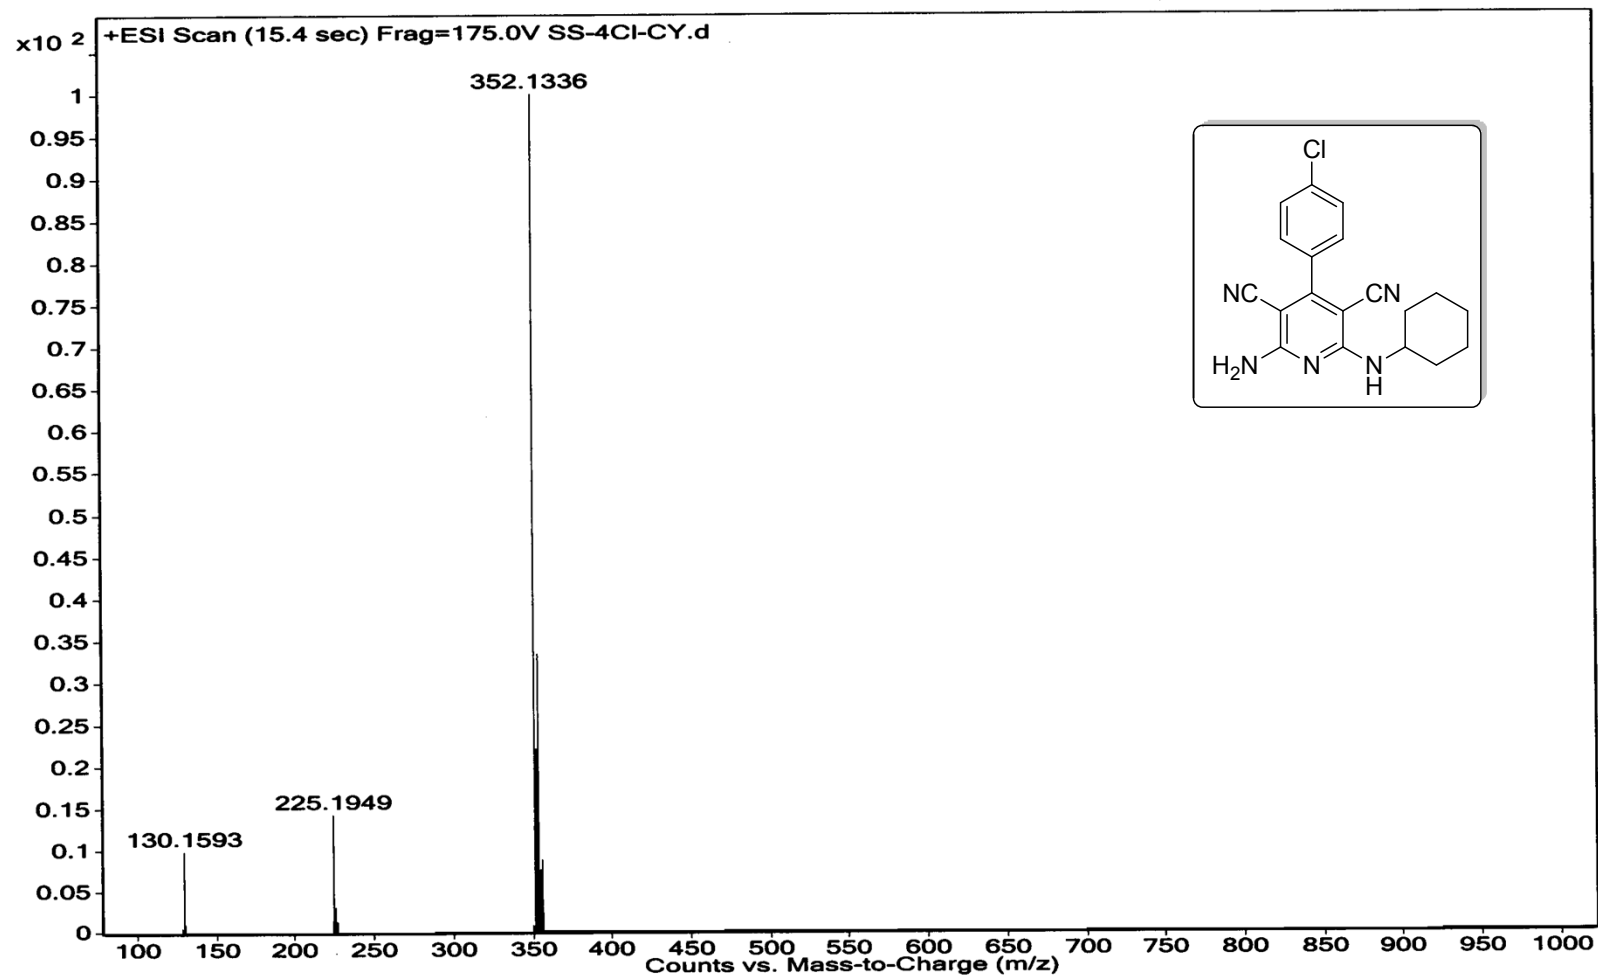



<sup>1</sup>H-NMR spectra of compound 4e

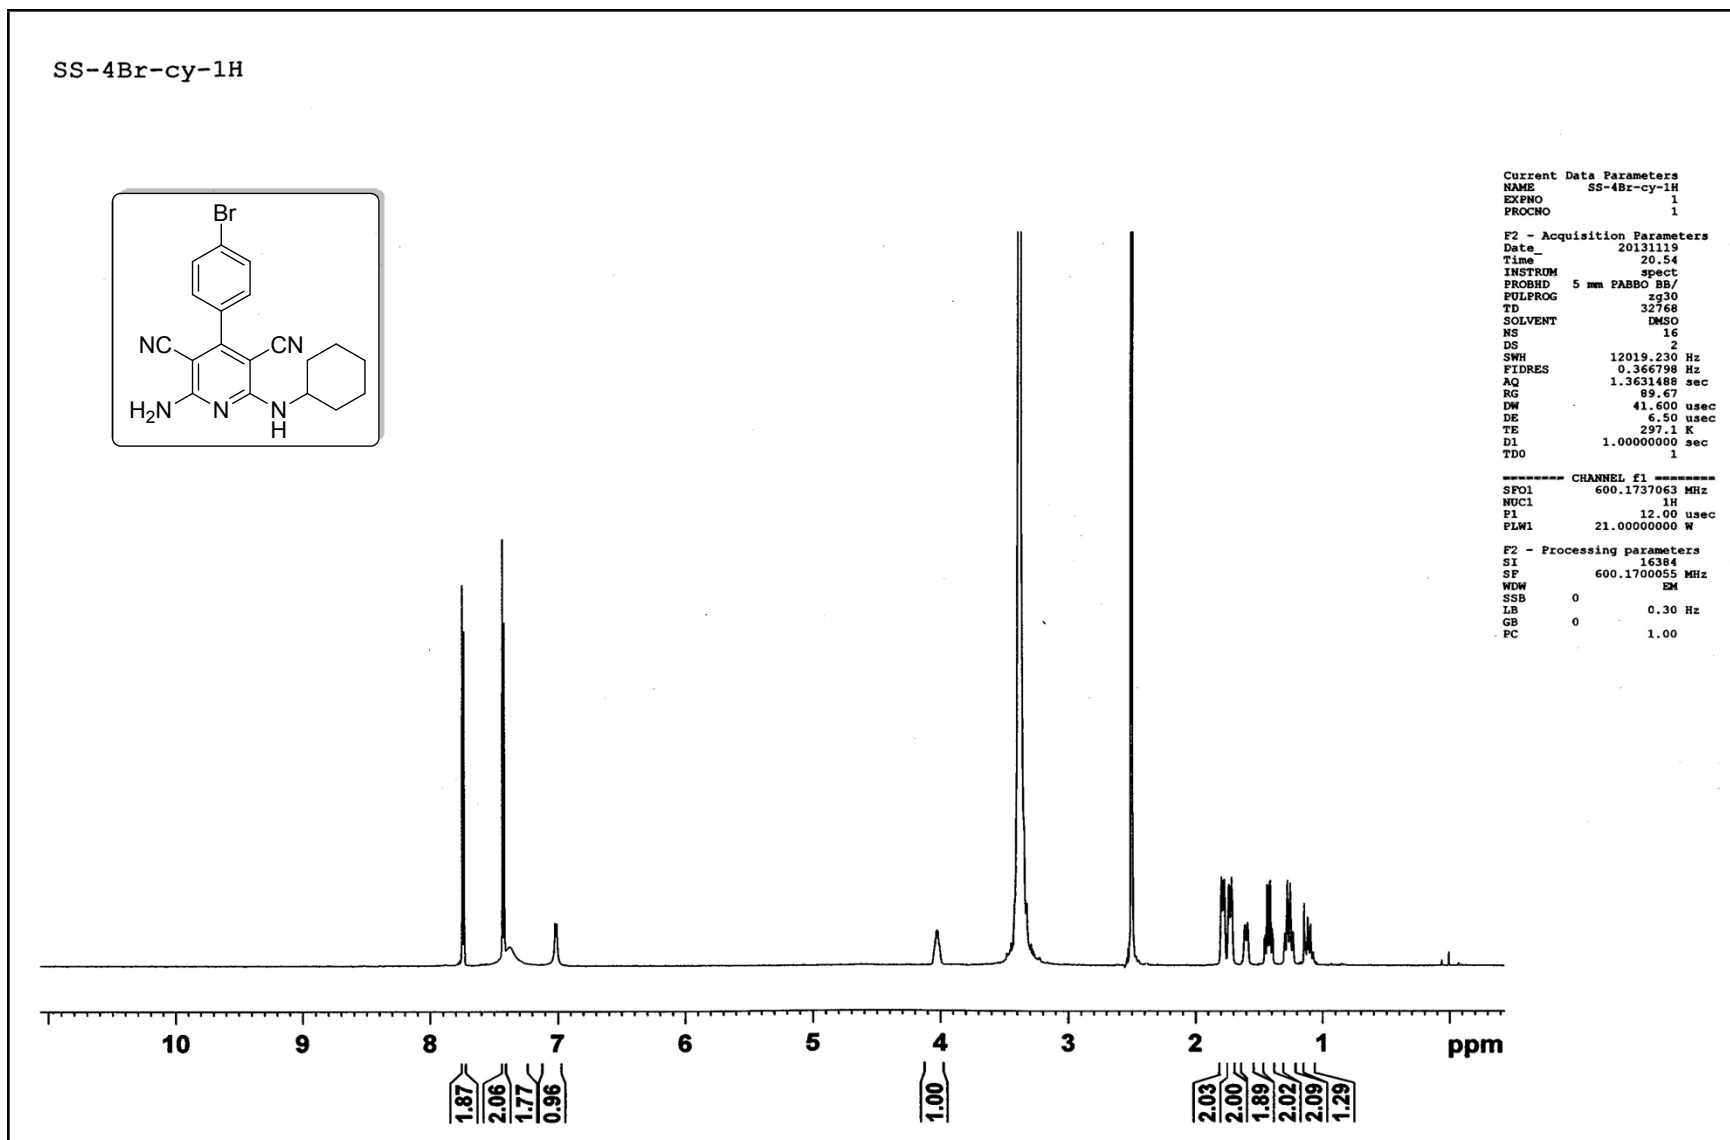

<sup>13</sup>C-NMR spectra of compound 4e

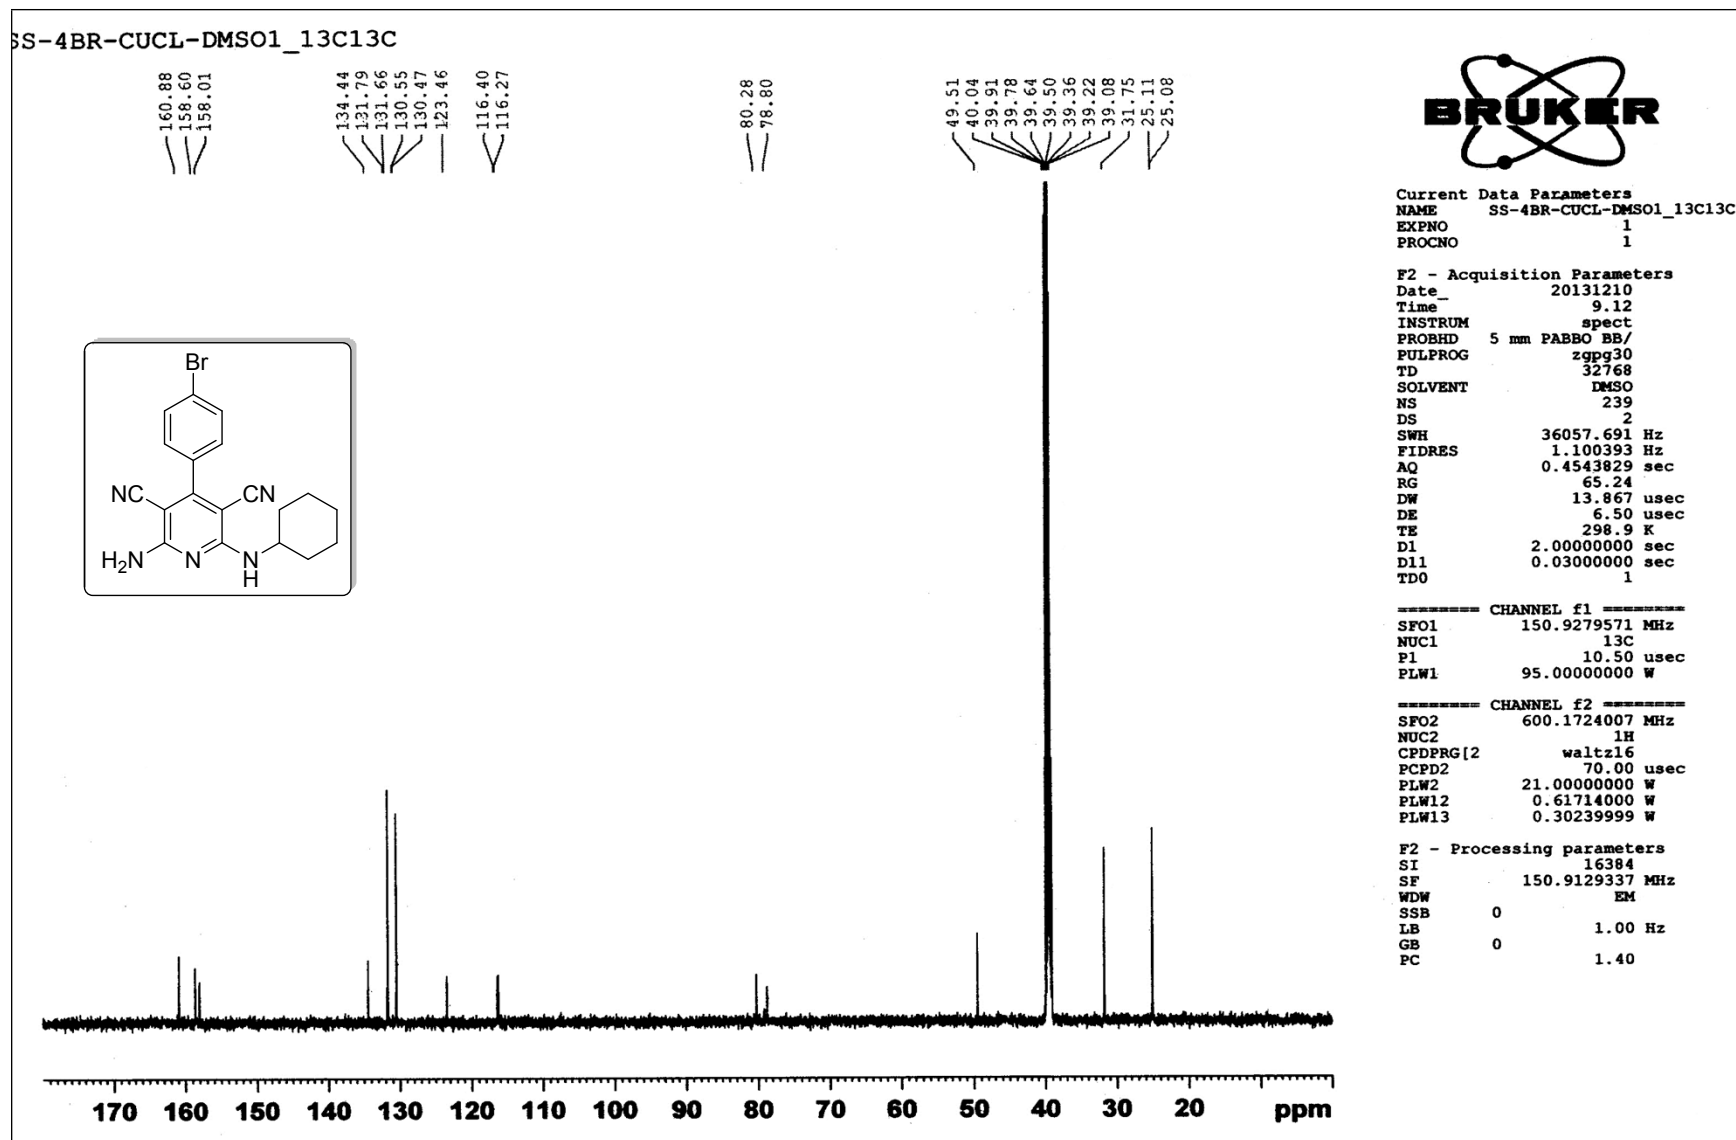

HRMS-spectra of compound 4e

|               |                |             |    |                 |              |                        |                       |
|---------------|----------------|-------------|----|-----------------|--------------|------------------------|-----------------------|
| Sample Name   | SS-4-Cl-CYCl   | Position    | -1 | Instrument Name | Instrument 1 | User Name              |                       |
| Inj Vol       | -10            | InjPosition |    | SampleType      | Sample       | IRM Calibration Status | Success               |
| Data Filename | SS-4-Cl-CYCl.d | ACQ Method  |    | Comment         |              | Acquired Time          | 4/10/2014 11:39:29 AM |

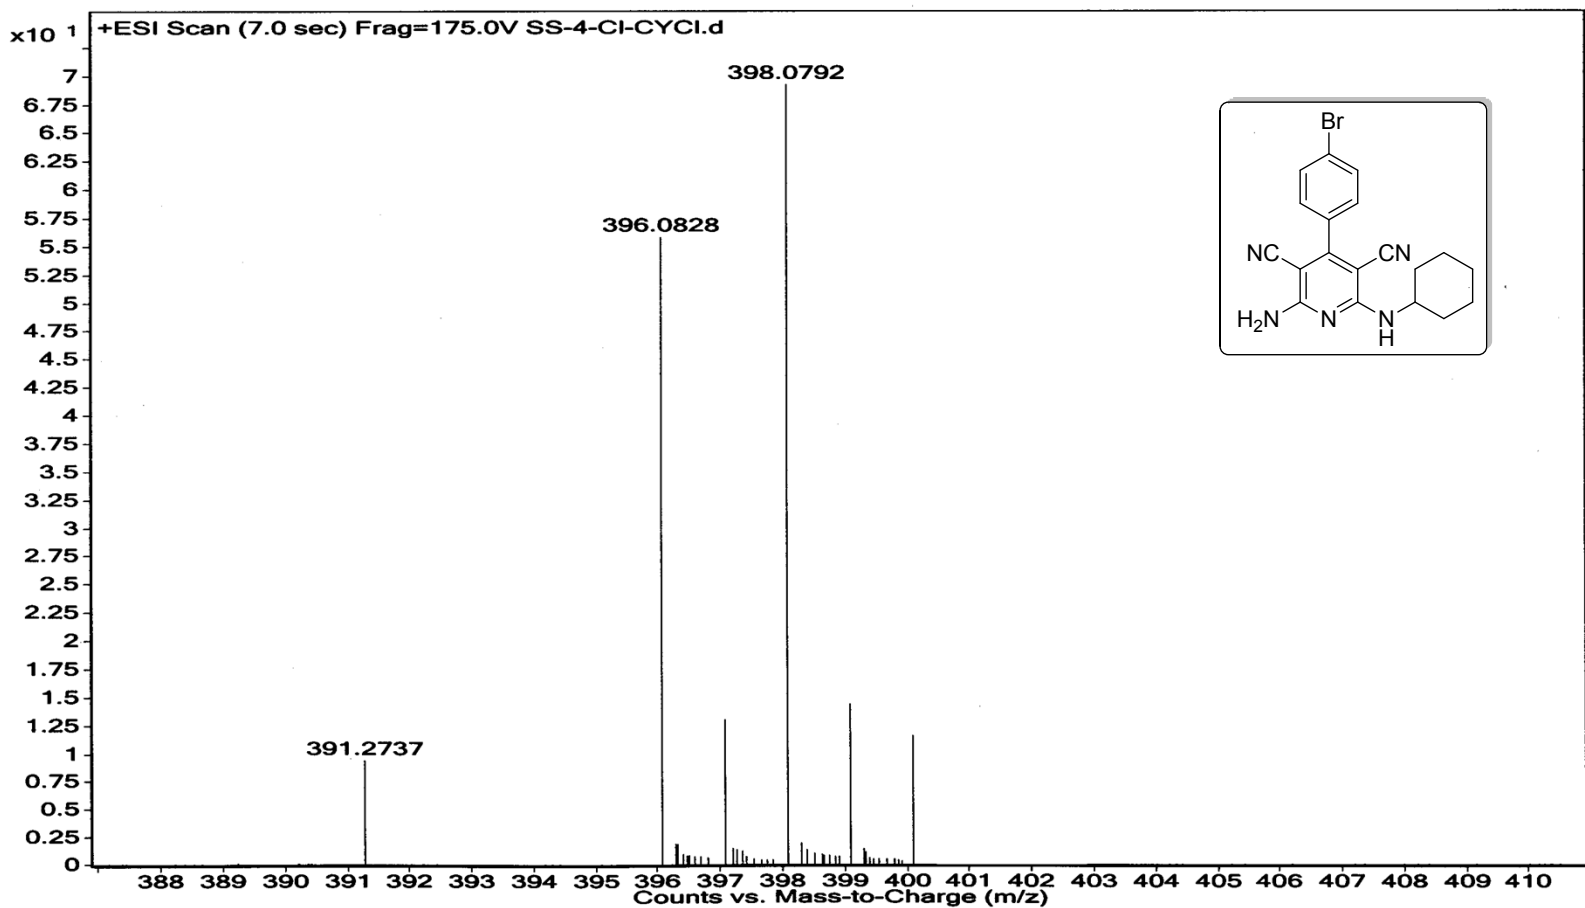

<sup>1</sup>H-NMR spectra of compound **4g**

SS-4CN-CY-1H

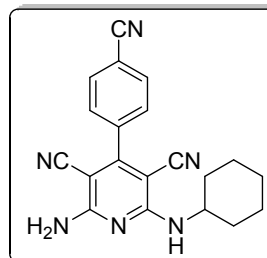

```
Current Data Parameters
NAME      SS-4CN-CY-1H
EXPNO     1
PROCNO    1

F2 - Acquisition Parameters
Date_     20140724
Time      11.45
INSTRUM   spect
PROBHD    5 mm PABBO BB/
PULPROG   zg30
TD         32768
SOLVENT   CDCl3
NS         16
DS         2
SWH        12019.230 Hz
FIDRES     0.366798 Hz
AQ         1.3631488 sec
RG         27.82
DW         41.600 usec
DE         6.50 usec
TE         300.0 K
D1         1.00000000 sec
TDO        1

----- CHANNEL f1 -----
SFO1      600.1737063 MHz
NUC1       1H
P1         12.00 usec
PLM1       21.00000000 W

F2 - Processing parameters
SI         16384
SF         600.1700141 MHz
WDW        EM
SSB        0
LB         0.30 Hz
GB         0
PC         1.00
```

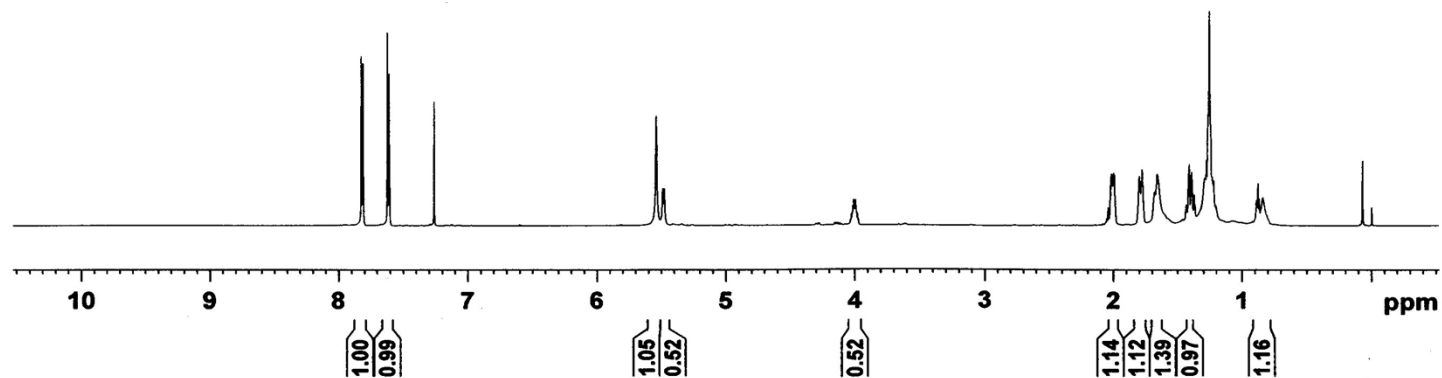

<sup>13</sup>C-NMR spectra of compound 4g

4CN-CY-13C

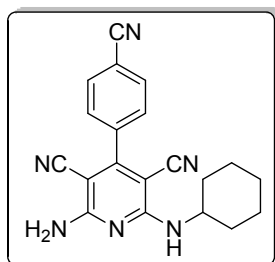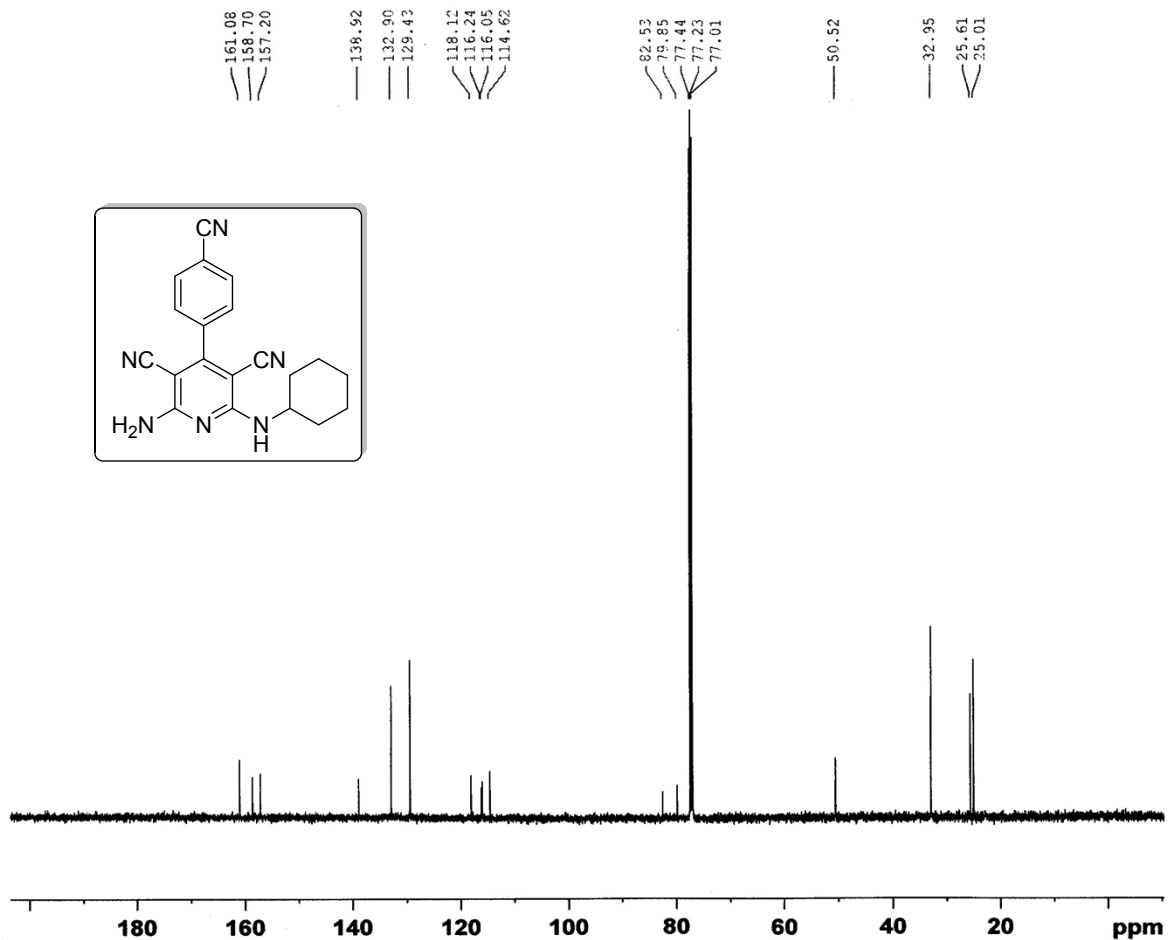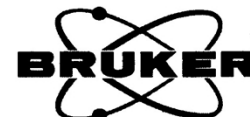

Current Data Parameters  
 NAME SS-4CN-CY-13C  
 EXPNO 1  
 PROCNO 1

F2 - Acquisition Parameters  
 Date\_ 20140724  
 Time\_ 11.54  
 INSTRUM spect  
 PROBHD 5 mm PABBO BB/  
 PULPROG zgpg30  
 TD 32768  
 SOLVENT CDCl3  
 NS 305  
 DS 2  
 SWH 36057.691 Hz  
 FIDRES 1.100393 Hz  
 AQ 0.4543829 sec  
 RG 65.24  
 DW 13.867 usec  
 DE 6.50 usec  
 TE 300.3 K  
 D1 2.0000000 sec  
 D11 0.03000000 sec  
 TD0 1

===== CHANNEL f1 =====  
 SFO1 150.9279571 MHz  
 NUC1 13C  
 P1 10.50 usec  
 PLW1 95.00000000 W

===== CHANNEL f2 =====  
 SFO2 600.1724007 MHz  
 NUC2 1H  
 CPDPRG[2] waltz16  
 PCPD2 70.00 usec  
 PLW2 21.00000000 W  
 PLW12 0.61714000 W  
 PLW13 0.30239999 W

F2 - Processing parameters  
 SI 16384  
 SF 150.9128370 MHz  
 WDW EM  
 SSB 0  
 LB 1.00 Hz  
 GB 0  
 PC 1.40

HRMS spectra of compound 4g

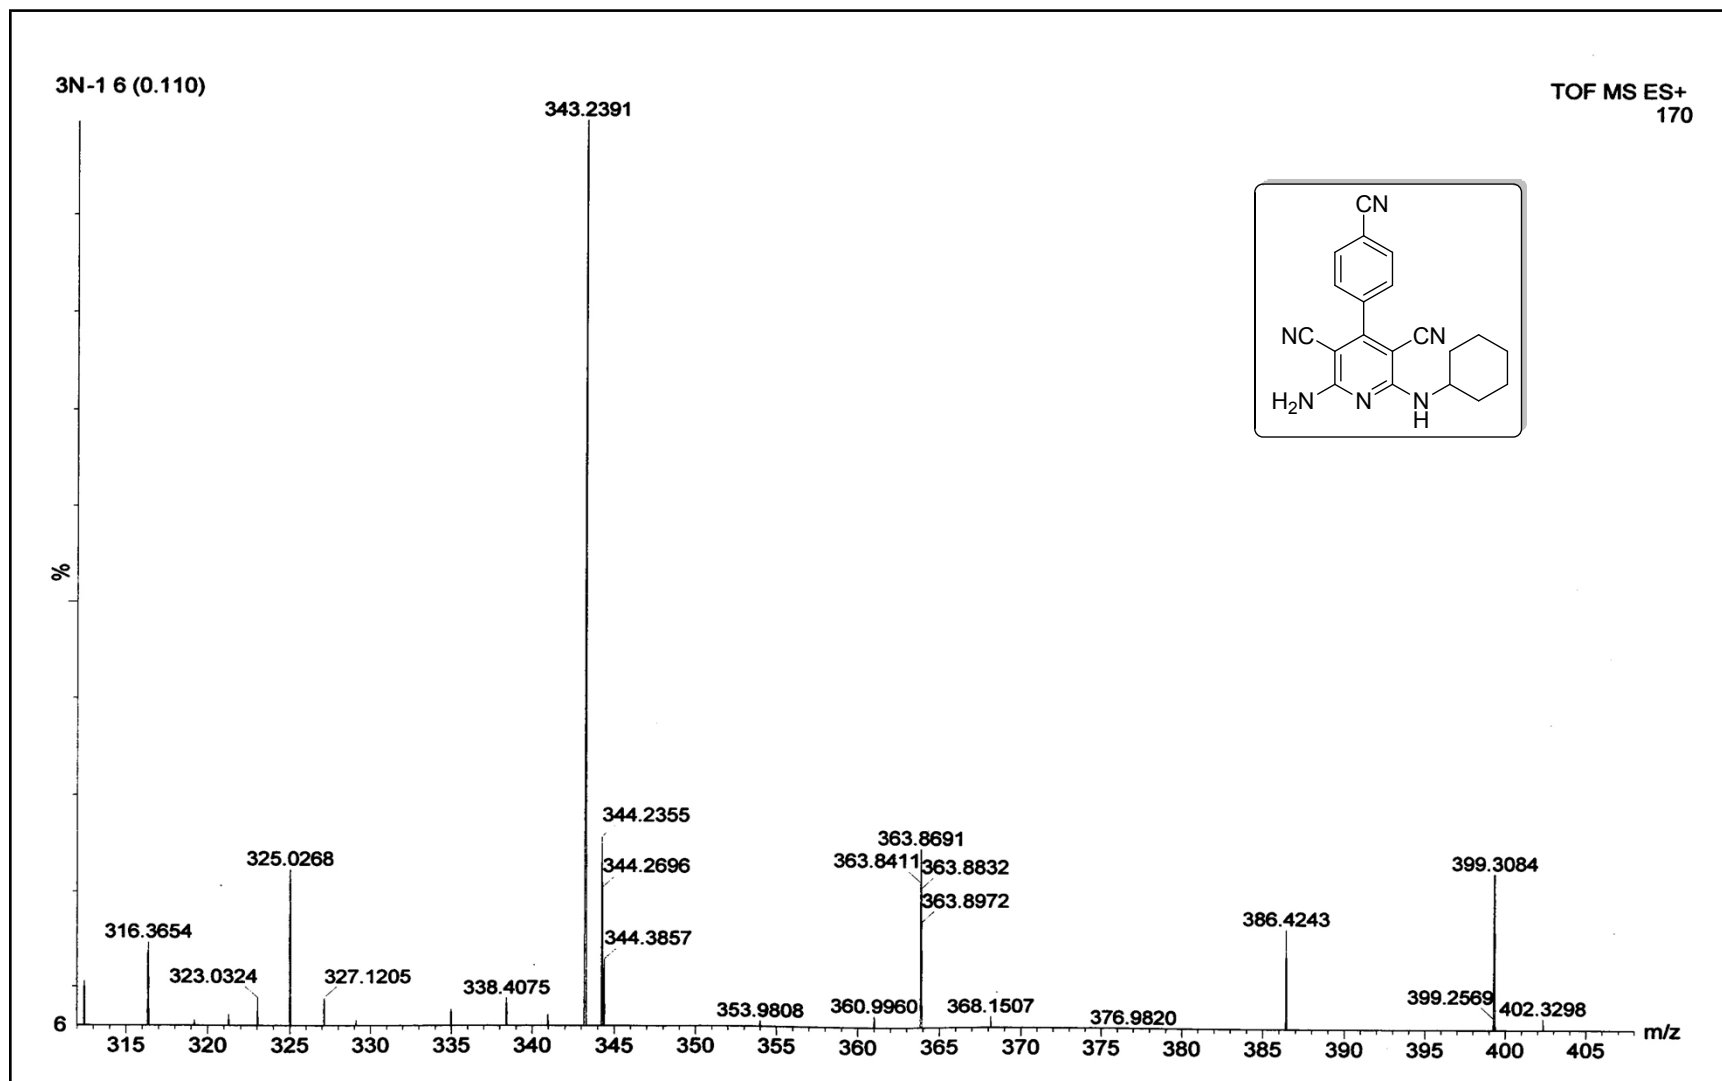

<sup>1</sup>H-NMR spectra of compound **4h**

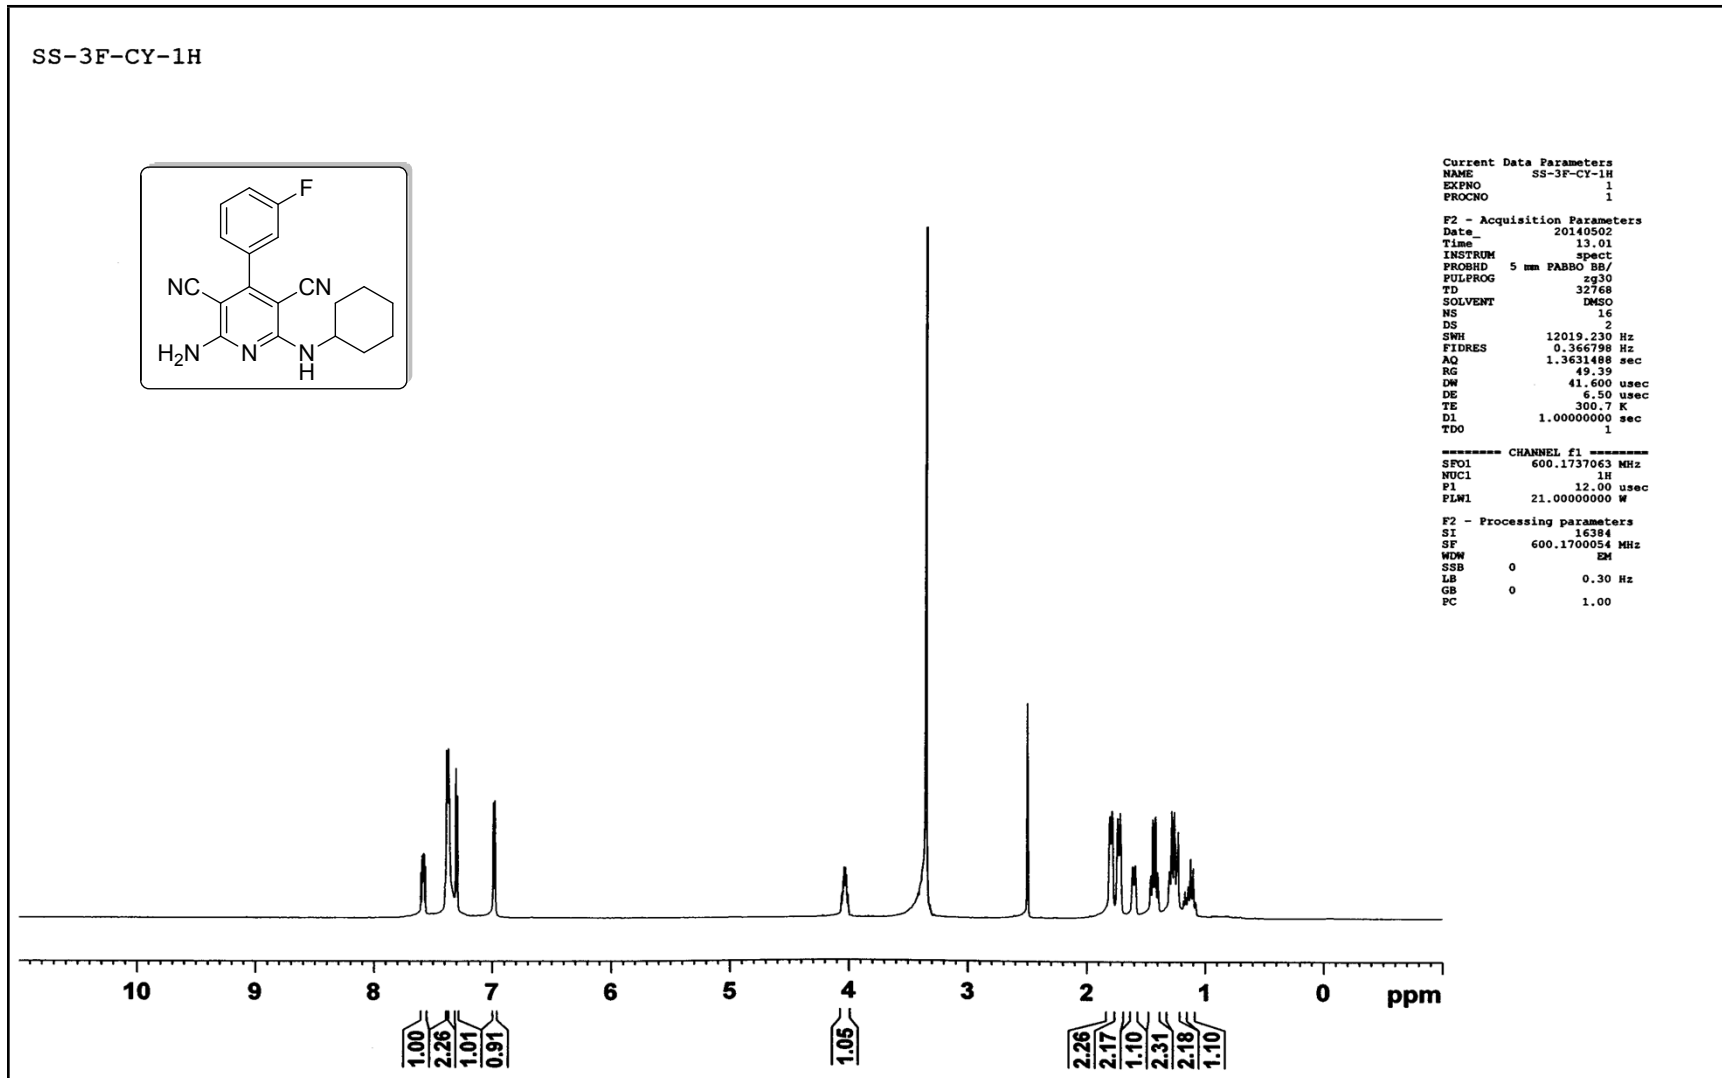

<sup>13</sup>C-NMR spectra of compound 4h

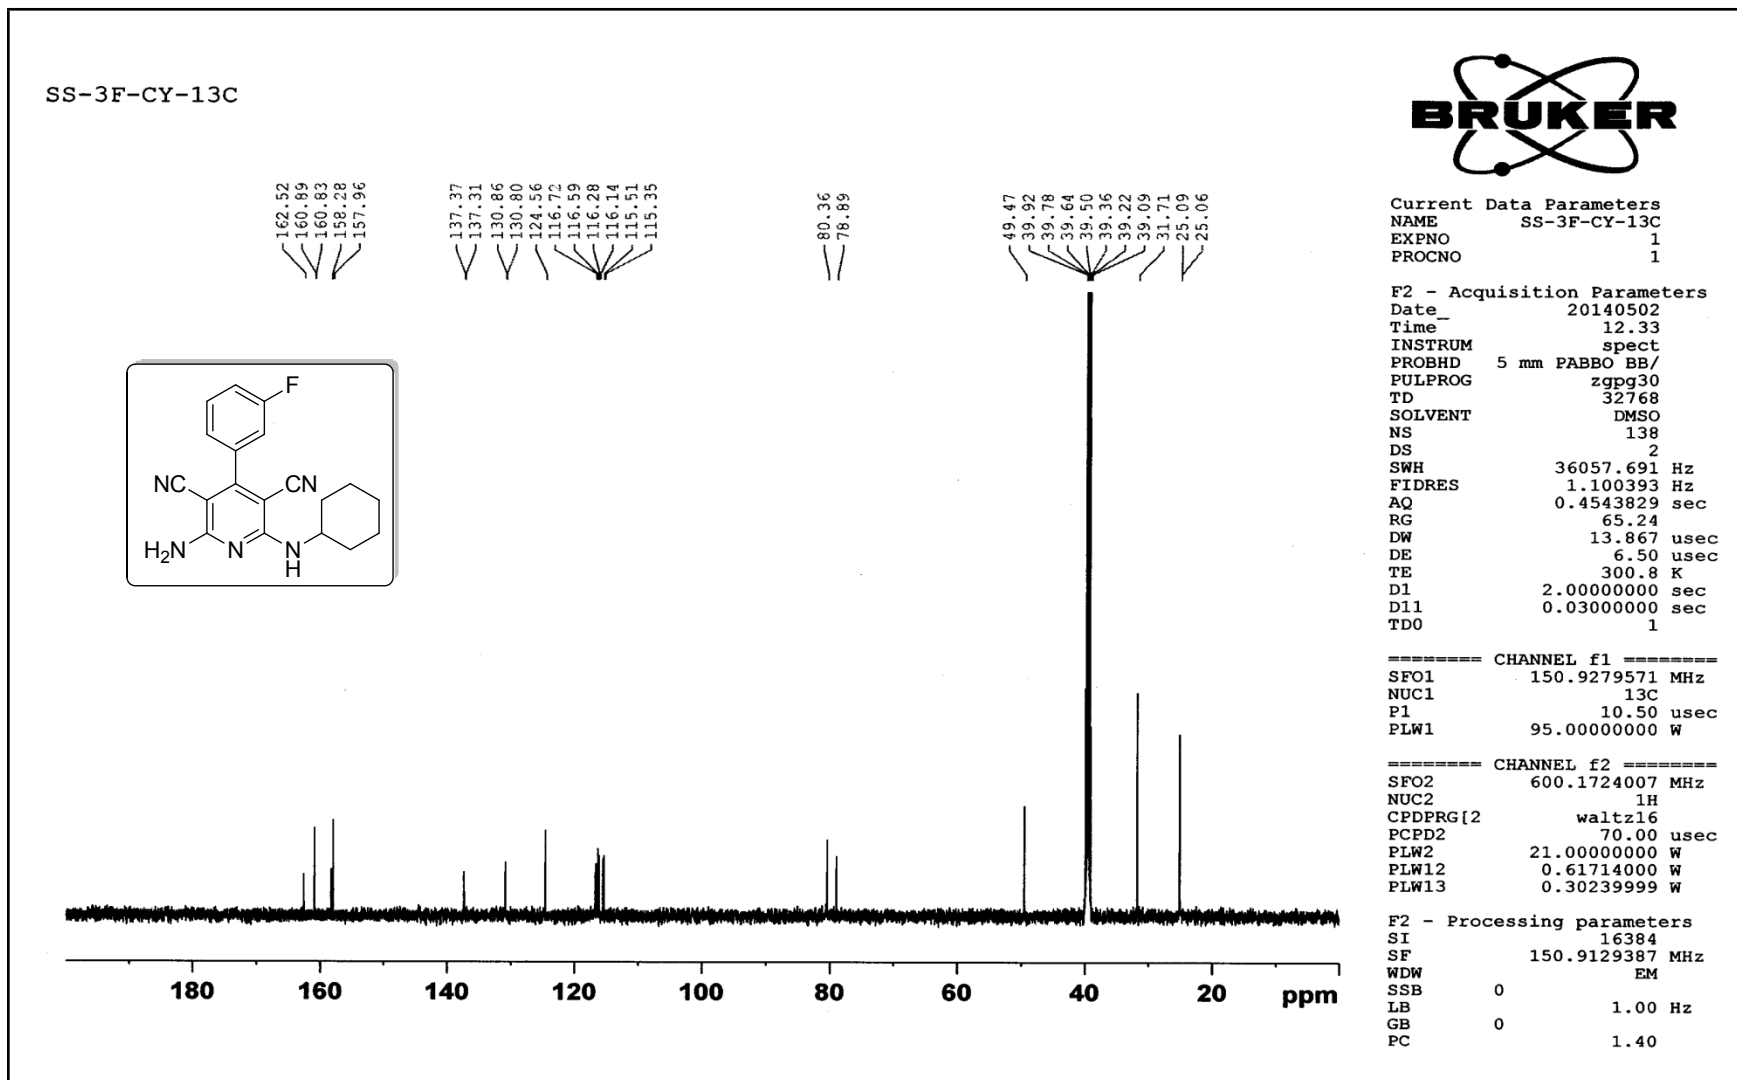



# HRMS-spectra of compound 4h

| Sample Name   | Position    | Instrument Name | User Name              |
|---------------|-------------|-----------------|------------------------|
| Inj Vol       | InjPosition | SampleType      | IRM Calibration Status |
| Data Filename | ACQ Method  | Comment         | Acquired Time          |

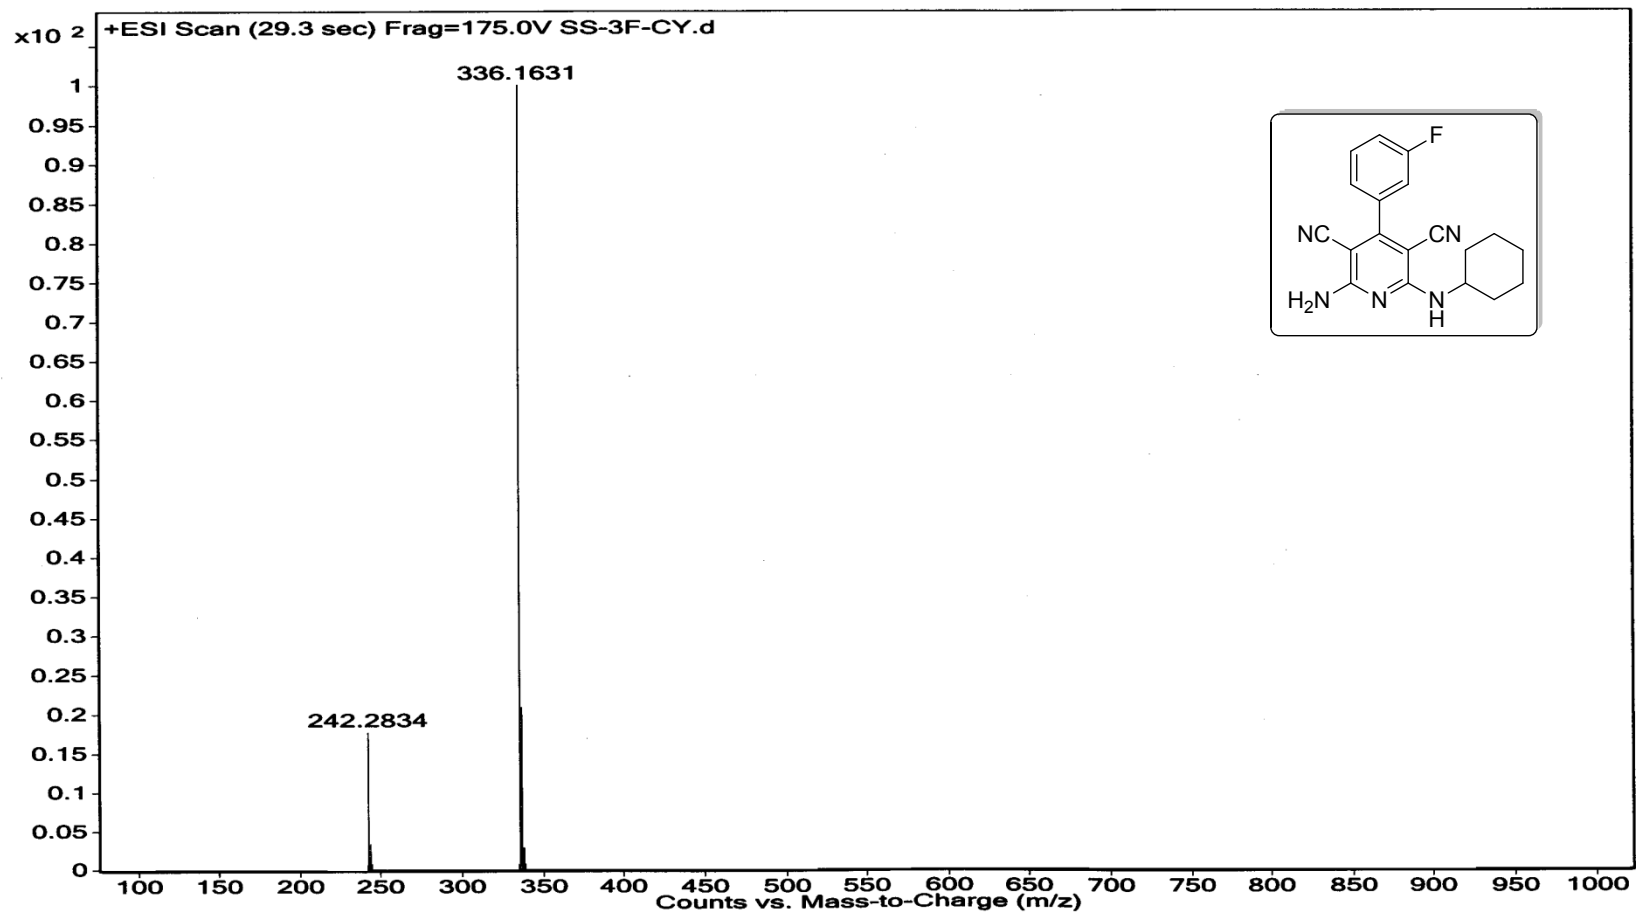

<sup>1</sup>H-NMR spectra of compound **4i**

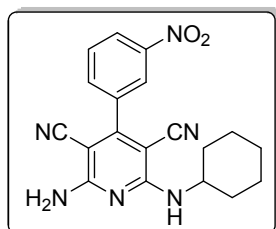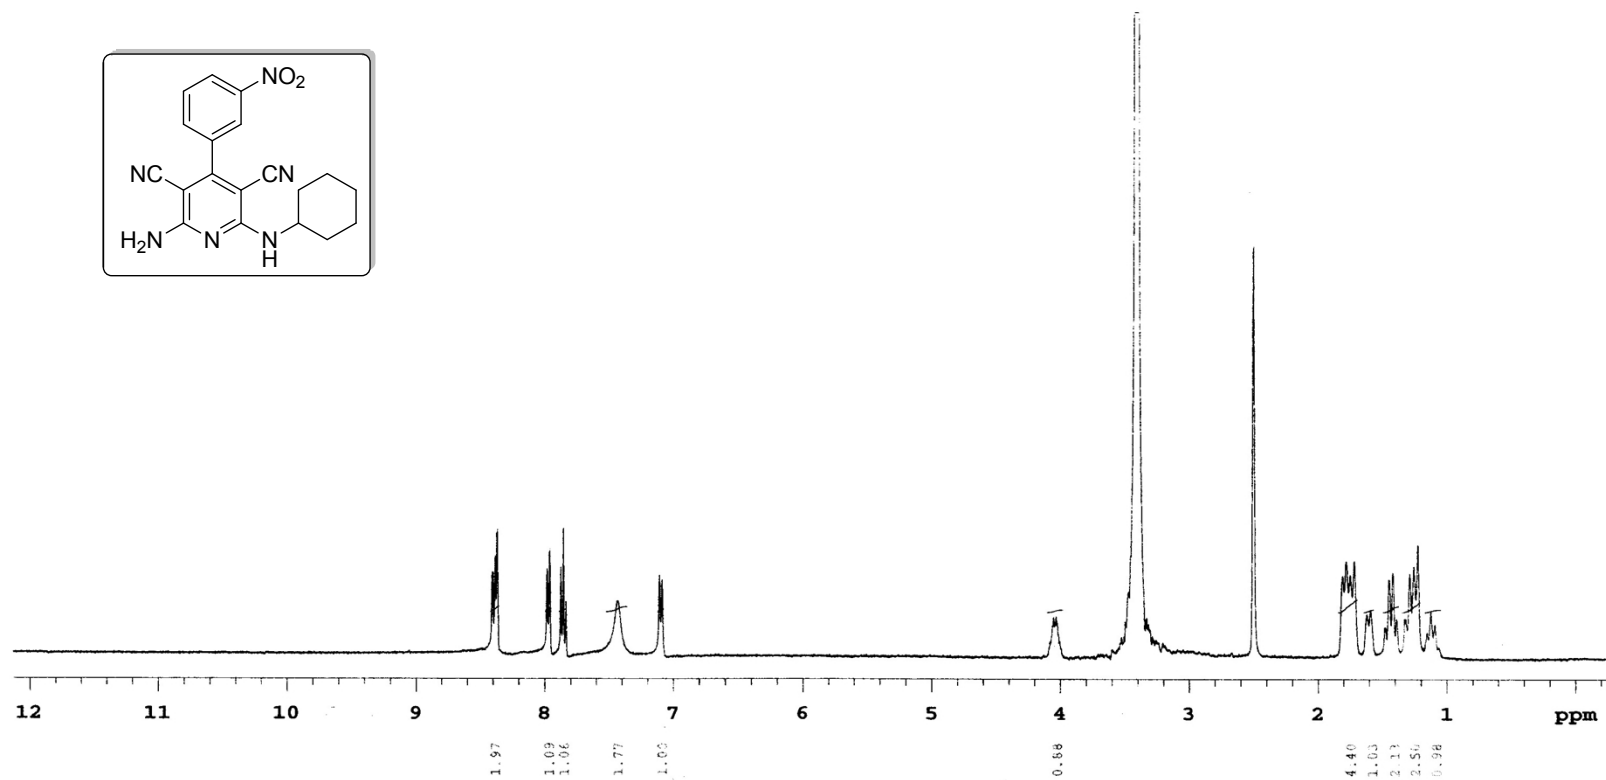

PULSE SEQUENCE  
Relax. delay 1.000 sec  
Pulse 45.0 degrees  
Acq. time 2.561 sec  
Width 6398.0 Hz  
32 repetitions

OBSERVE H1, 399.8528520

DATA PROCESSING  
FT size 32768  
Total time 1 minutes

SS-3NO2-Cy-1H

Solvent: dmsc  
Temp. 25.0 C / 298.1 K  
Operator: chem  
Mercury-400 "IITG-NMR"

<sup>13</sup>C-NMR spectra of compound 4i

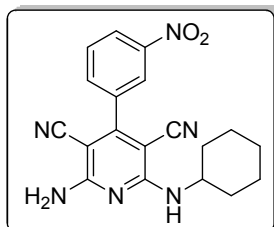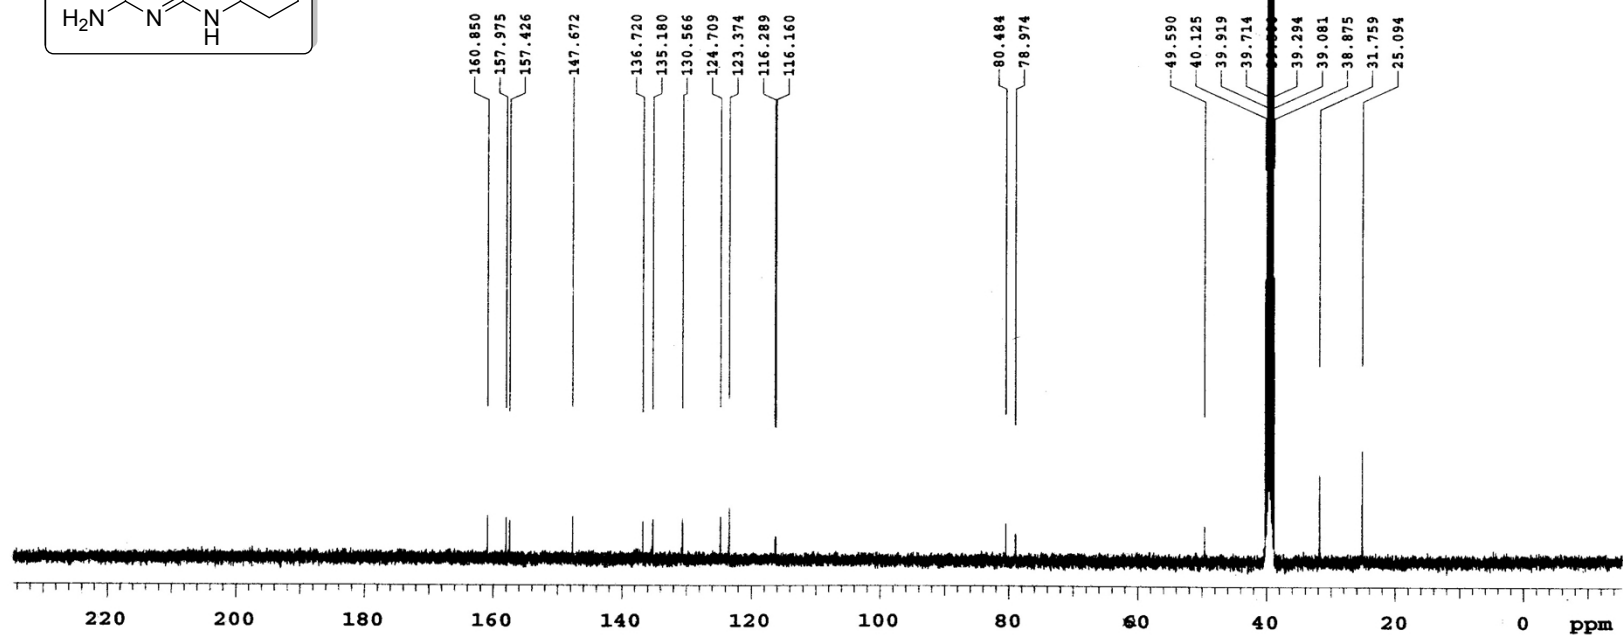

**SEQUENCE**  
 Relax delay 1.000 sec  
 Pulse 45.0 degree  
 Acq. time 1.304 sec  
 Width 25125.6 Hz  
 9050 repetitions

**OBSERVE** C13; 100.5431224  
**DECOUPLE** H1, 399.8548987  
 Power 42 dB  
 continuously on  
 WALTZ-16 modulated

**DATA PROCESSING**  
 Line broadening 0.5 Hz  
 FT size 65536  
 Total time 5.2 hours

SS-3NO2-cy-13C

Solvent: dmsd  
 Temp. 25.0 C / 298.1 K  
 Operator: chem  
 File: SS-3NO2-cy-13C  
 Mercury-400 "IITG-NMR"

HRMS spectra of compound **4i**

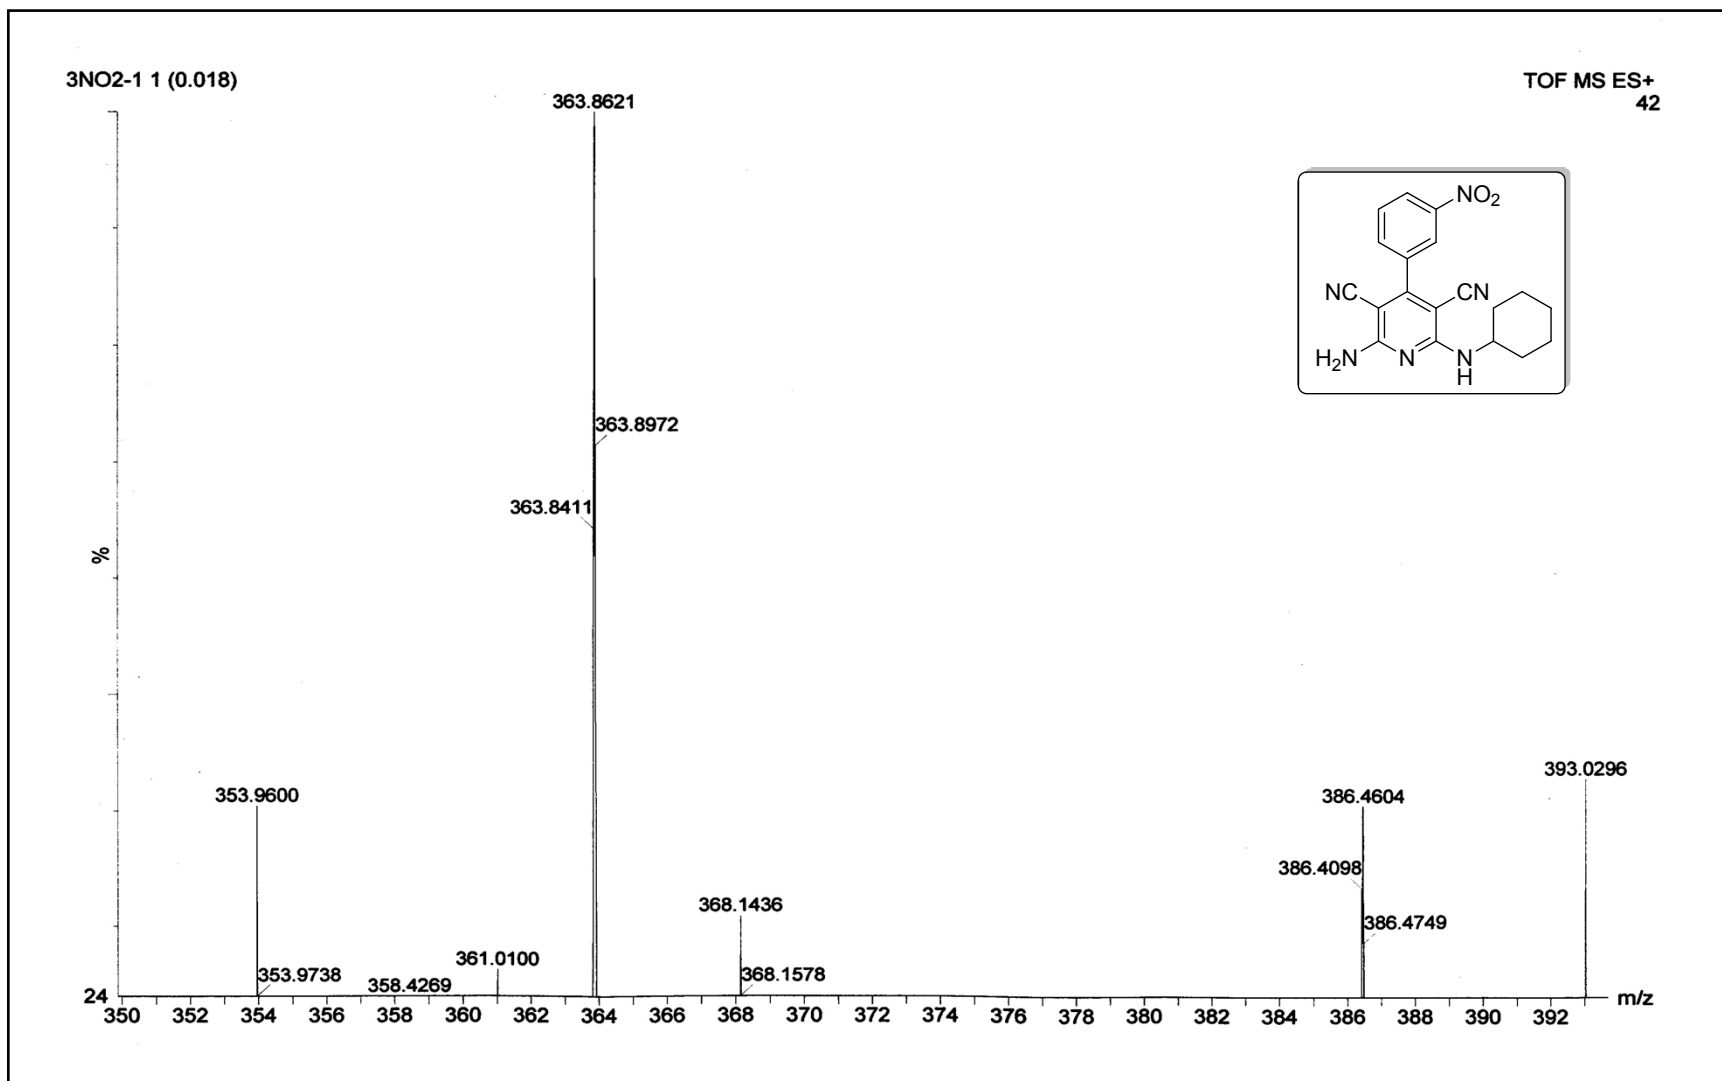

<sup>1</sup>H-NMR spectra of compound **4j**

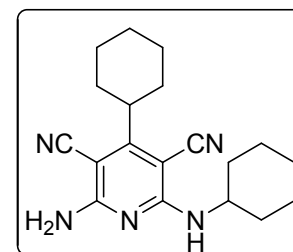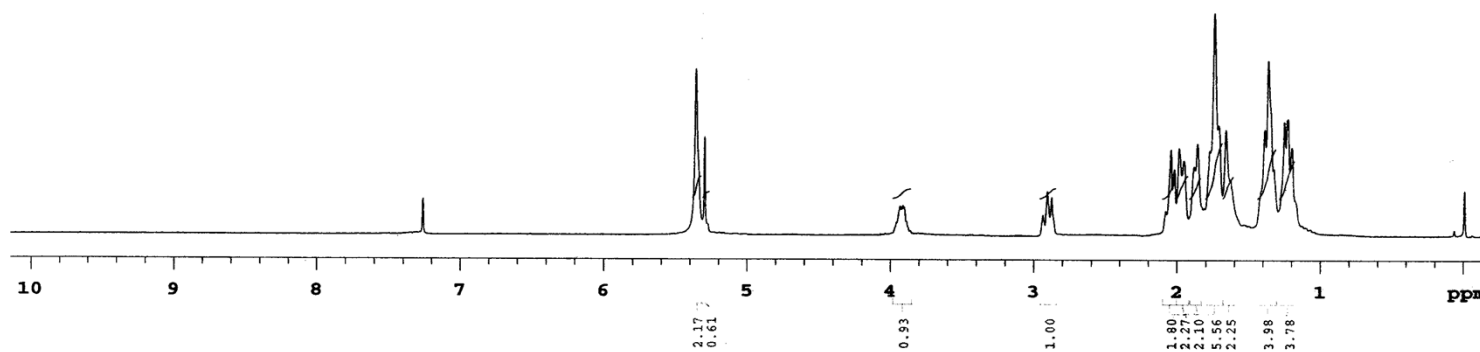

PUSE SEQUENCE: 12  
Relax. delay 1.000 sec  
Pulse 45.0 degrees  
Acq. time 2.561 sec  
Width 6398.0 Hz  
32 repetitions

DATE: 08/25/2011 10:54:59 AM  
FT size 32768  
Total time 1.1 minutes

Solvent: cdc13  
Temp. 25.0 C / 298.1 K  
Operator: chem  
Mercury 400 "1H-NMR"

<sup>13</sup>C-NMR spectra of compound 4j

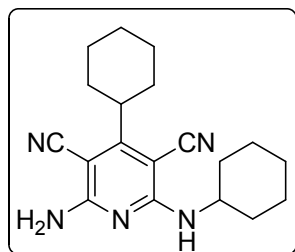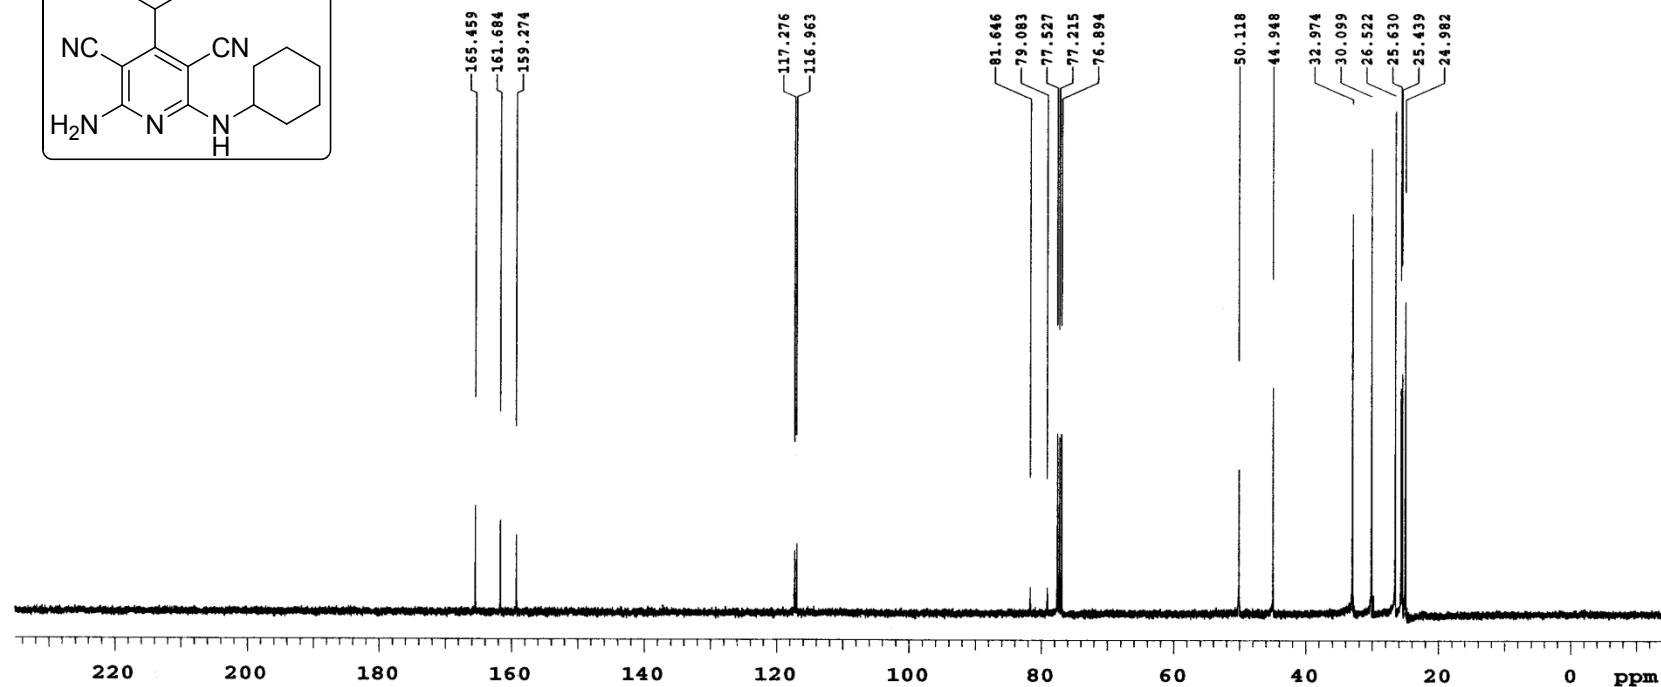

10PULSE SEQUENCE: s:DATA PROCESSING:OBSERVE:13C, 100.5425893  
Relax. delay 1.000 sec:DECOUPLE H1, 399.8529994  
Pulse 45.0 degree: size 65538:Power:42 dB  
Acq. time 1.304 sec continuously on  
Width 25125.6 Hz WALTZ-16 modulated  
980 repetitions

DATA PROCESSING:GSEACQ:13C  
Line broadening 0.5 Hz  
FT size 65536  
Total time 37 minutes

SEV:Acq-13C  
Solvent: cdcl3  
Temp. 25.0 C / 298.1 K  
Operator: chem  
Mz:Bruker-400 "IITG-NMR"

HRMS-spectra of compound 4j

| Sample Name   | Position    | Instrument Name | User Name              |
|---------------|-------------|-----------------|------------------------|
| Inj Vol       | InjPosition | SampleType      | IRM Calibration Status |
| Data Filename | ACQ Method  | Comment         | Acquired Time          |

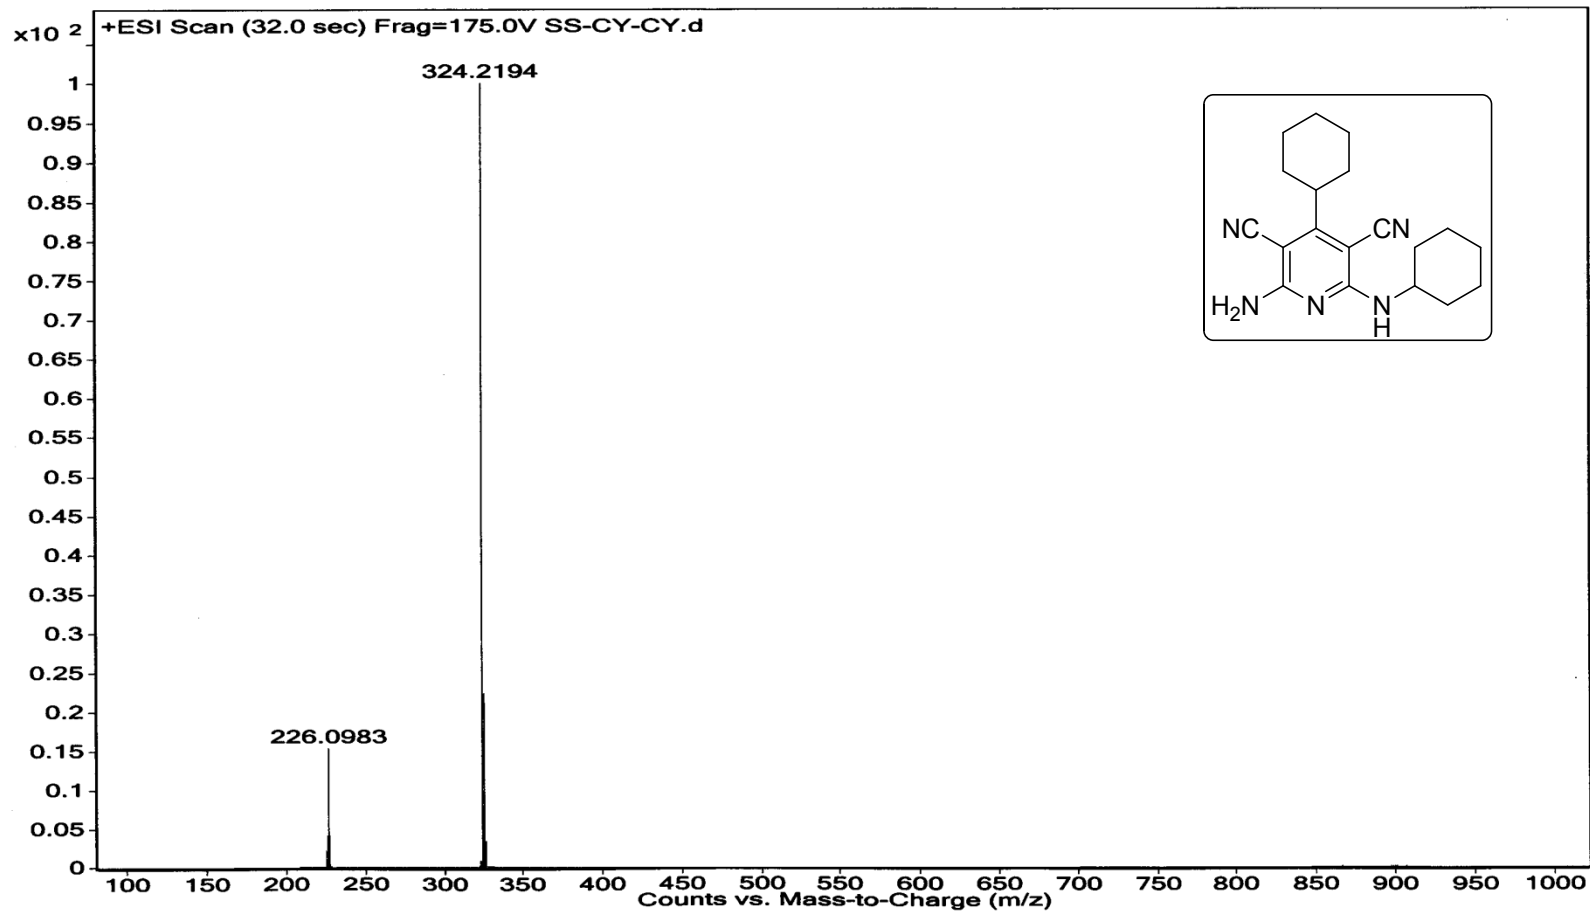

<sup>1</sup>H-NMR spectra of compound **4k**

SS-Bu-Cy-1H

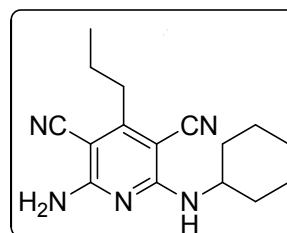

```
Current Data Parameters
NAME      SS-Bu-Cy-1H
EXPNO     1
PROCNO    1

F2 - Acquisition Parameters
Date_     20140912
Time      13.18
INSTRUM   spect
PROBHD    5 mm PABBO BB/
PULPROG   zg30
TD         32768
SOLVENT   CDCl3
NS         16
DS         2
SWH        12019.230 Hz
FIDRES     0.366798 Hz
AQ         1.3631488 sec
RG         49.39
DN         41.600 usec
DE         6.50 usec
TE         298.7 K
D1         1.00000000 sec
TDO        1

===== CHANNEL f1 =====
SFO1      600.1737063 MHz
NUC1      1H
P1         12.00 usec
PLW1      21.00000000 W

F2 - Processing parameters
SI         16384
SF         600.1700148 MHz
WDW        EM
SSB        0
LB         0.30 Hz
GB         0
PC         1.00
```

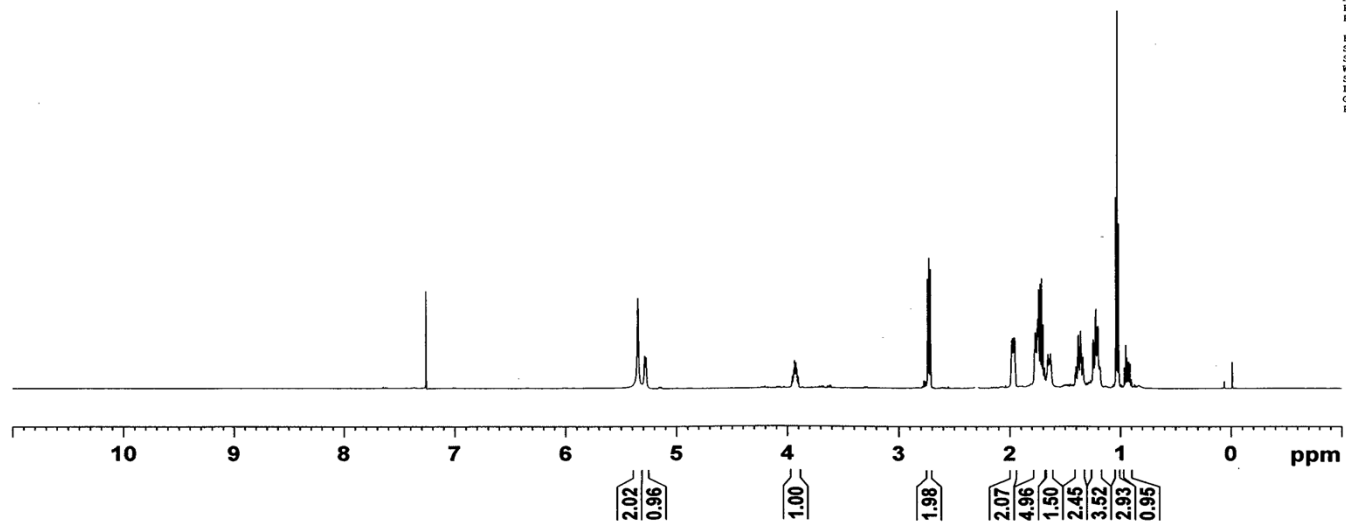



<sup>13</sup>C-NMR spectra of compound 4k

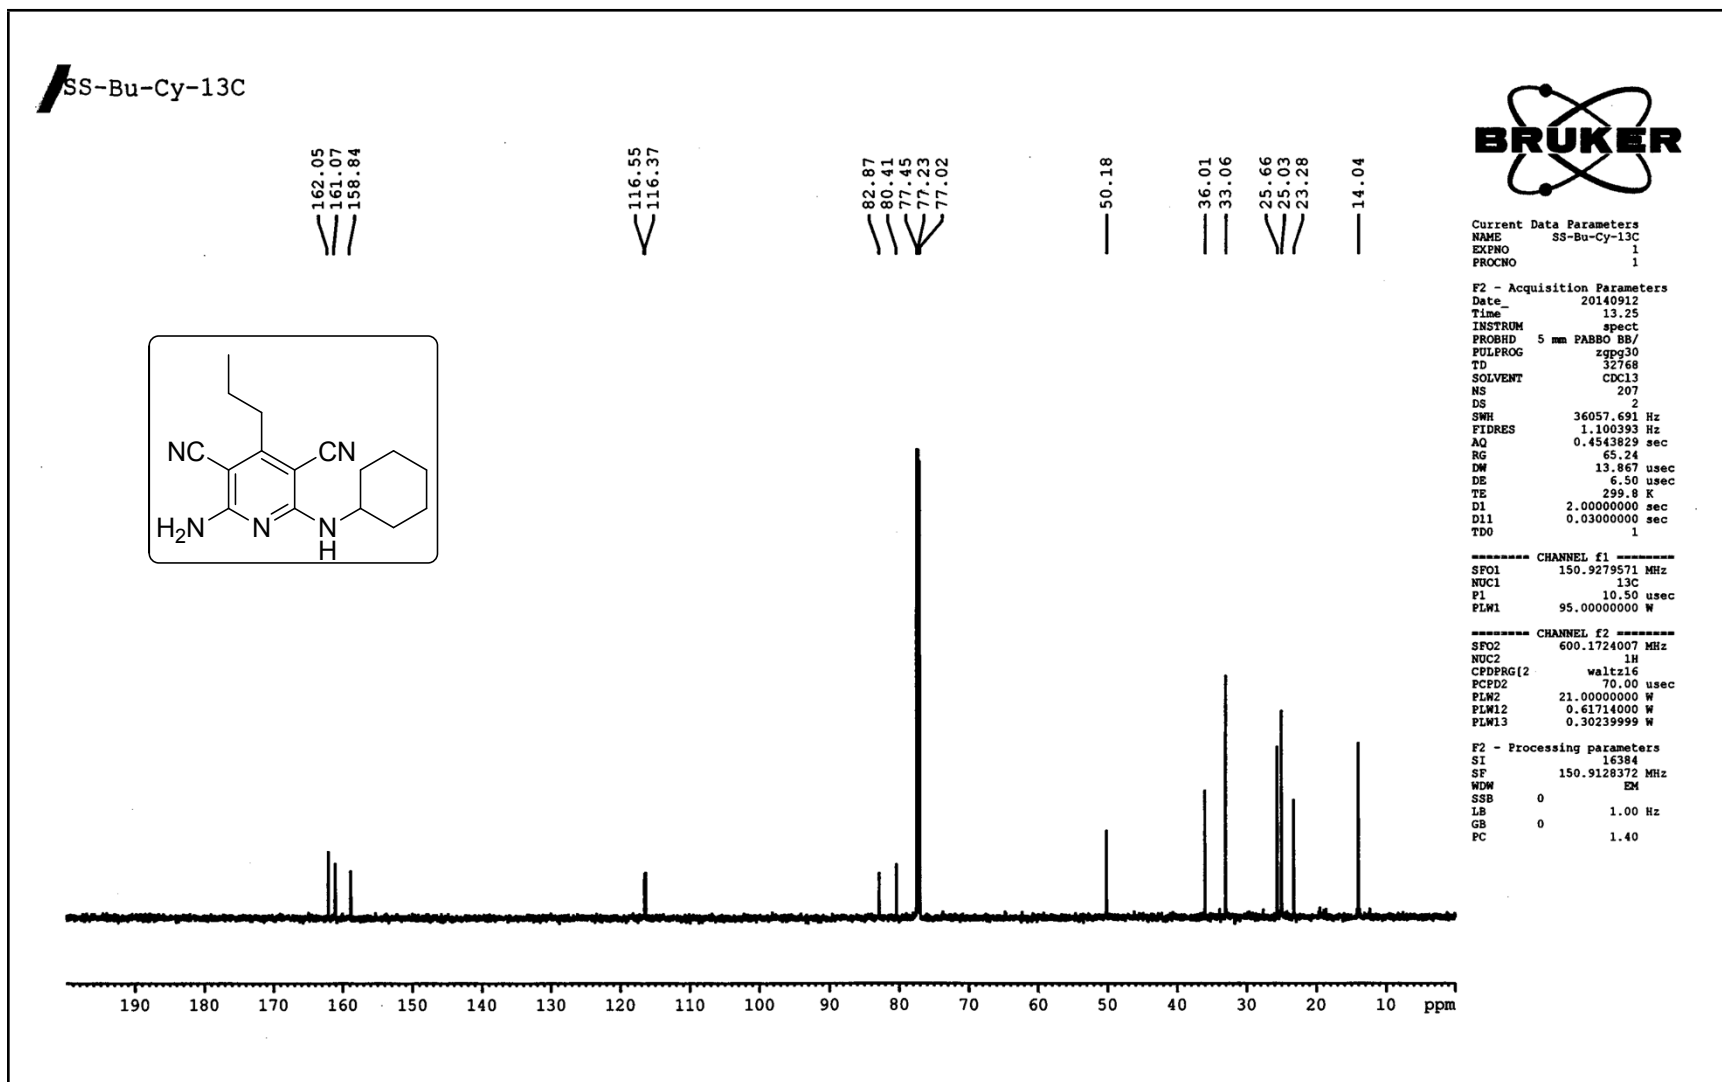

HRMS-spectra of compound 4k

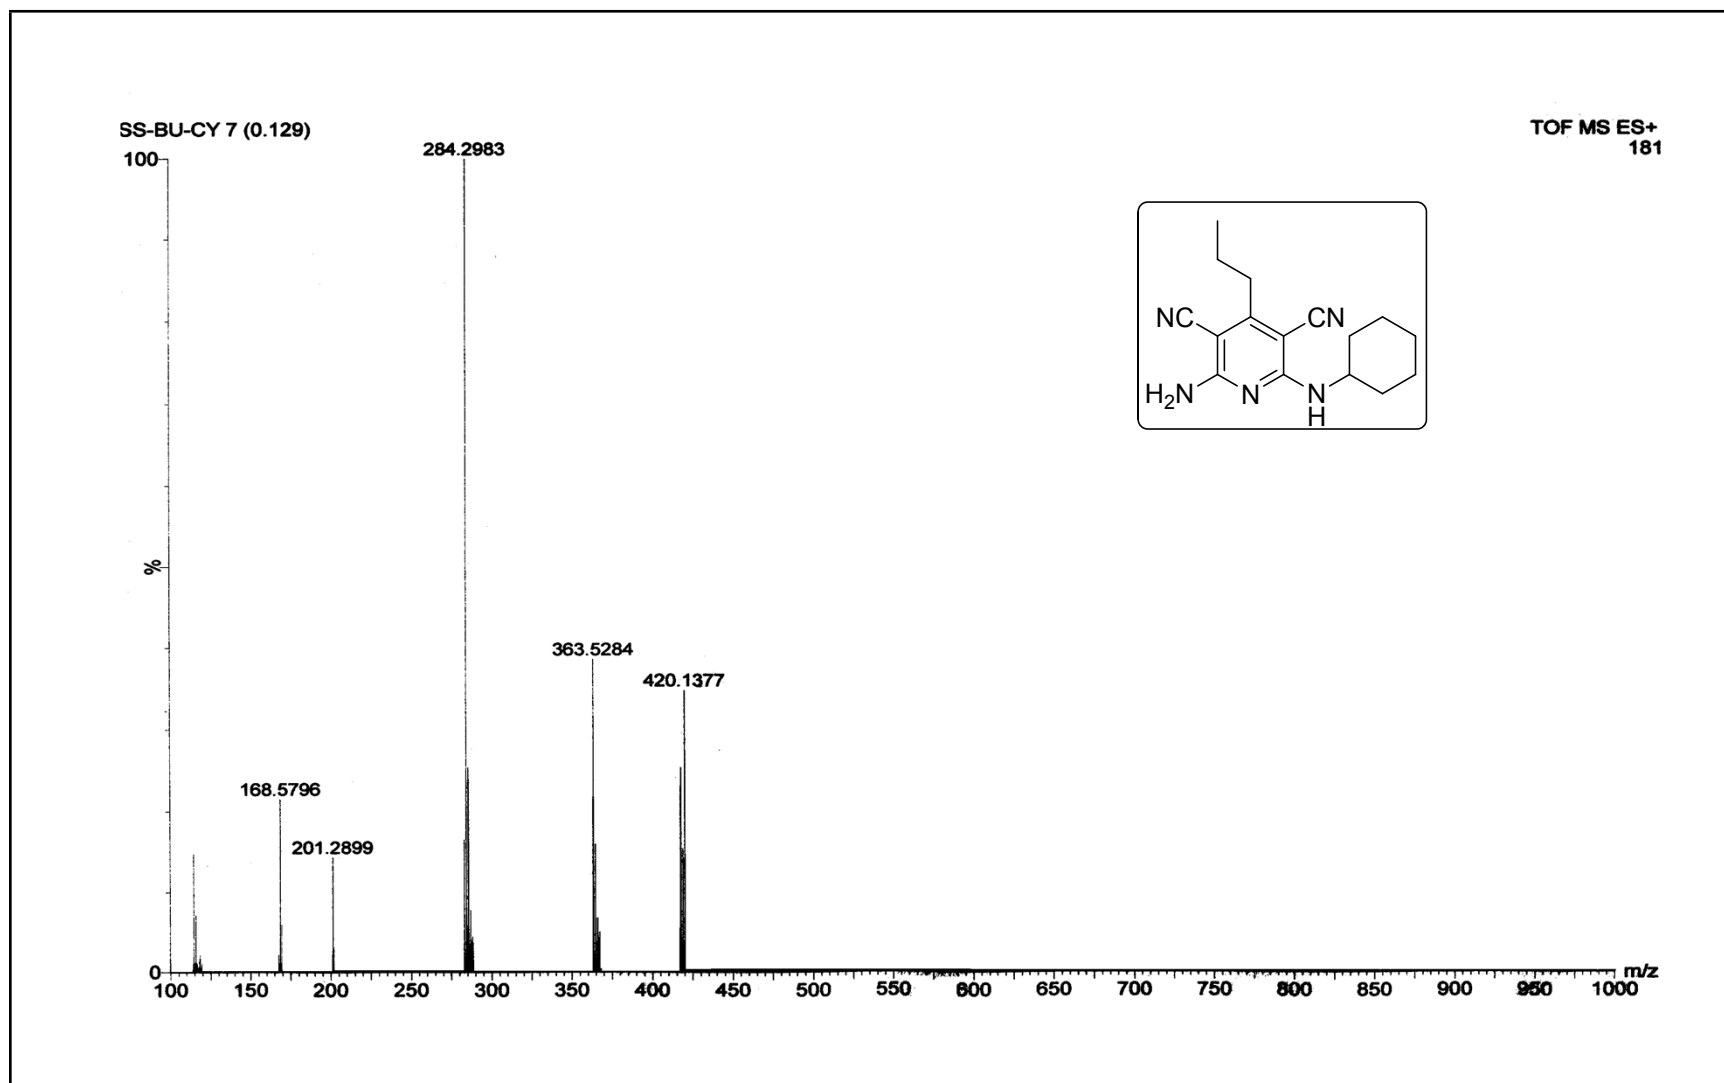

<sup>1</sup>H-NMR spectra of compound 4I

SS-3MeBu-Cy\_1H

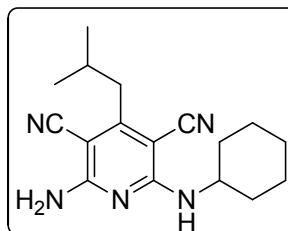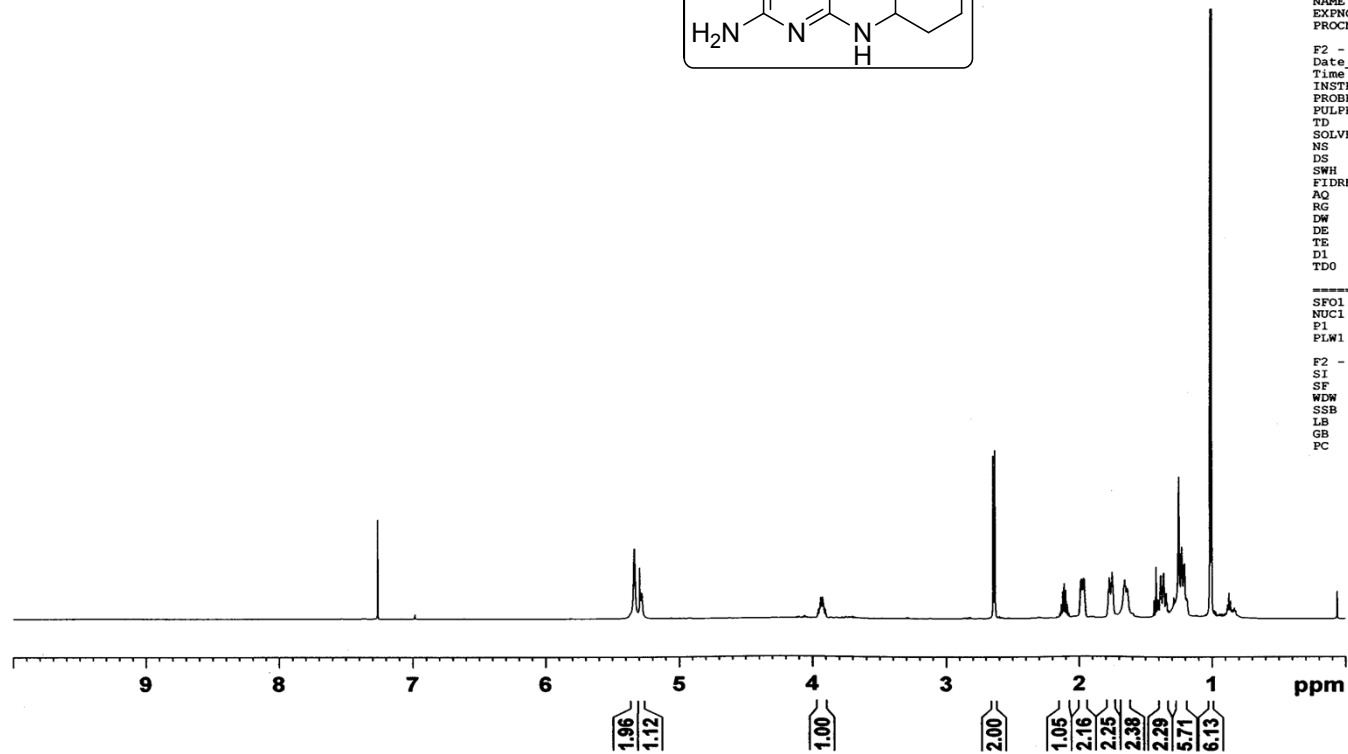

Current Data Parameters  
NAME SS-3MeBu-Cy\_1H  
EXPNO 1  
PROCNO 1

F2 - Acquisition Parameters  
Date\_ 20140918  
Time 15.11  
INSTRUM spect  
PROBHD 5 mm PABBO BB/  
PULPROG zg30  
TD 32768  
SOLVENT CDCl3  
NS 16  
DS 2  
SWH 12019.230 Hz  
FIDRES 0.366798 Hz  
AQ 1.3631488 sec  
RG 54.94  
DW 41.600 usec  
DE 6.50 usec  
TE 298.4 K  
D1 1.00000000 sec  
TDO 1

----- CHANNEL f1 -----  
SF01 600.1737063 MHz  
NUC1 1H  
P1 12.00 usec  
PLW1 21.00000000 W

F2 - Processing parameters  
SI 16384  
SF 600.1700149 MHz  
WDW EM  
SSB 0  
LB 0.30 Hz  
GB 0  
PC 1.00

<sup>13</sup>C-NMR spectra of compound 4l

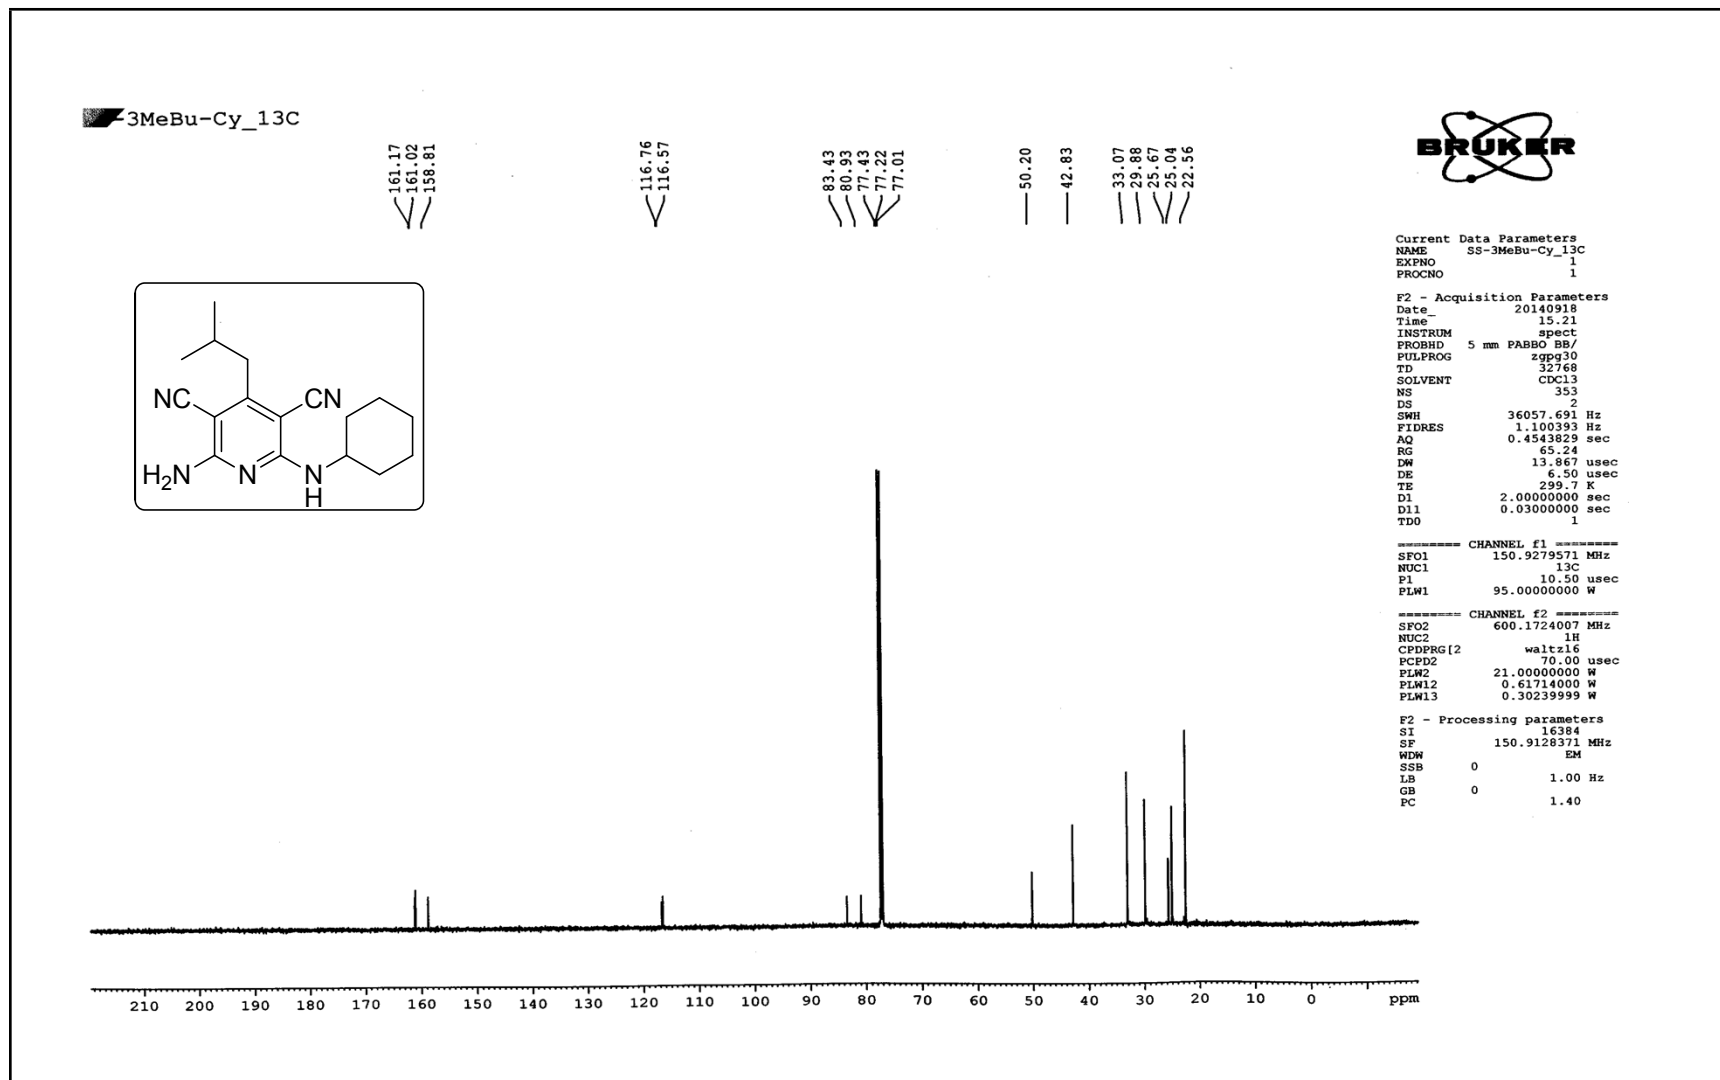

<sup>1</sup>H-NMR spectra of compound 4m

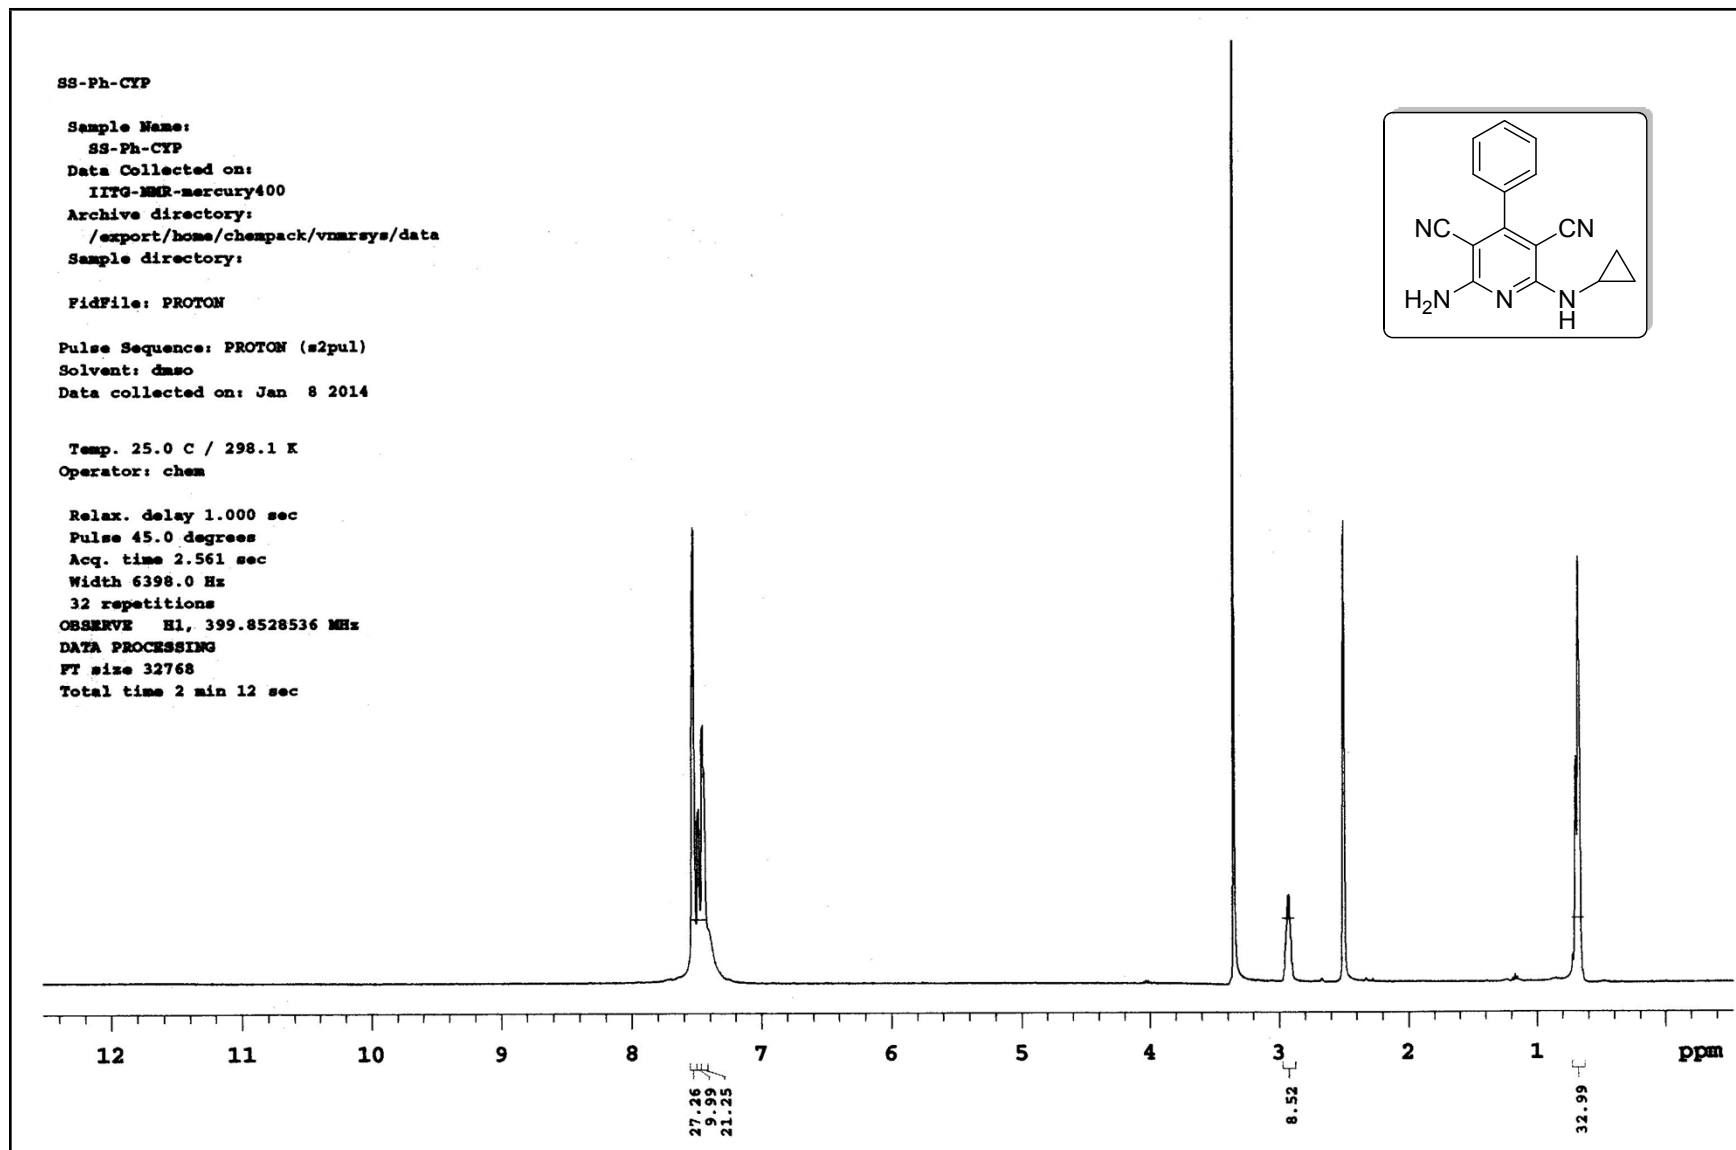

<sup>13</sup>C-NMR spectra of compound 4m

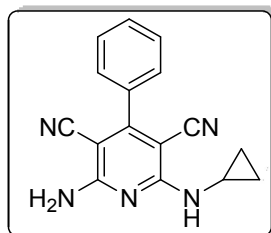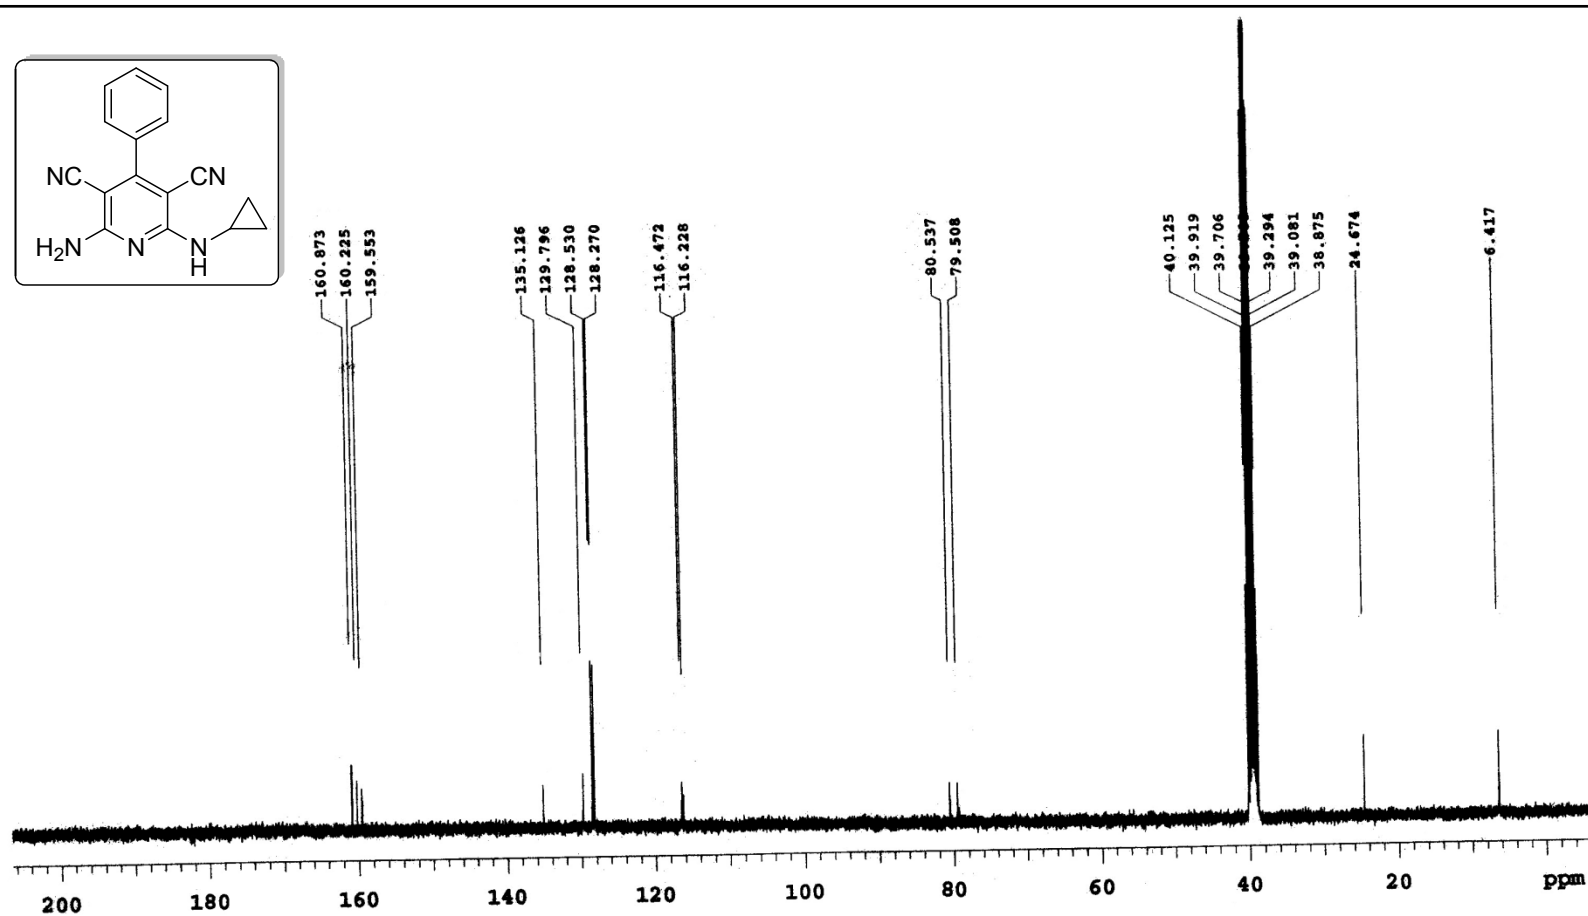

**PULSE SEQUENCE**  
 Relax. delay 1.000 sec  
 Pulse 45.0 degrees  
 Acq. time 1.304 sec  
 Width 25125.6 Hz  
 5240 repetitions

**OBSERVE** C13, 100.5431285  
**DECOUPLE** H1, 399.8548987  
 Power 42 dB  
 continuously on  
 WALTZ-16 modulated

**DATA PROCESSING**  
 Line broadening 0.5 Hz  
 FT size 65536  
 Total time 3.4 hours

**SS-Ph-CyP-13C**  
 Solvent: dmsc  
 Temp. 25.0 C / 298.1 K  
 Operator: chem  
 Mercury-400 "IITG-NMR"

HRMS-spectra of compound **4m**

Sample Name  
Inj Vol  
Data Filename

Position  
InjPosition  
ACQ Method

Instrument Name  
SampleType  
Comment

User Name  
IRM Calibration Status  
Acquired Time

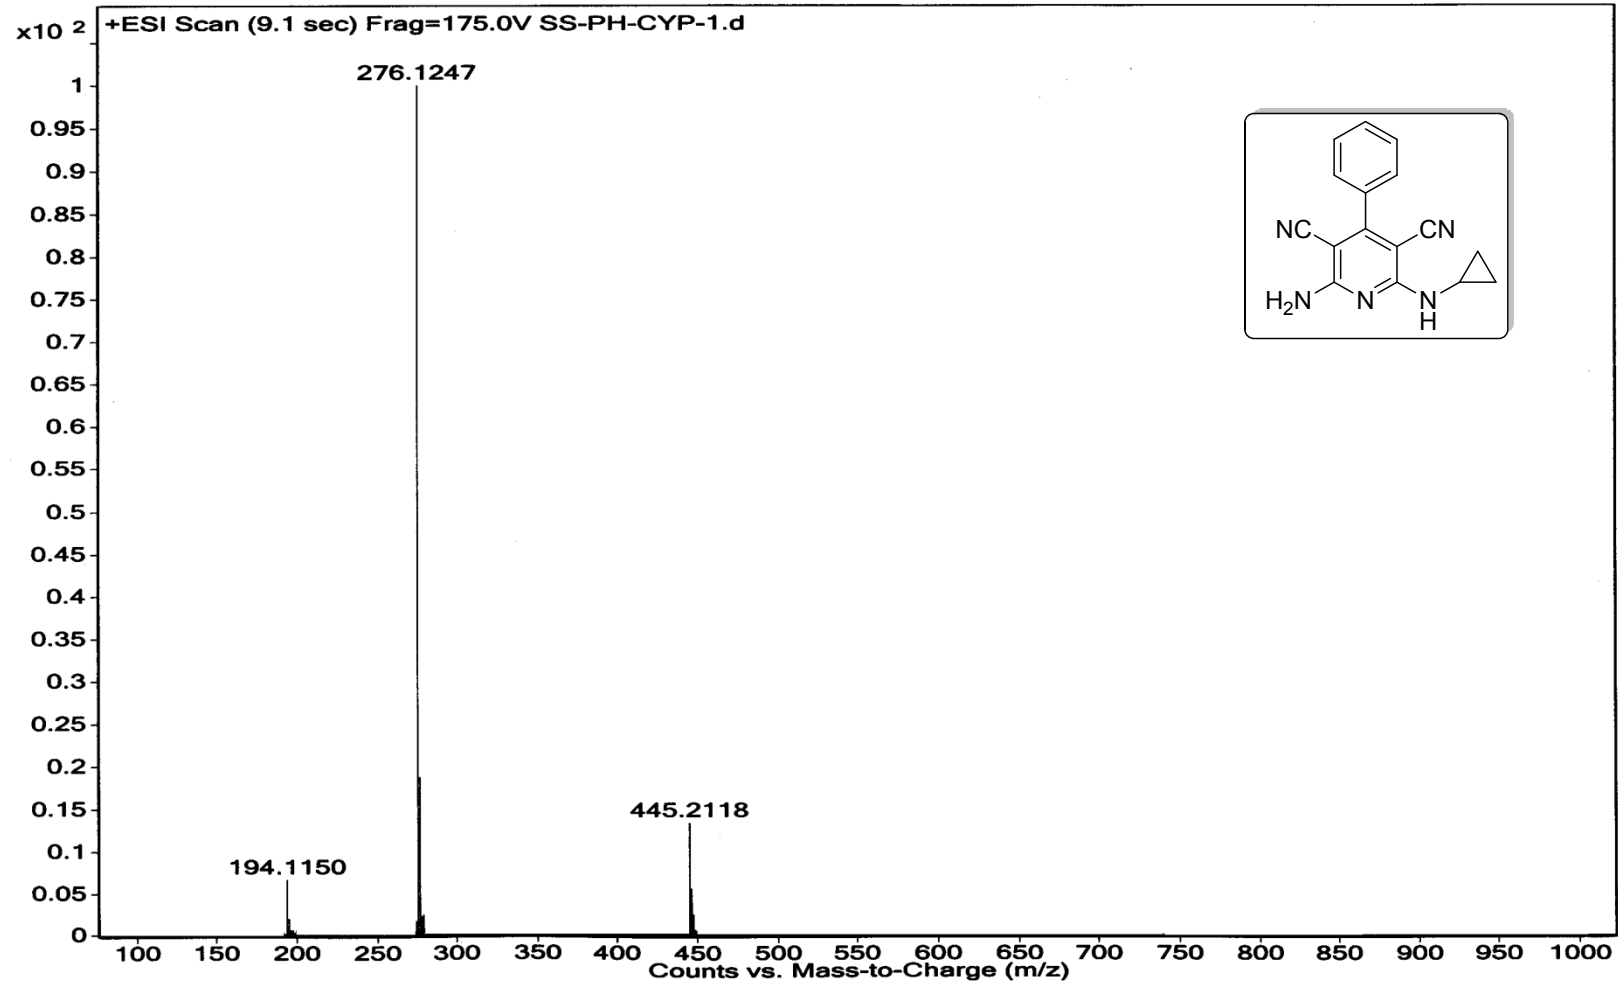



<sup>1</sup>H-NMR spectra of compound 4n

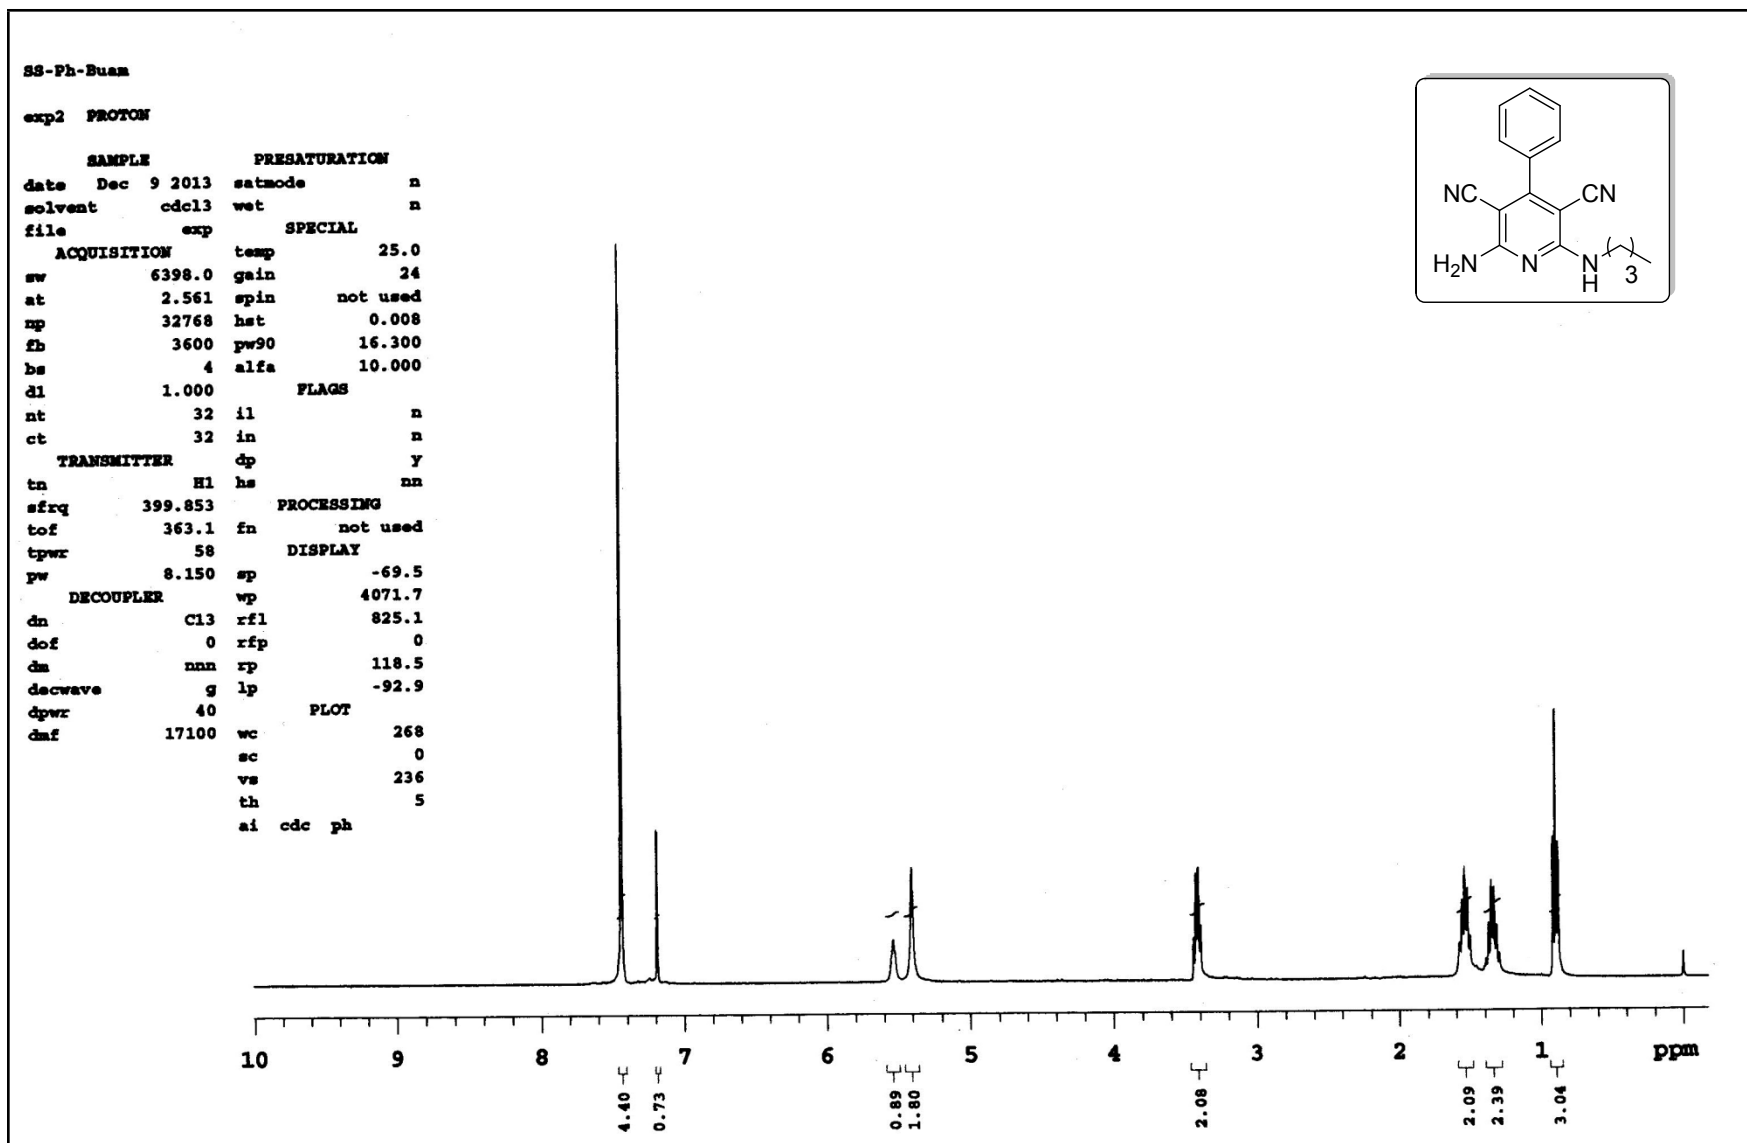

<sup>13</sup>C-NMR spectra of compound 4n

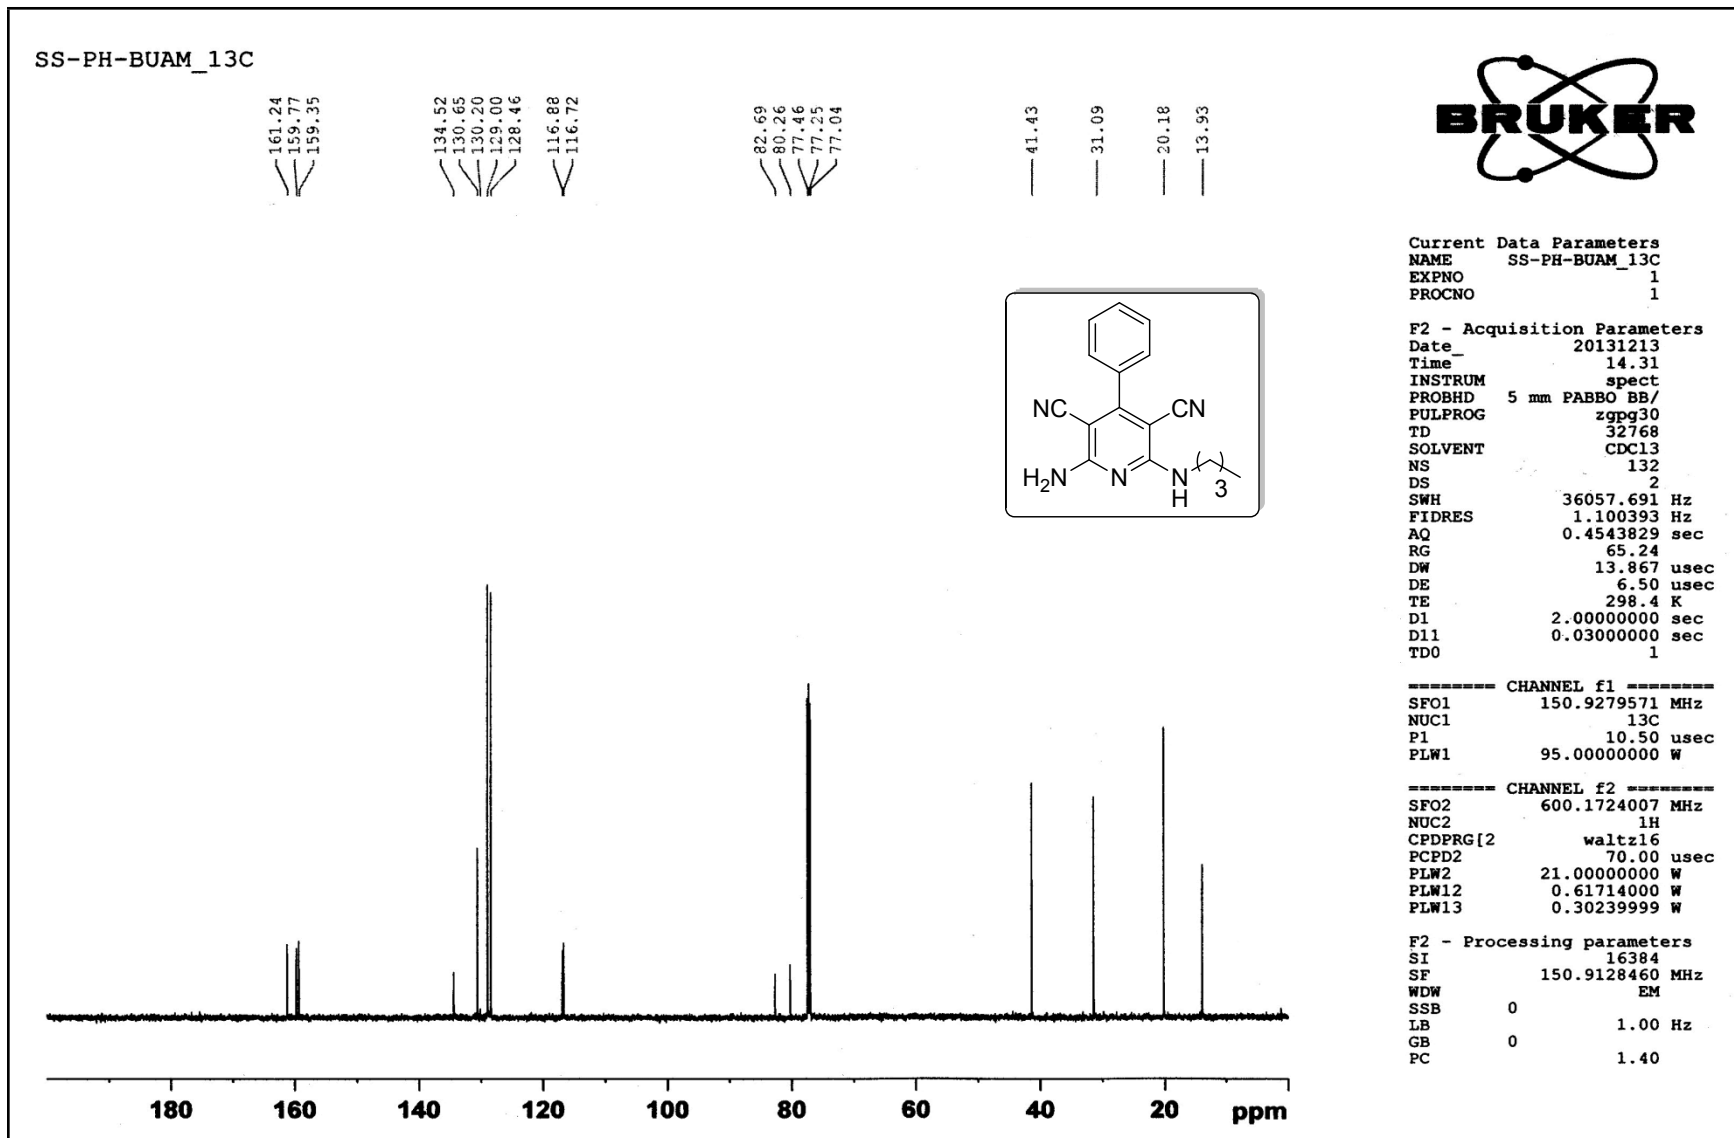

<sup>1</sup>H-NMR spectra of compound **4o**

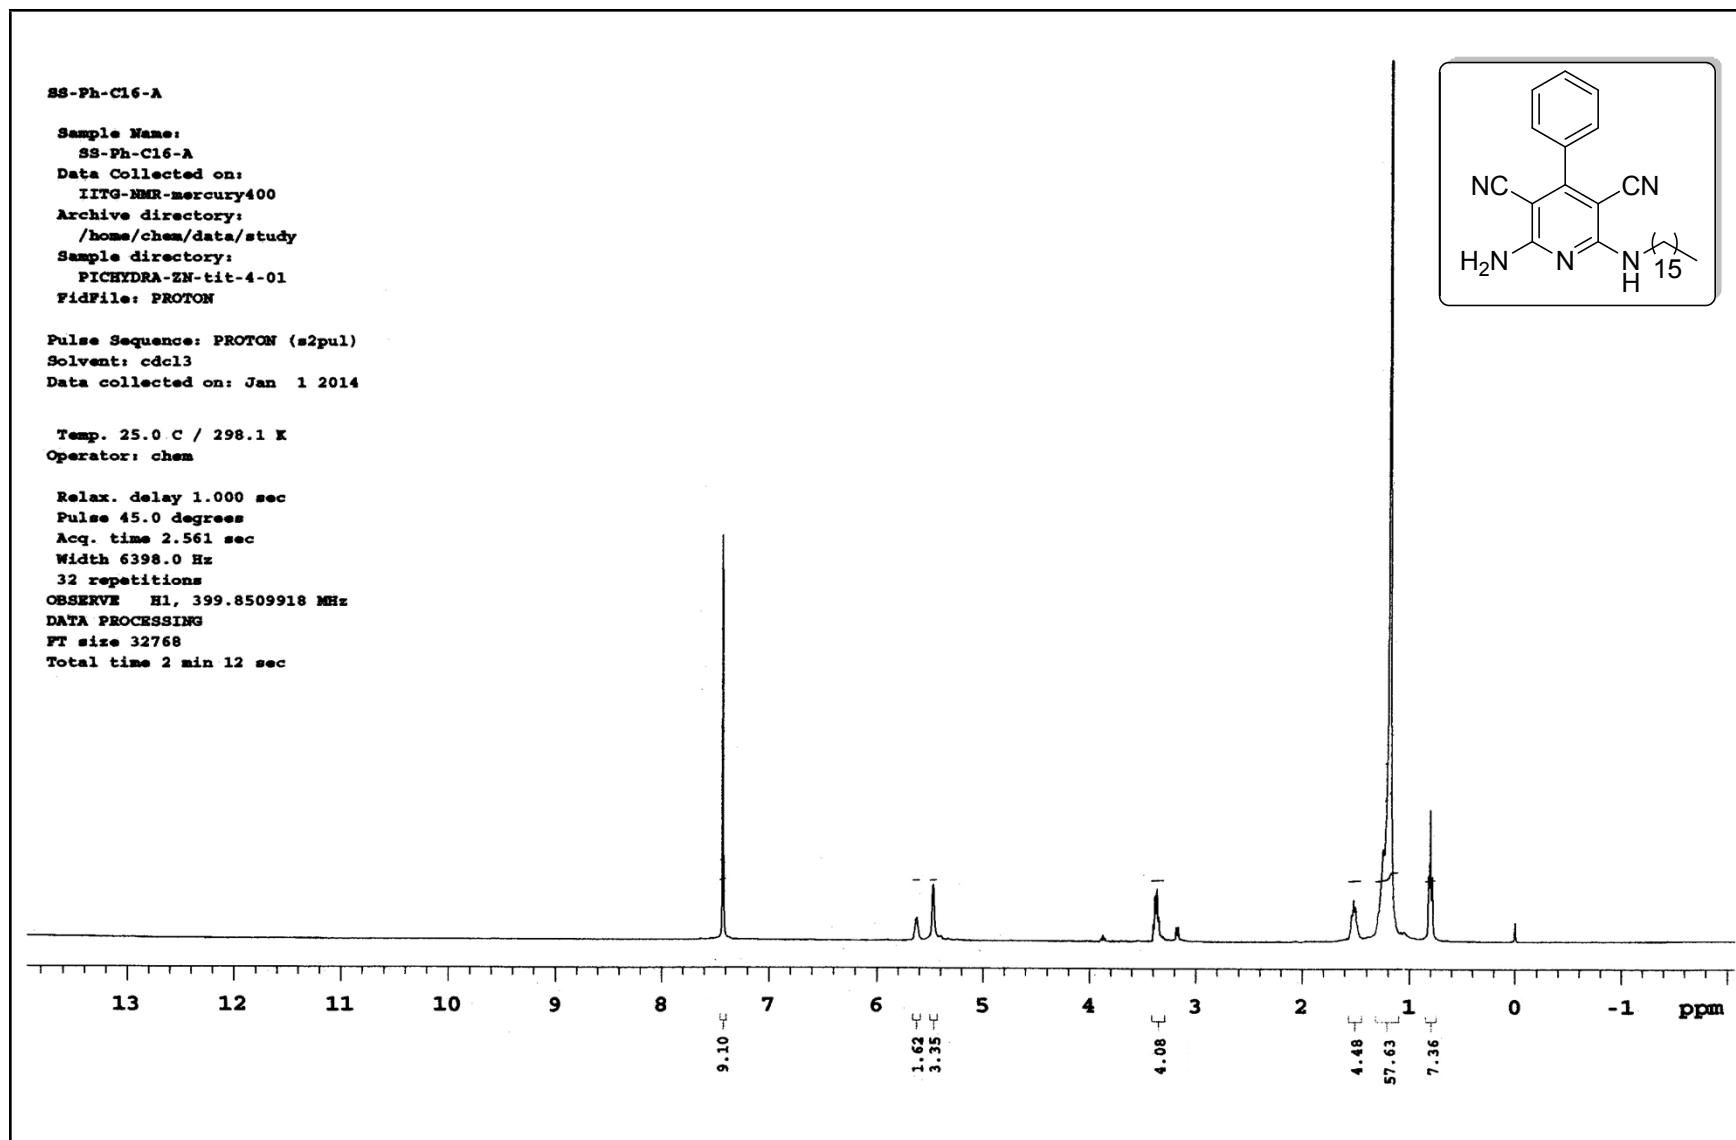

<sup>13</sup>C-NMR spectra of compound **4o**

SS-Ph-C16-A\_13C

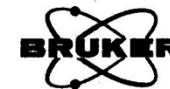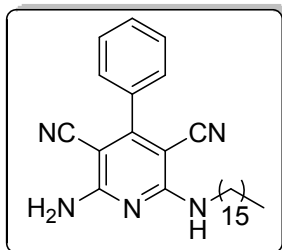

161.22  
159.72  
159.29

134.52  
129.34  
129.28  
128.94  
128.84  
128.43  
116.84  
116.68

82.62  
80.19  
77.44  
77.23  
77.02

41.71  
36.74  
32.05  
29.82  
29.74  
29.67  
29.49  
29.44  
29.37  
27.00  
25.10  
22.81  
14.25

Current Data Parameters  
NAME SS-Ph-C16-A\_13C  
EXPNO 1  
PROCNO 1

F2 - Acquisition Parameters  
Date\_ 20140116  
Time 13.27  
INSTRUM spect  
PROBHD 5 mm PABBO BB/  
PULPROG zgpg30  
TD 32768  
SOLVENT CDCl3  
NS 64  
DS 2  
SWH 36057.691 Hz  
FIDRES 1.100393 Hz  
AQ 0.4543829 sec  
RG 65.24  
DW 13.867 usec  
DE 6.50 usec  
TE 300.0 K  
D1 2.0000000 sec  
D11 0.03000000 sec  
TDO 1

----- CHANNEL f1 -----  
SFO1 150.9279571 MHz  
NUC1 13C  
P1 10.50 usec  
PLW1 95.00000000 W

----- CHANNEL f2 -----  
SFO2 600.1724007 MHz  
NUC2 1H  
CPCPDS2 waltz16  
PCPD2 70.00 usec  
PLW2 21.00000000 W  
PLW12 0.61714000 W  
PLW13 0.30239999 W

F2 - Processing parameters  
SI 16384  
SF 150.9128496 MHz  
WDW EM  
SSB 0  
LB 1.00 Hz  
GB 0  
PC 1.40

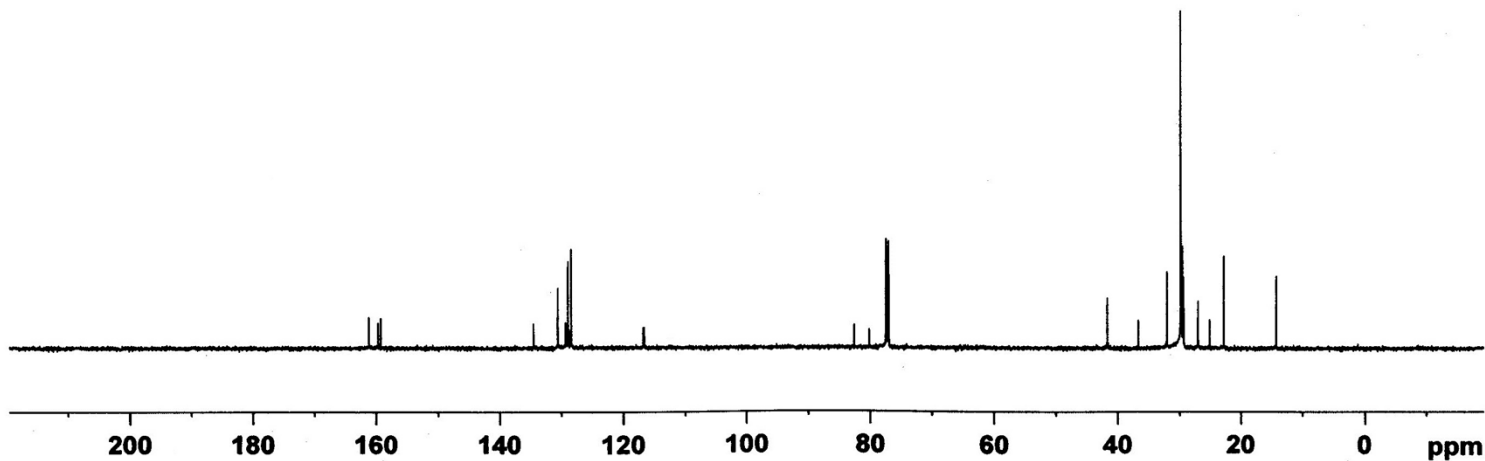

HRMS-spectra of compound 4o

Sample Name  
Inj Vol  
Data Filename

Position  
InjPosition  
ACQ Method

Instrument Name  
SampleType  
Comment

User Name  
IRM Calibration Status  
Acquired Time

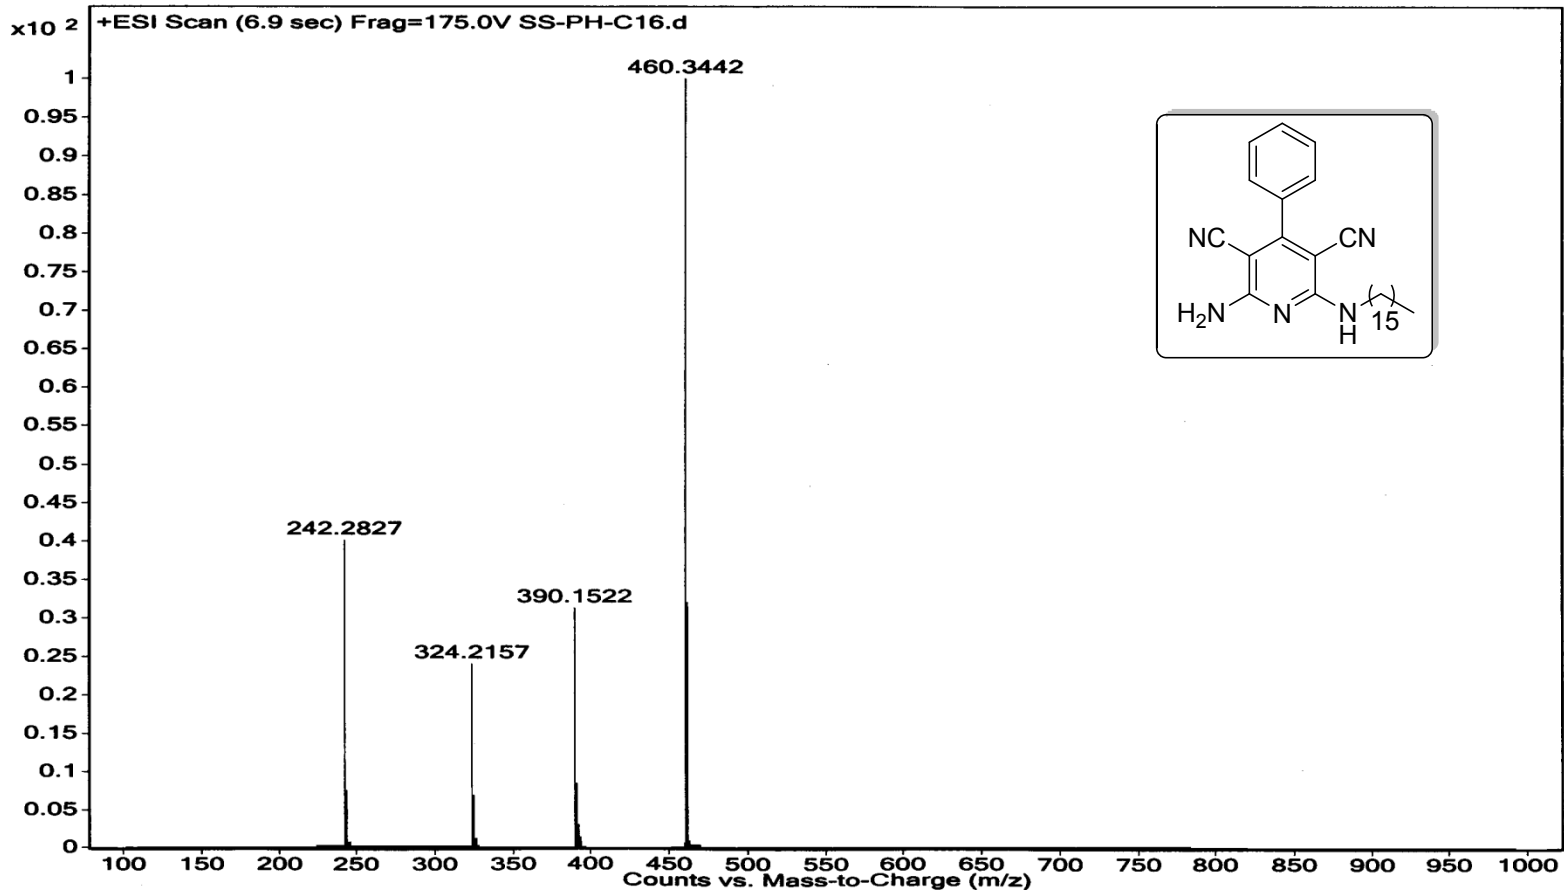

<sup>1</sup>H-NMR spectra of compound 4p

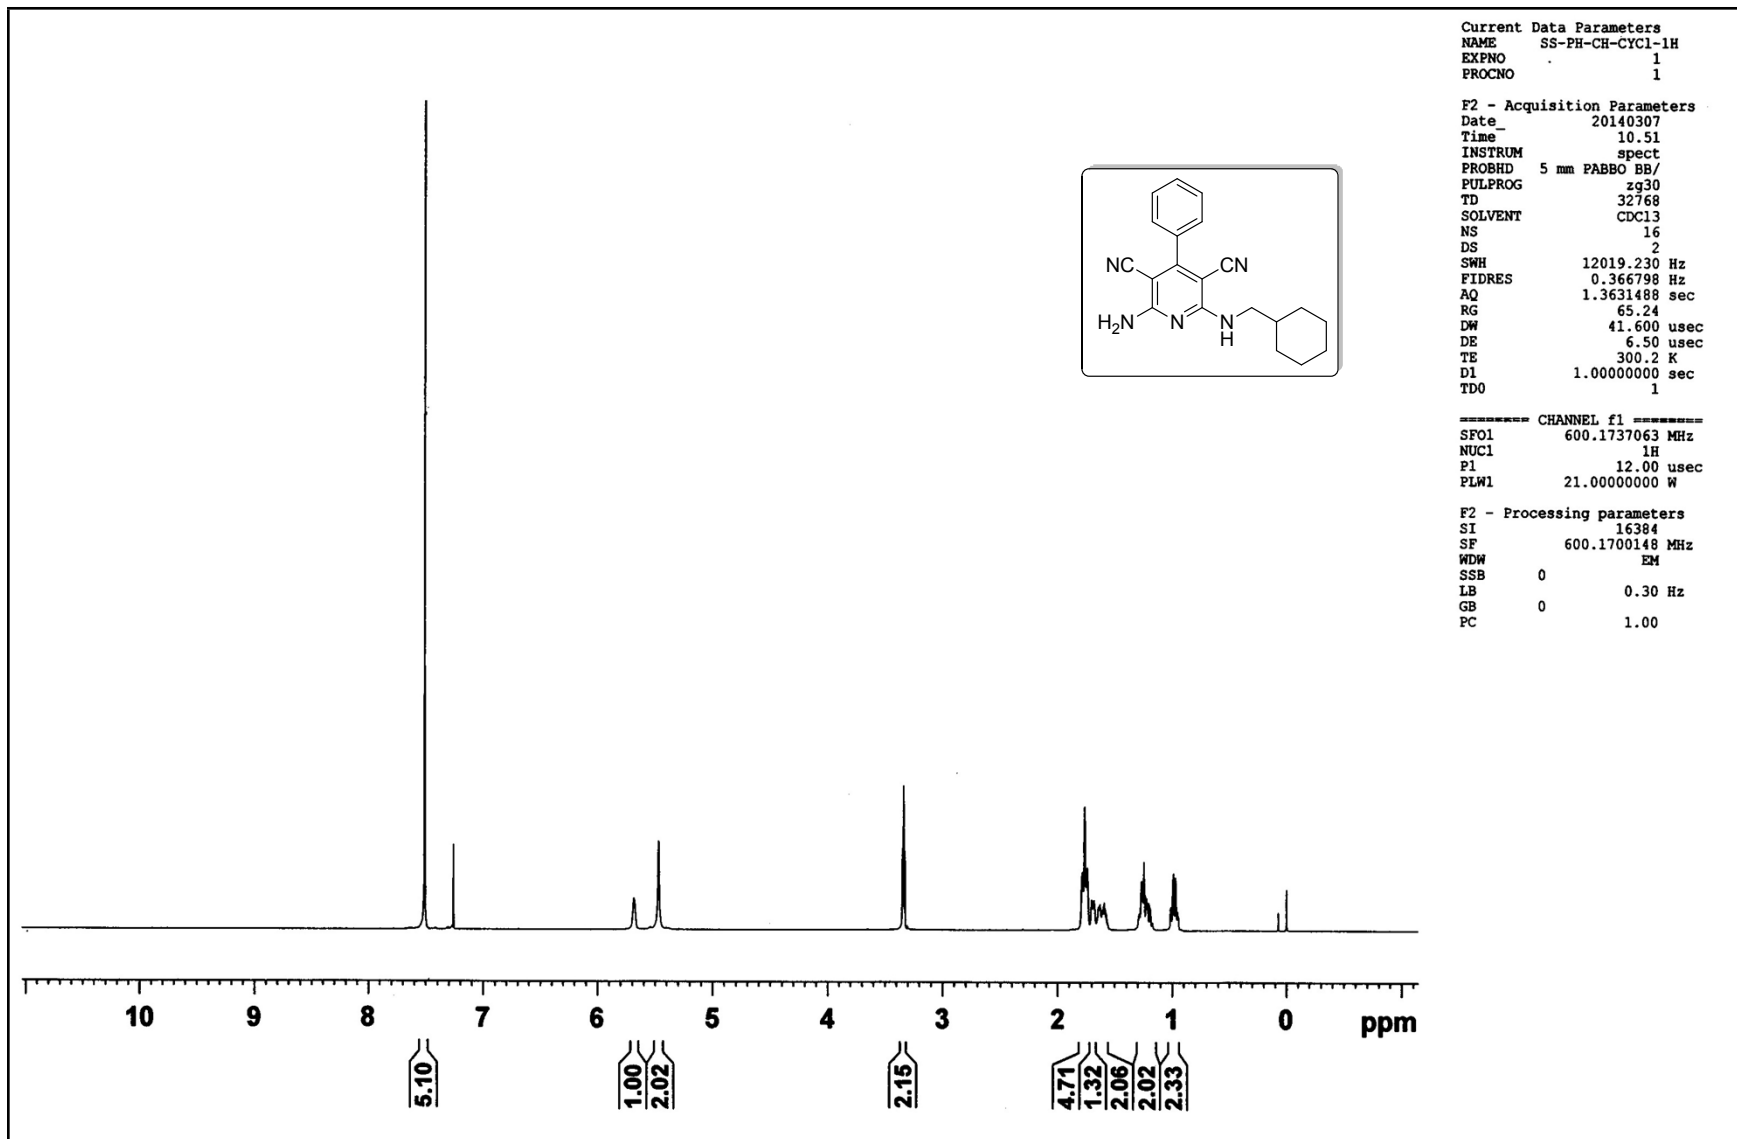

<sup>13</sup>C-spectra of compound 4p

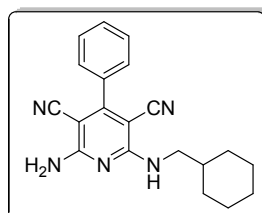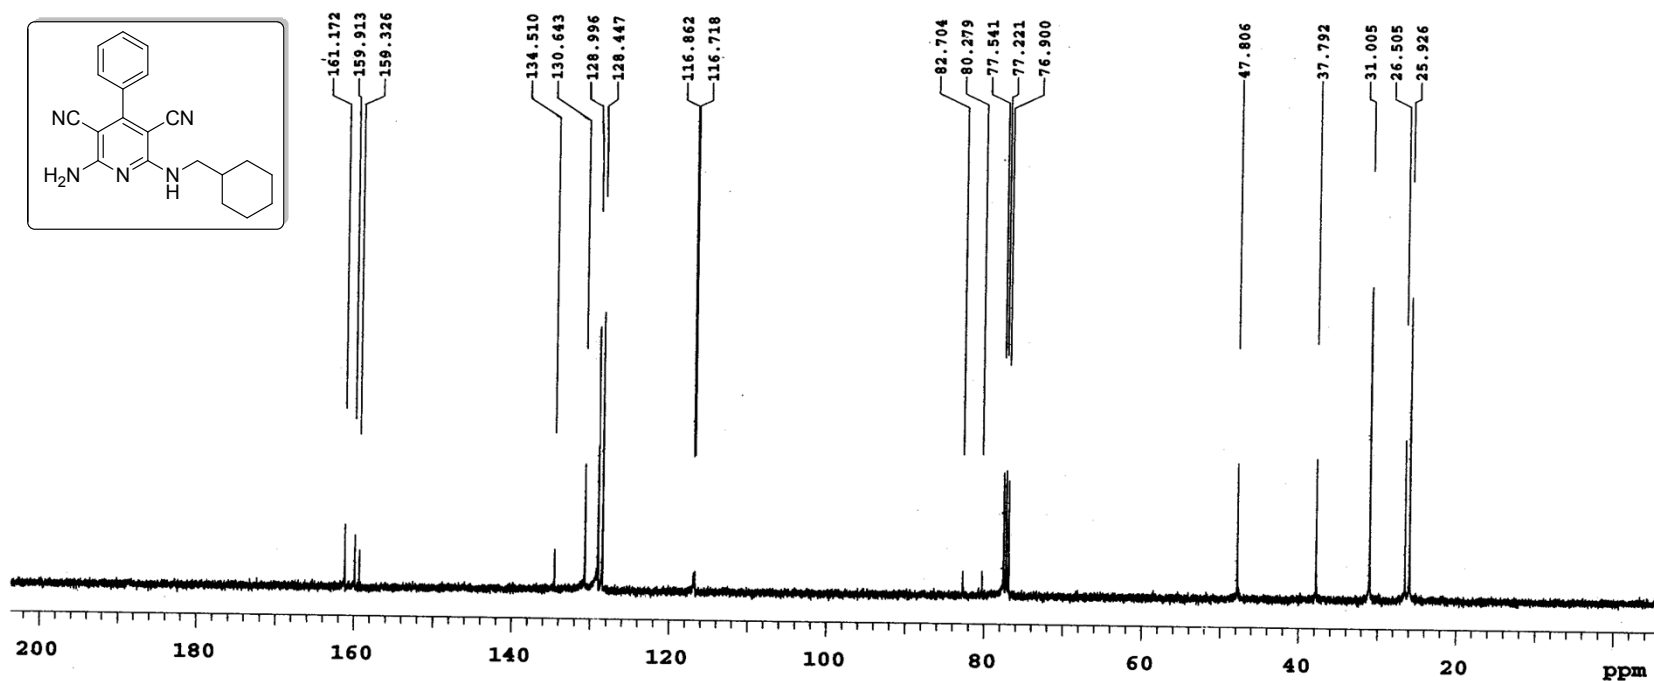

**PULSE SEQUENCE:**

Relax. delay 1.000 sec  
Pulse 45.0 degrees  
Acq. time 1.304 sec  
Width 25125.6 Hz  
1180 repetitions

**OBSERVE** C13, 100.5425887  
**DECOUPLE** H1, 399.8529994  
Power 42 dB  
continuously on  
WALTZ-16 modulated

**DATA PROCESSING**

Line broadening 0.5 Hz  
FT size 65536  
Total time 45 minutes

SS-Ph-CH-Cycl-13C

Solvent: cdc13  
Temp. 25.0 C / 298.1 K  
Operator: chem  
Mercury-400 "IITG-NMR"

# HRMS-spectra of compound 4p

Sample Name  
Inj Vol  
Data Filename

Position  
InjPosition  
ACQ Method

Instrument Name  
SampleType  
Comment

User Name  
IRM Calibration Status  
Acquired Time

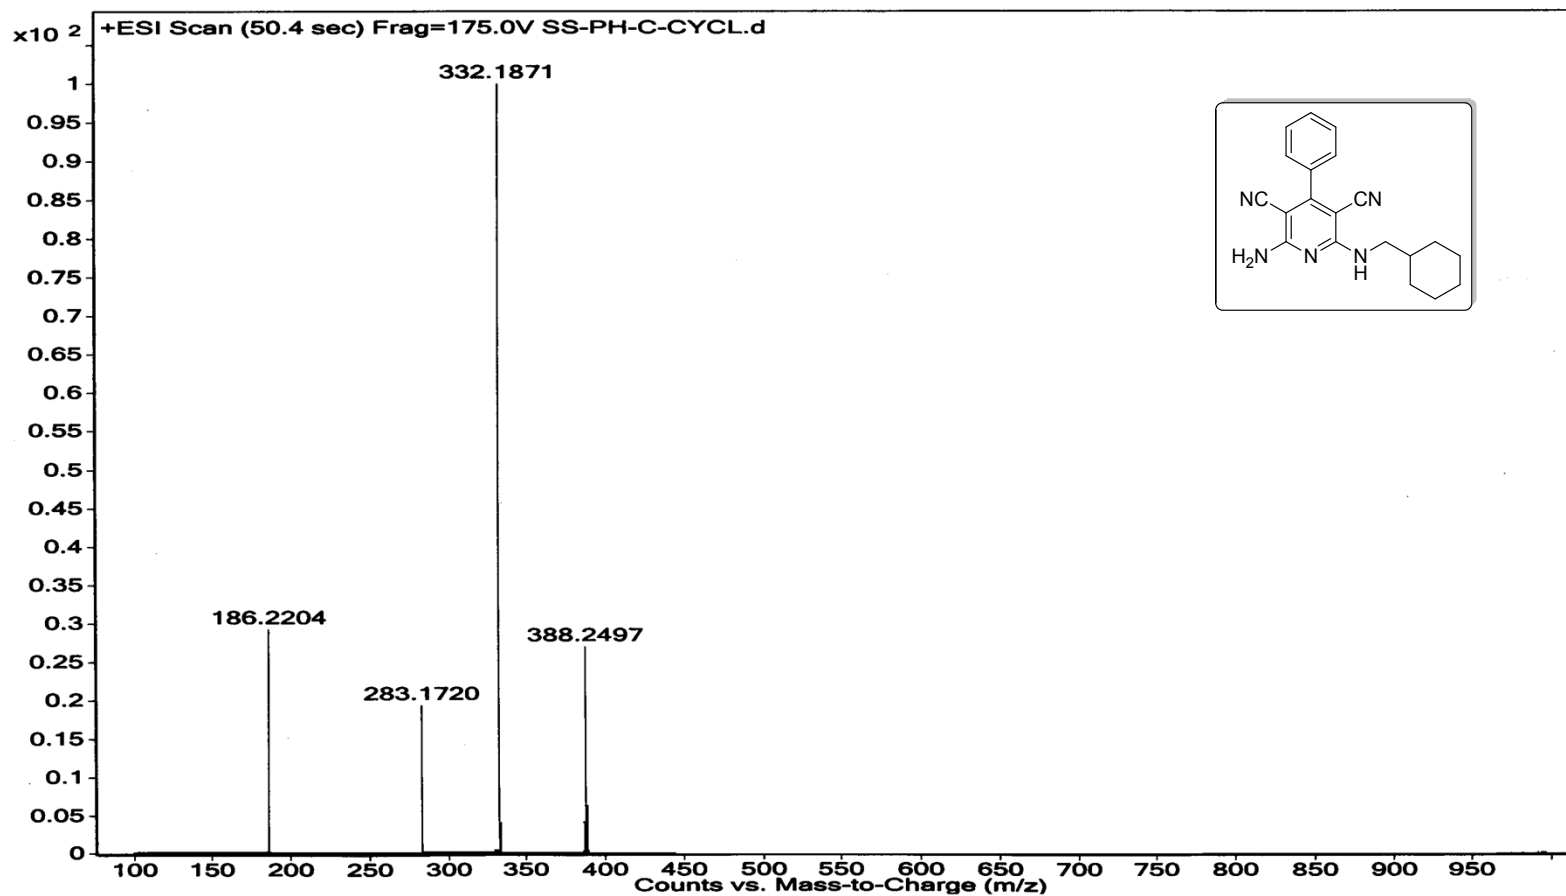



<sup>1</sup>H-NMR spectra of compound 4q

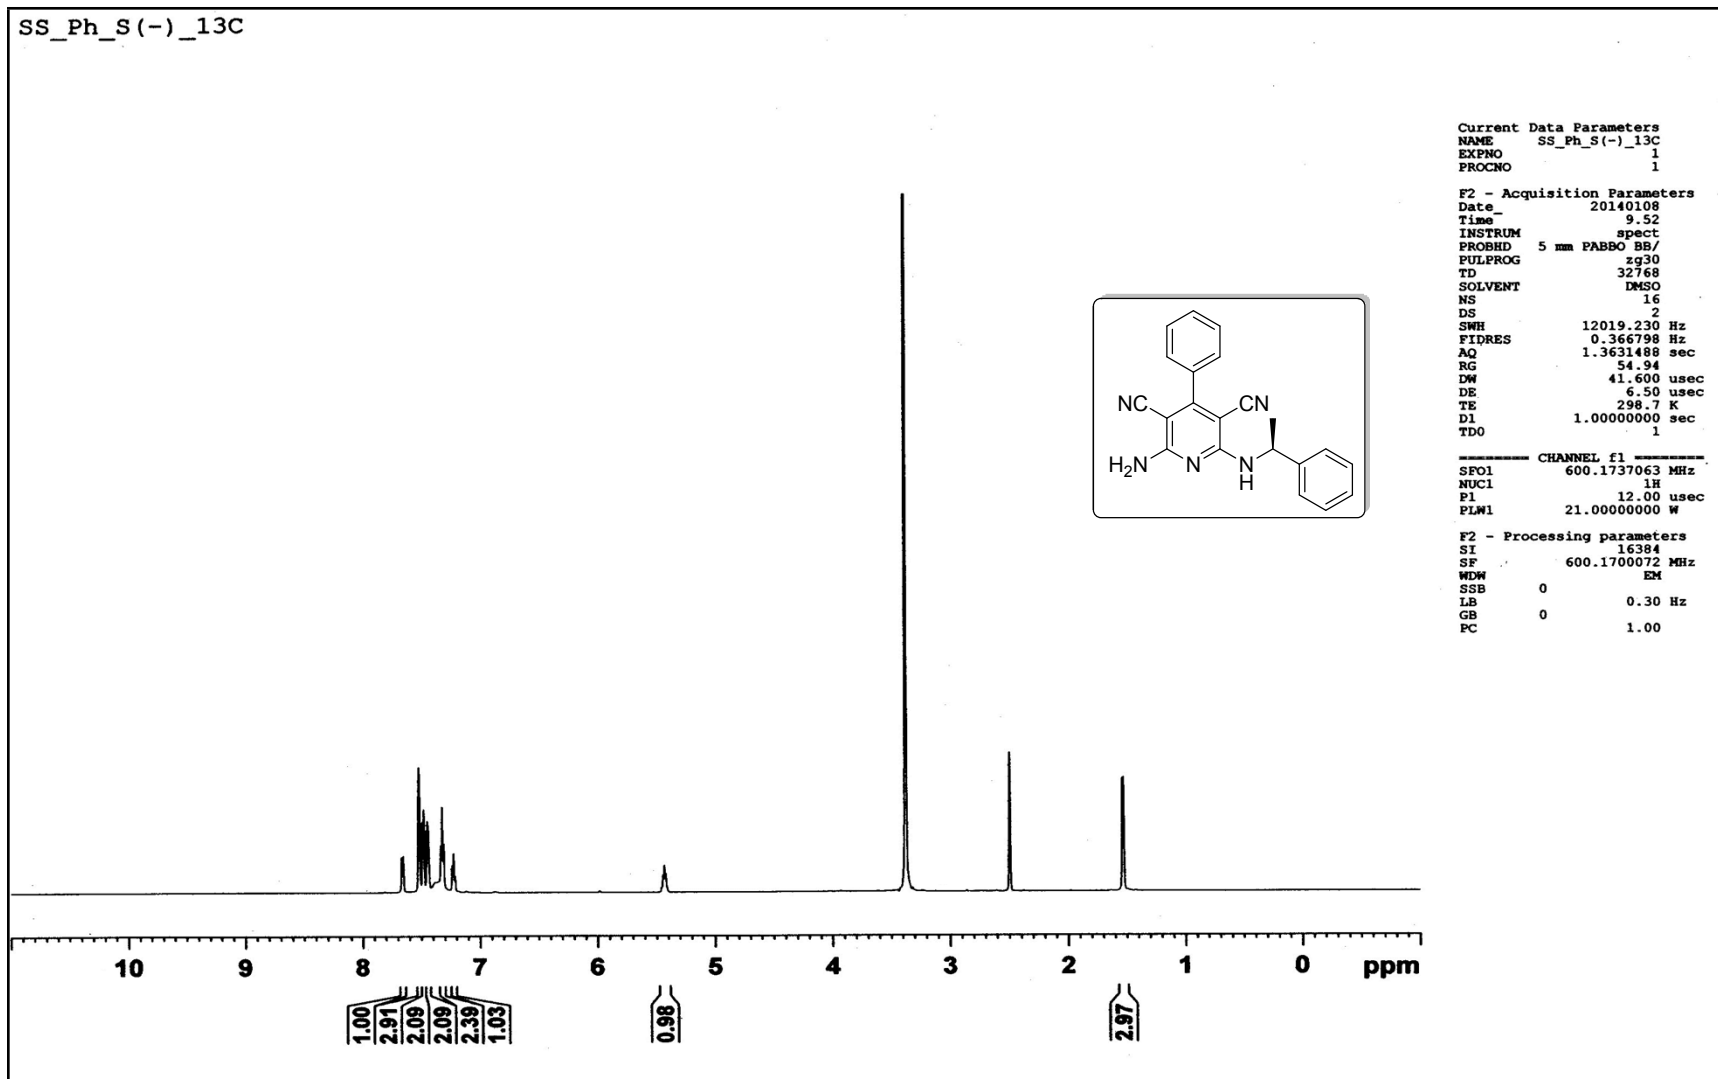

<sup>13</sup>C-NMR spectra of compound 4q

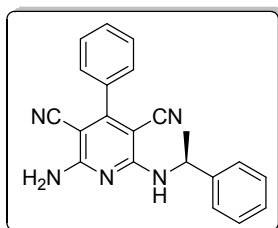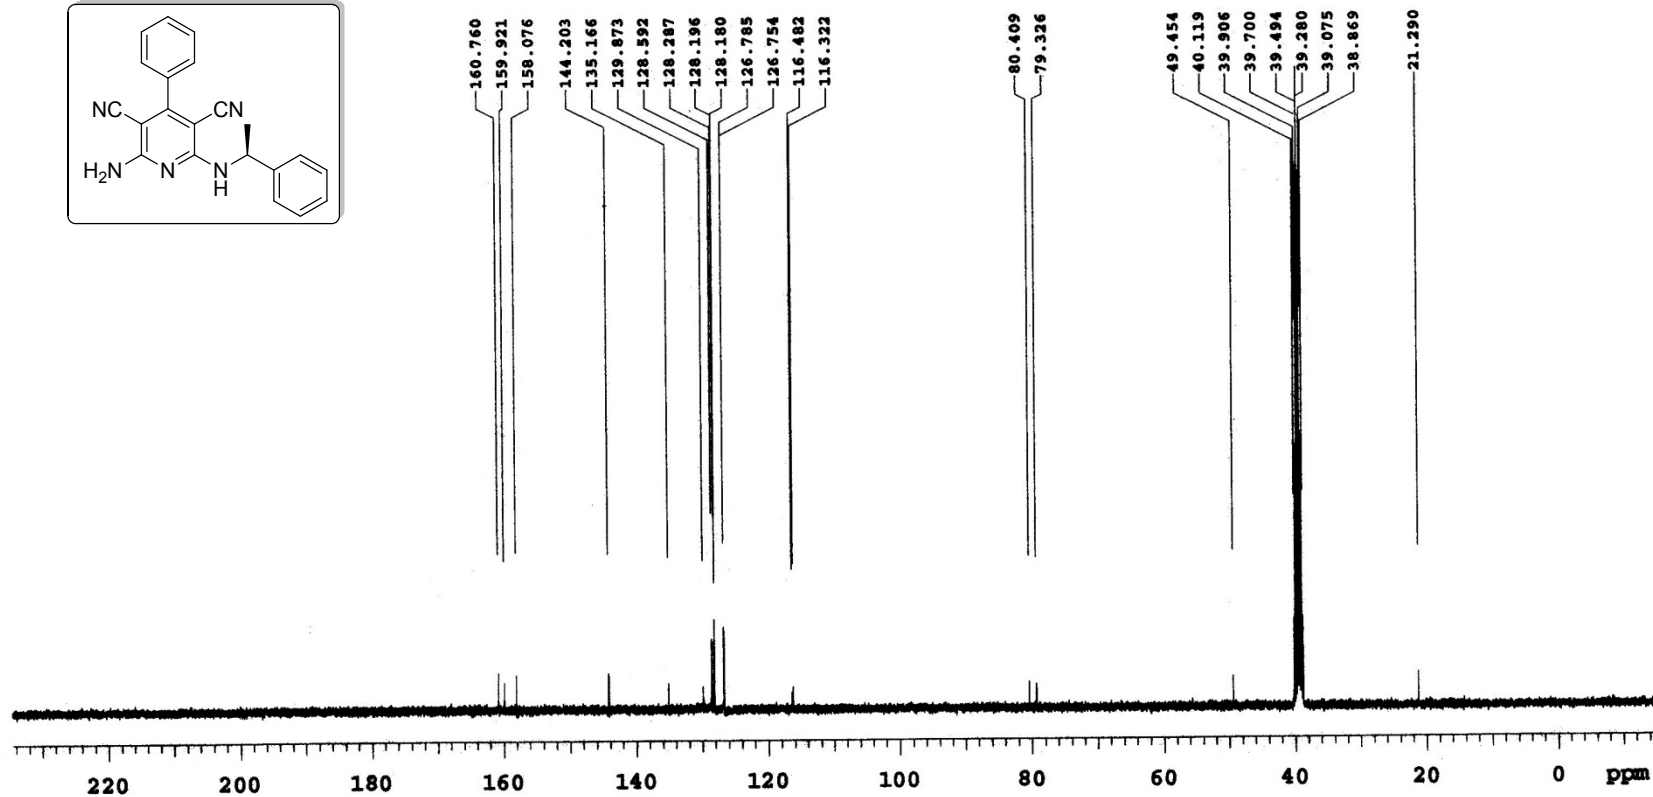

**PULSE SEQUENCE**  
 Relax. delay 1.000 sec  
 Pulse 45.0 degrees  
 Acq. time 1.304 sec  
 Width 25125.6 Hz  
 1775 repetitions

**OBSERVE** C13, 100.5431230  
**DECOUPLE** H1, 399.8548987  
 Power 42 dB  
 continuously on  
**WALTZ-16** modulated

**DATA PROCESSING**  
 Line broadening 0.5 Hz  
 FT size 65536  
 Total time 68 minutes

SS-Ph-S(-)-13C

Solvent: dmso  
 Temp. 25.0 C / 298.1 K  
 Operator: chem  
 Mercury-400 "IITG-NMR"

# HRMS-spectra of compound 4q

| Sample Name   | Position    | Instrument Name | User Name              |
|---------------|-------------|-----------------|------------------------|
| Inj Vol       | InjPosition | SampleType      | IRM Calibration Status |
| Data Filename | ACQ Method  | Comment         | Acquired Time          |

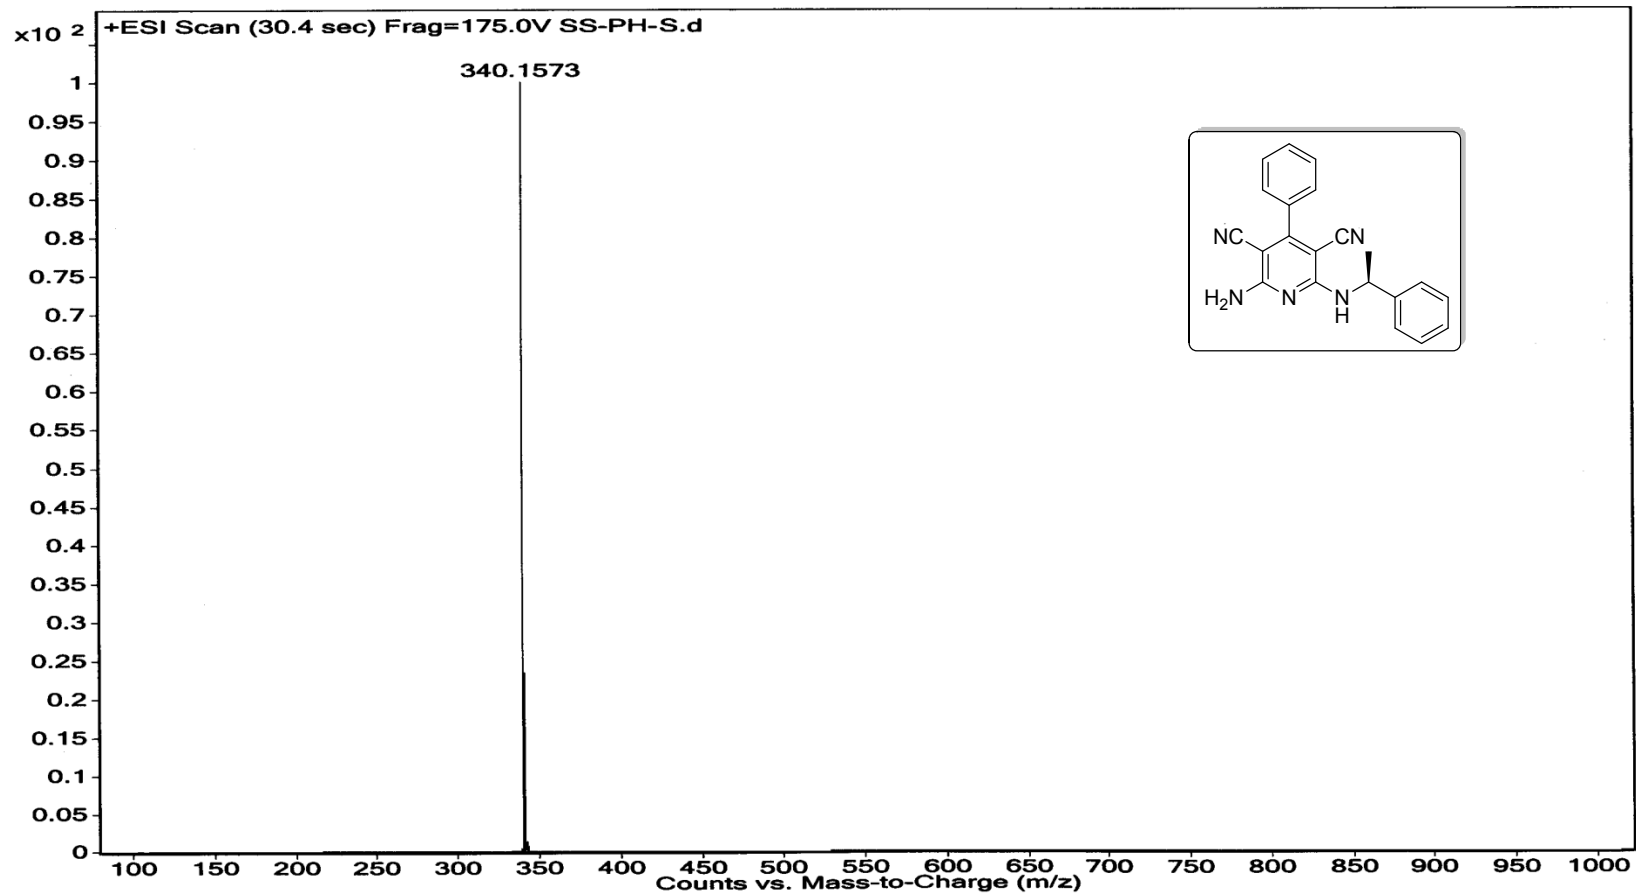

<sup>1</sup>H-NMR spectra of compound 4r

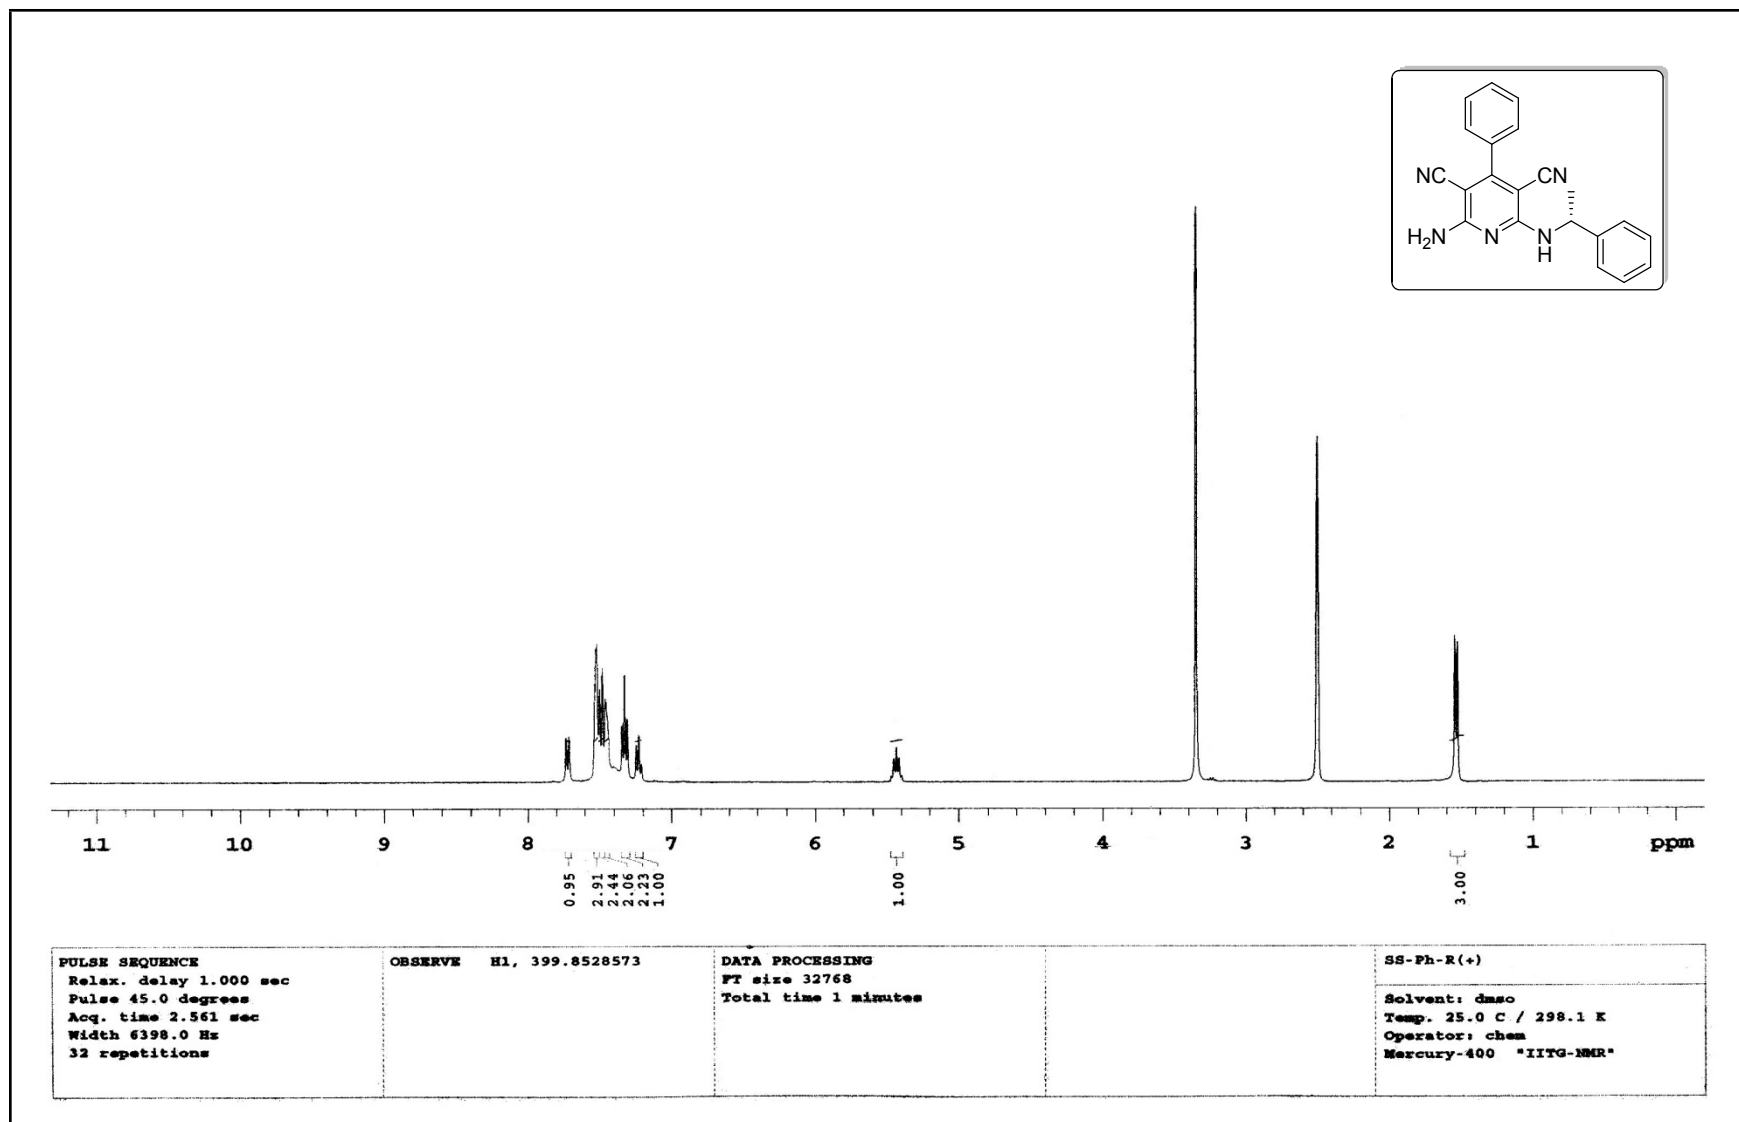

<sup>13</sup>C-NMR spectra of compound 4r

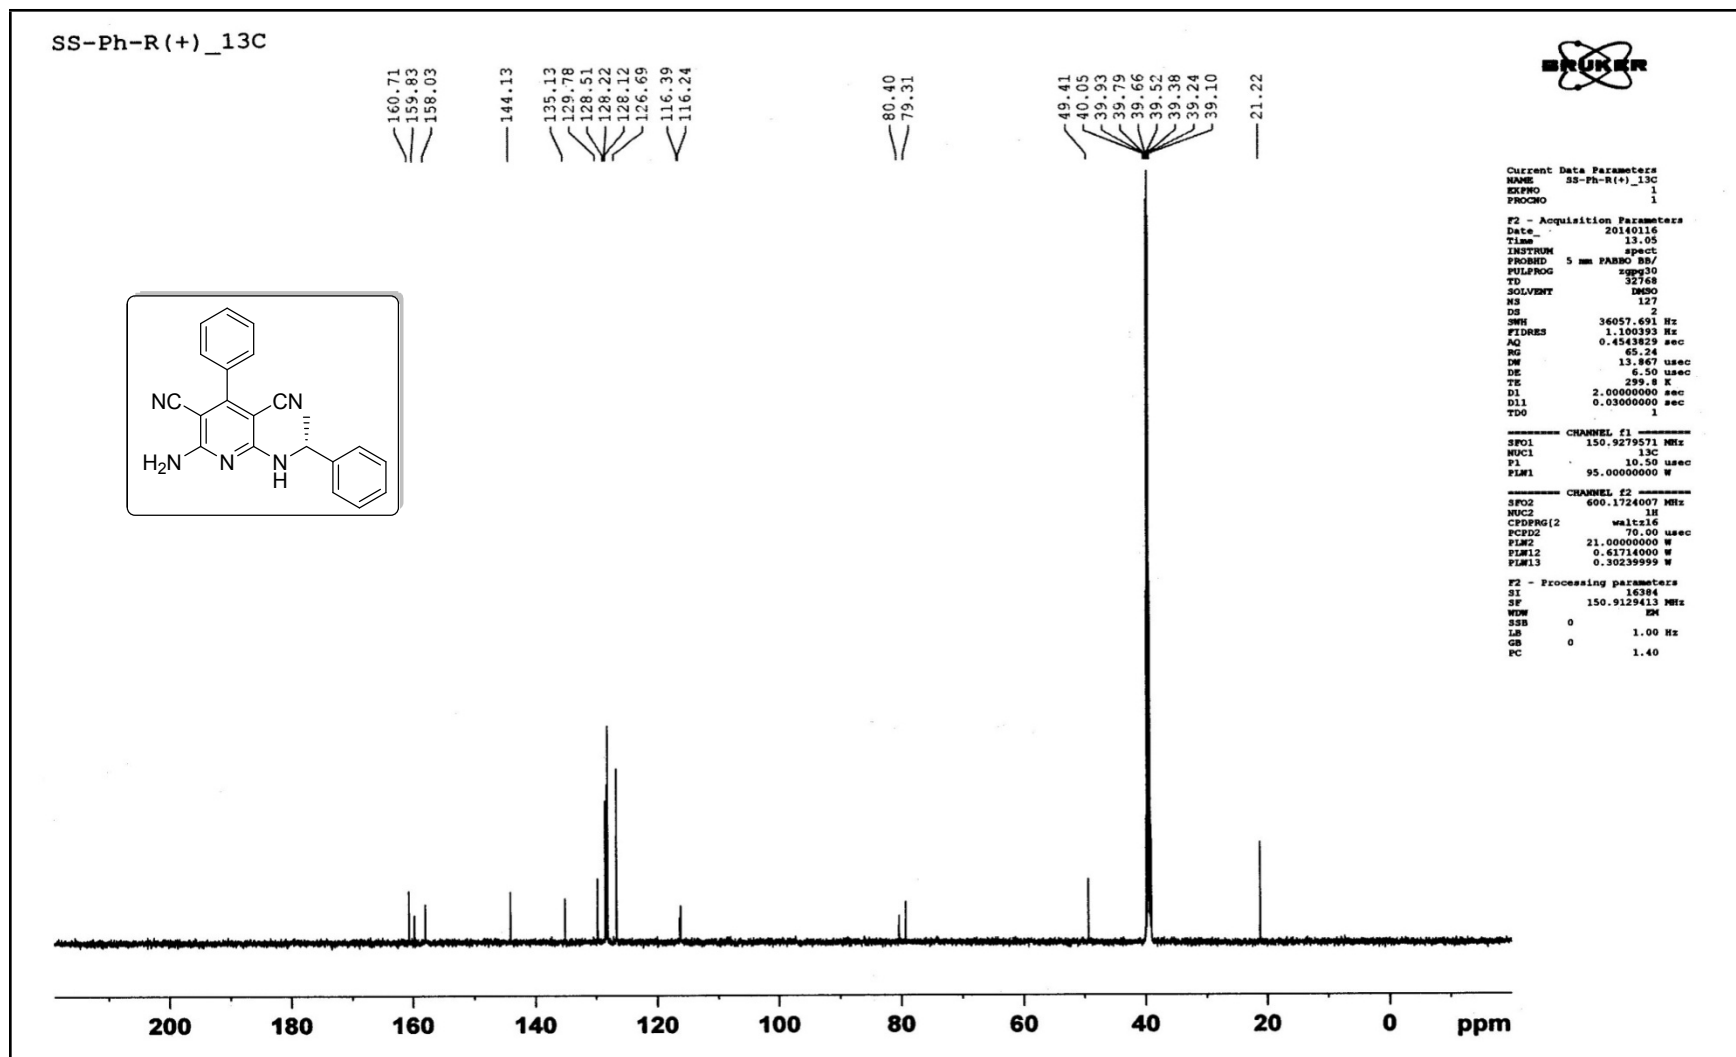

HRMS-spectra of compound 4r

Sample Name SS-PH-R+  
Inj Vol -10  
Data Filename SS-PH-R+.d

Position -1  
InjPosition  
ACQ Method

Instrument Name Instrument 1  
SampleType Sample  
Comment

User Name  
IRM Calibration Status Success  
Acquired Time 4/10/2014 11:37:59 AM

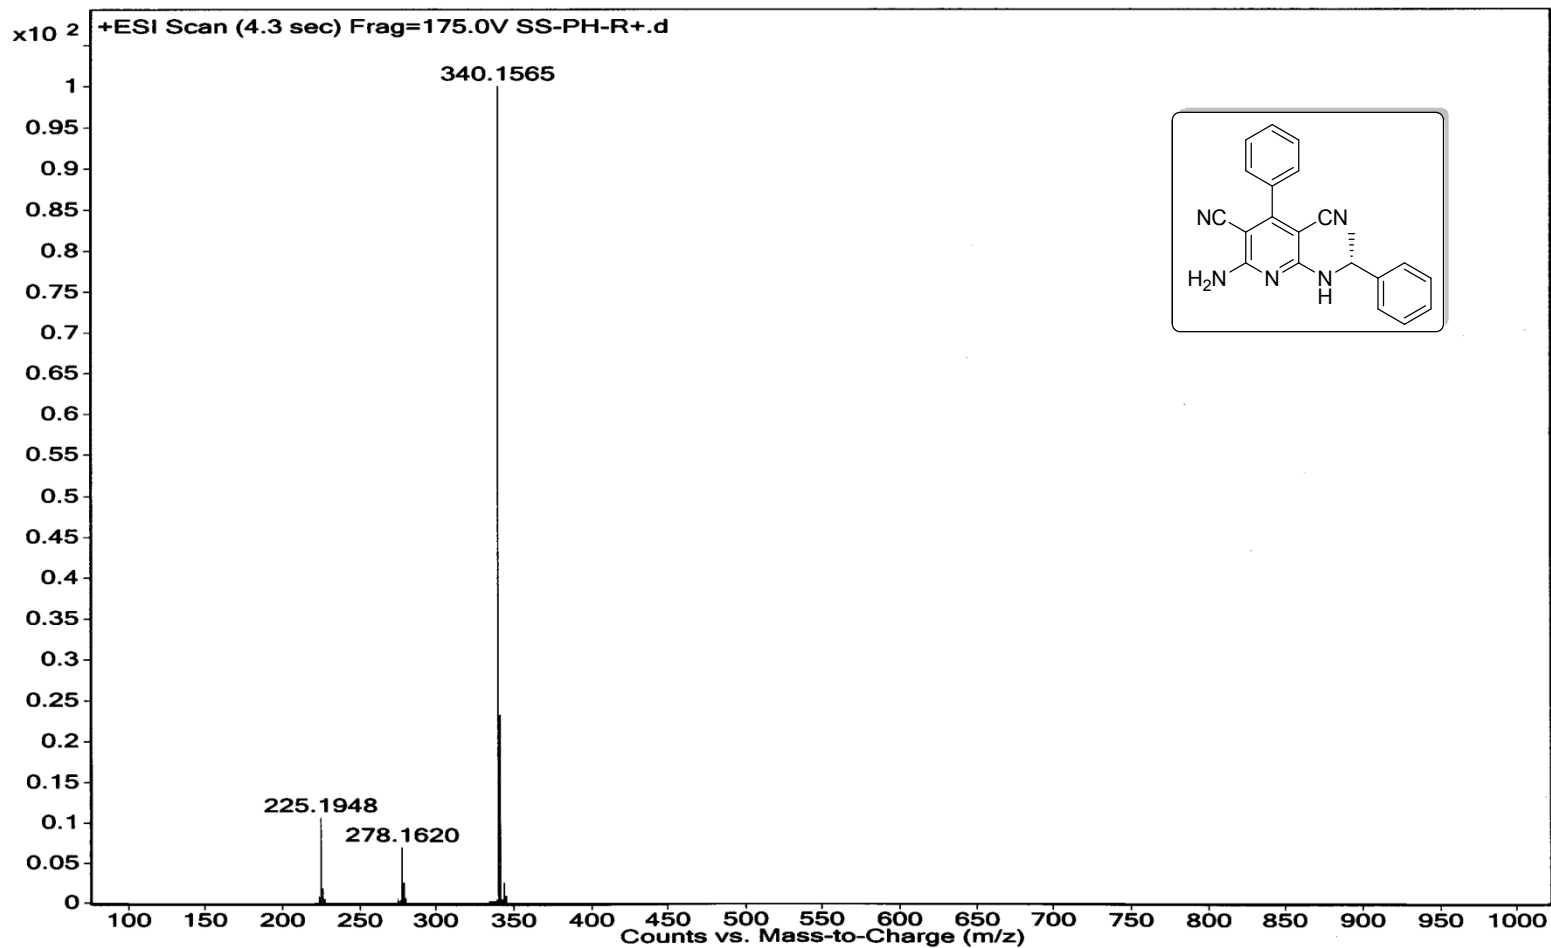

<sup>1</sup>H-NMR spectra of compound 4s

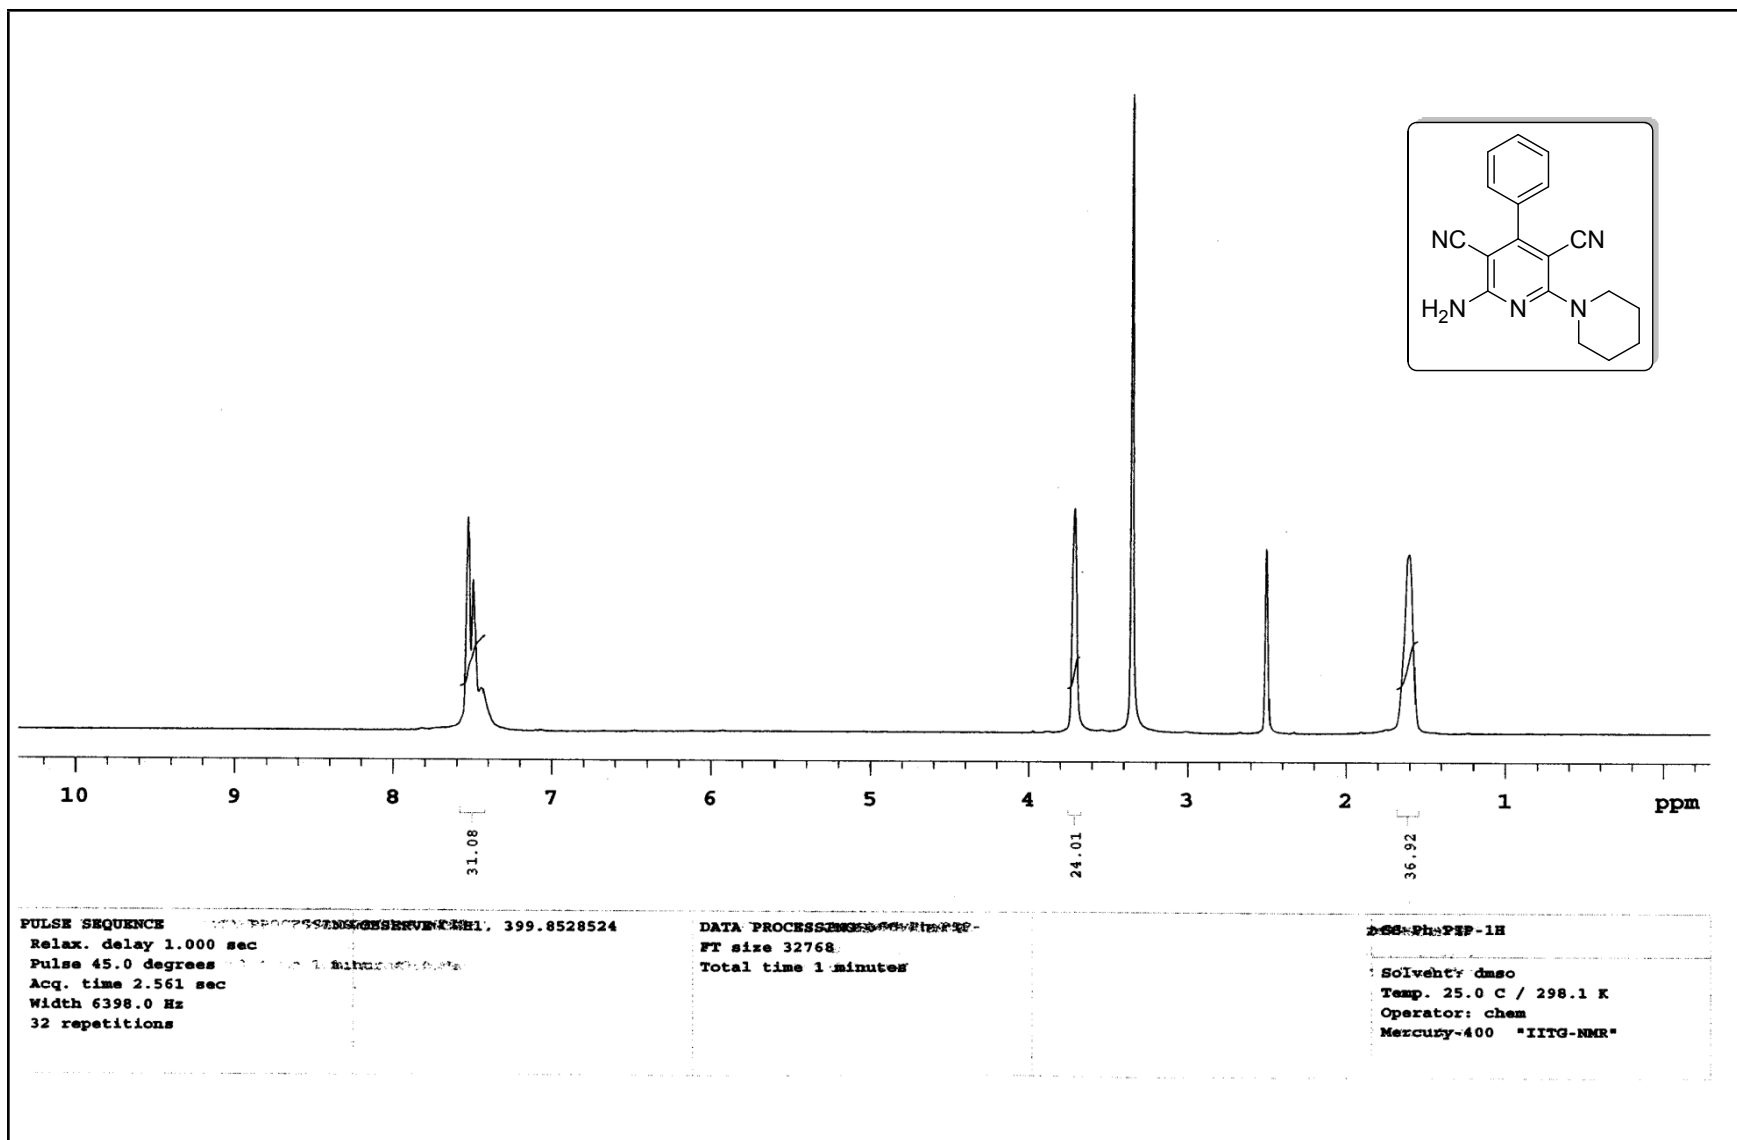

<sup>13</sup>C-NMR spectra of compound 4s

SS\_PH\_PIP\_13C

Current Data Parameters

F2 - Acquisition Parameters  
Date\_ 20140319  
Time\_ 10.32  
INSTRUM spect  
PROBHD 5 mm PABBO BB/  
PULPROG zgpg30  
TD 32768  
SOLVENT DMSO  
NS 220  
DS 2  
SWH 36057.691 Hz  
FIDRES 1.100393 Hz  
AQ 0.4543829 sec  
RG 65.24  
DW 13.867 usec  
DE 6.50 usec  
TE 301.7 K  
D1 2.0000000 sec  
D11 0.0300000 sec  
TDO 1

===== CHANNEL f1 =====  
SFO1 150.9279571 MHz  
NUC1 13C  
P1 10.50 usec  
PLW1 95.0000000 W

===== CHANNEL f2 =====  
SFO2 600.1724007 MHz  
NUC2 1H  
CPDPRG[2] waltz16  
PCPD2 70.00 usec  
PLW2 21.0000000 W  
PLW12 0.6171400 W  
PLW13 0.30239999 W

F2 - Processing parameters  
SI 16384  
SF 150.9129420 MHz  
WDW EM  
SSB 0  
LB 1.00 Hz  
GB 0  
PC 1.40

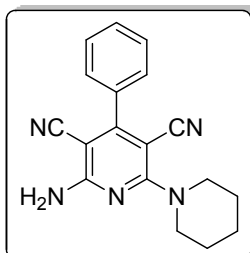

161.76  
160.66  
159.70

135.35  
129.91  
128.61  
128.50

117.72  
116.16

81.50  
80.85

48.41  
39.93  
39.79  
39.65  
39.51  
39.37  
39.23  
39.09

25.54  
23.87

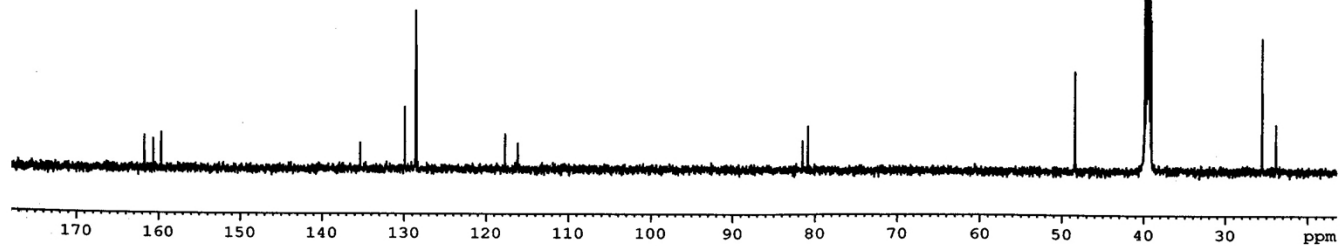



# HRMS-spectra of compound 4s

|                      |             |                    |    |                        |              |                               |                       |
|----------------------|-------------|--------------------|----|------------------------|--------------|-------------------------------|-----------------------|
| <b>Sample Name</b>   | SS-PH-PIP   | <b>Position</b>    | -1 | <b>Instrument Name</b> | Instrument 1 | <b>User Name</b>              |                       |
| <b>Inj Vol</b>       | -10         | <b>InjPosition</b> |    | <b>SampleType</b>      | Sample       | <b>IRM Calibration Status</b> | Success               |
| <b>Data Filename</b> | SS-PH-PIP.d | <b>ACQ Method</b>  |    | <b>Comment</b>         |              | <b>Acquired Time</b>          | 3/24/2014 12:08:31 PM |

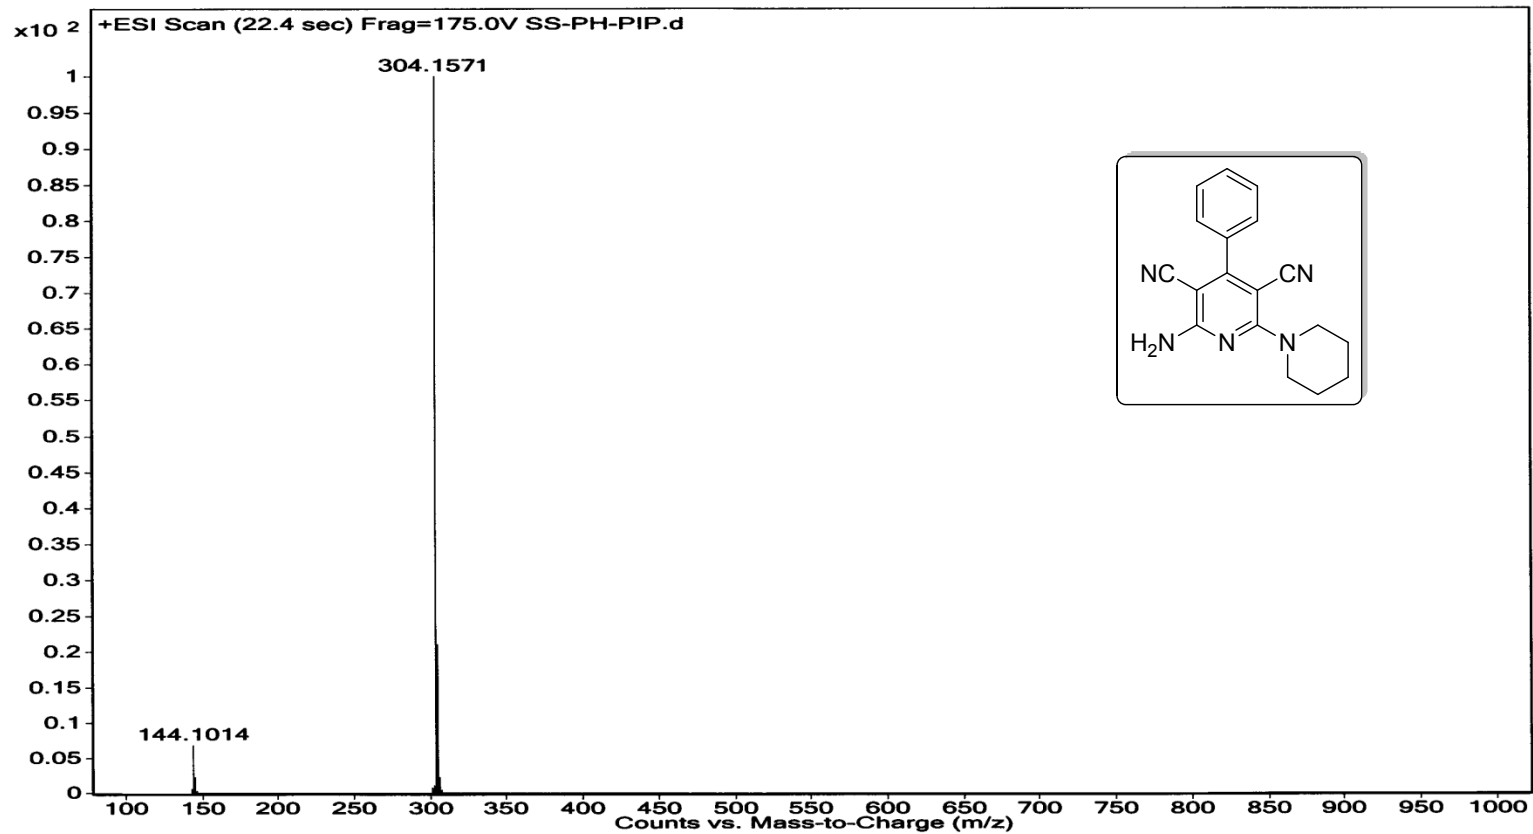

<sup>1</sup>H-NMR spectra of compound 4t

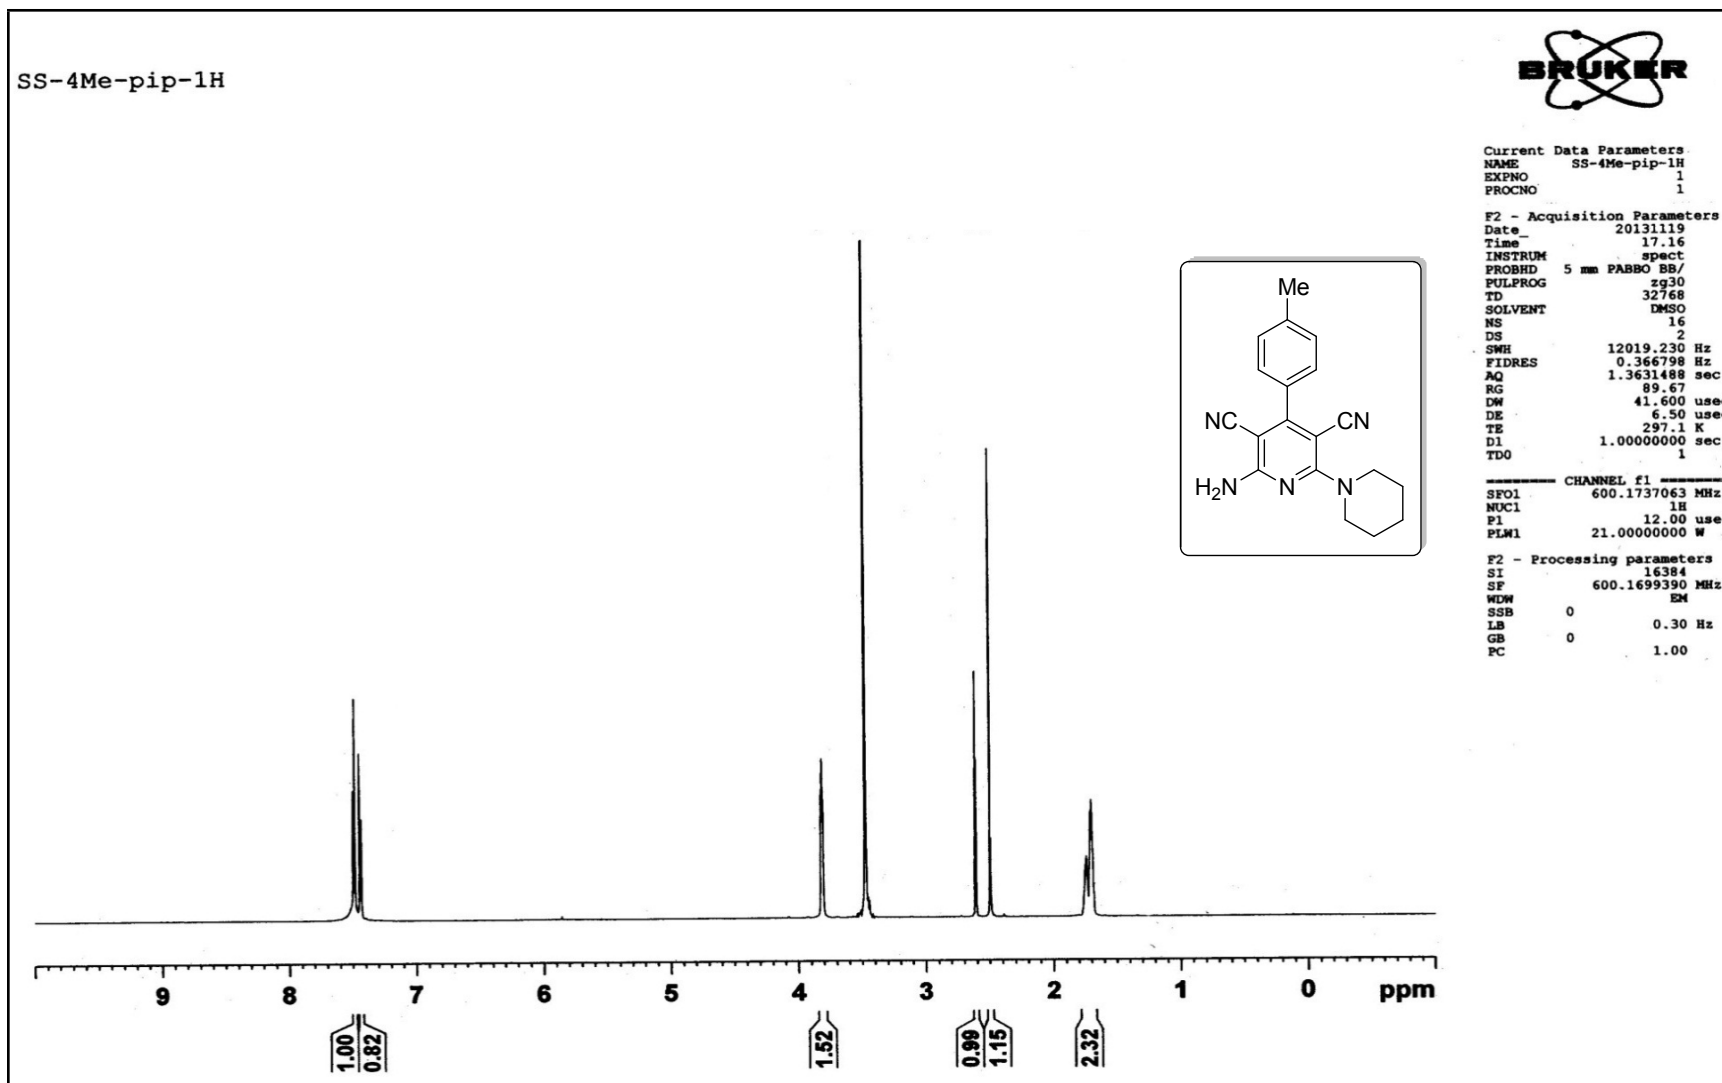

<sup>13</sup>C-NMR spectra of compound 4t

SS-4Me-pip-13C

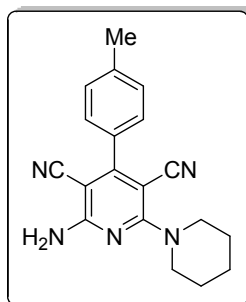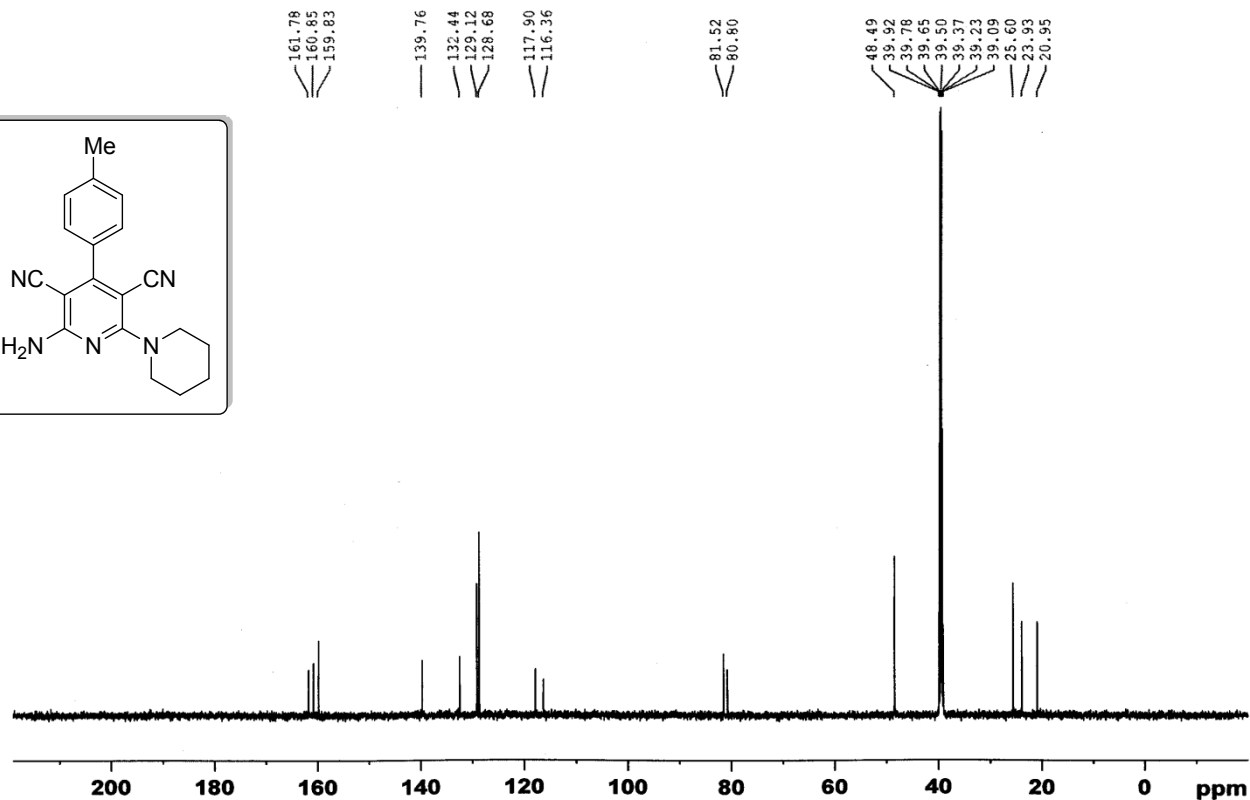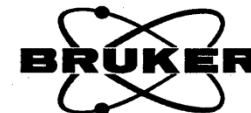

Current Data Parameters  
 NAME SS-4Me-pip-13C  
 EXPNO 1  
 PROCNO 1

F2 - Acquisition Parameters  
 Date\_ 20131125  
 Time 8.59  
 INSTRUM spect  
 PROBHD 5 mm PABCO BB/  
 PULPROG zgpg30  
 TD 32768  
 SOLVENT DMSO  
 NS 52  
 DS 2  
 SWH 36057.691 Hz  
 FIDRES 1.100393 Hz  
 AQ 0.4543829 sec  
 RG 65.24  
 DW 13.867 usec  
 DE 6.50 usec  
 TE 297.9 K  
 D1 2.0000000 sec  
 D11 0.0300000 sec  
 TD0 1

----- CHANNEL f1 -----  
 SFO1 150.9279571 MHz  
 NUC1 13C  
 P1 10.50 usec  
 PLW1 95.0000000 W

----- CHANNEL f2 -----  
 SFO2 600.1724007 MHz  
 NUC2 1H  
 CPDPRG[2] waltz16  
 PCPD2 70.00 usec  
 PLW2 21.0000000 W  
 PLW12 0.61714000 W  
 PLW13 0.30239999 W

F2 - Processing parameters  
 SI 16384  
 SF 150.9129342 MHz  
 WDW EM  
 SSB 0  
 LB 1.00 Hz  
 GB 0  
 PC 1.40

# HRMS-spectra of compound 4t

Sample Name  
Inj Vol  
Data Filename

Position  
InjPosition  
ACQ Method

Instrument Name  
SampleType  
Comment

User Name  
IRM Calibration Status  
Acquired Time

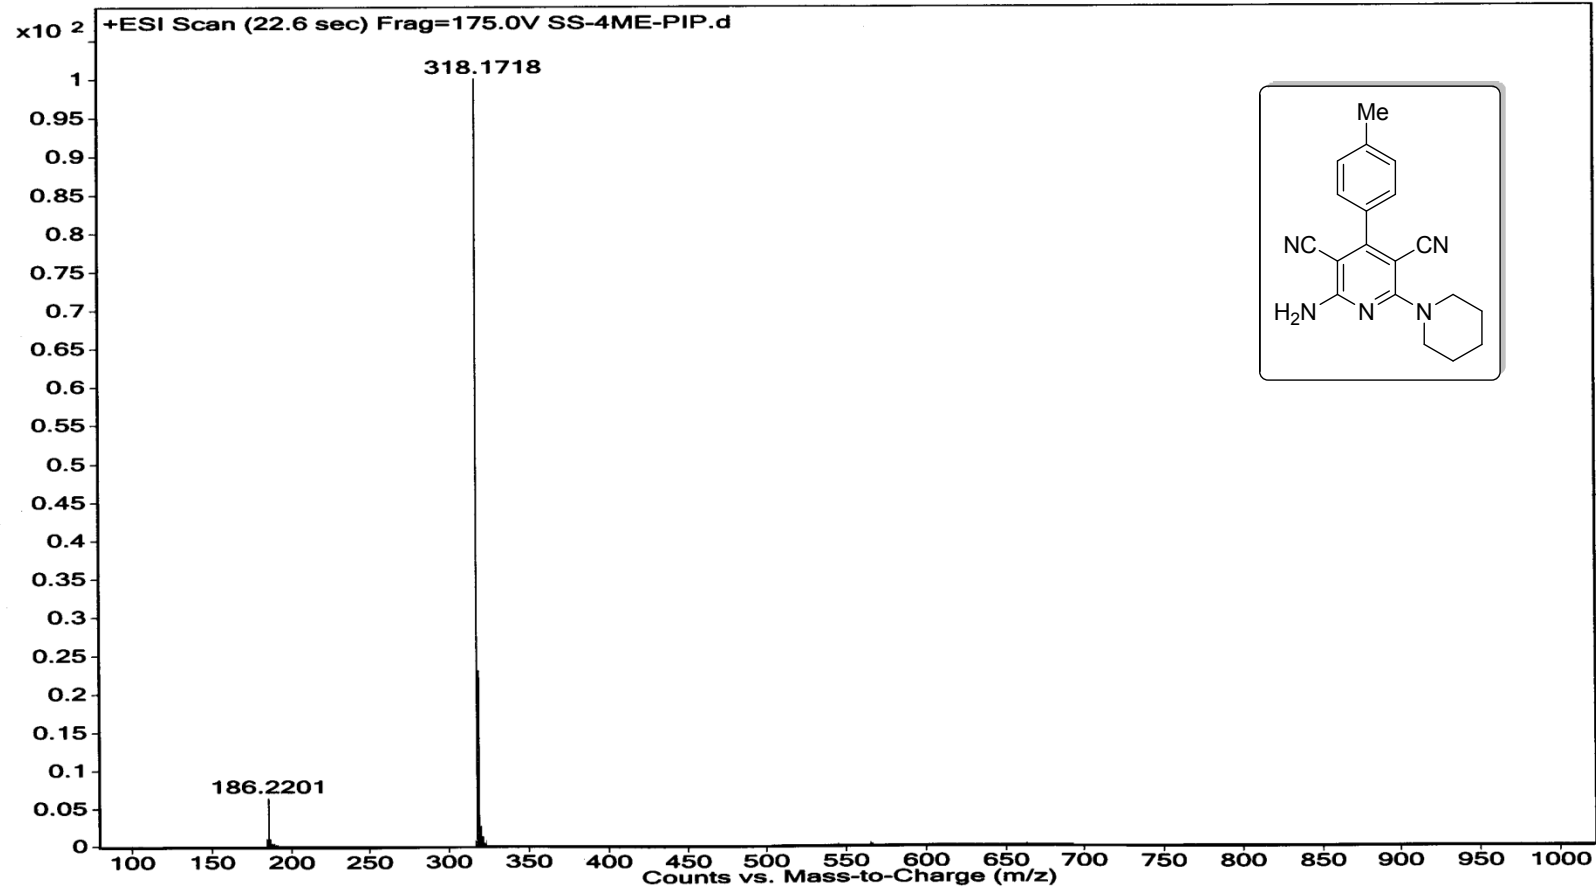

<sup>1</sup>H-NMR spectra of compound **4u**

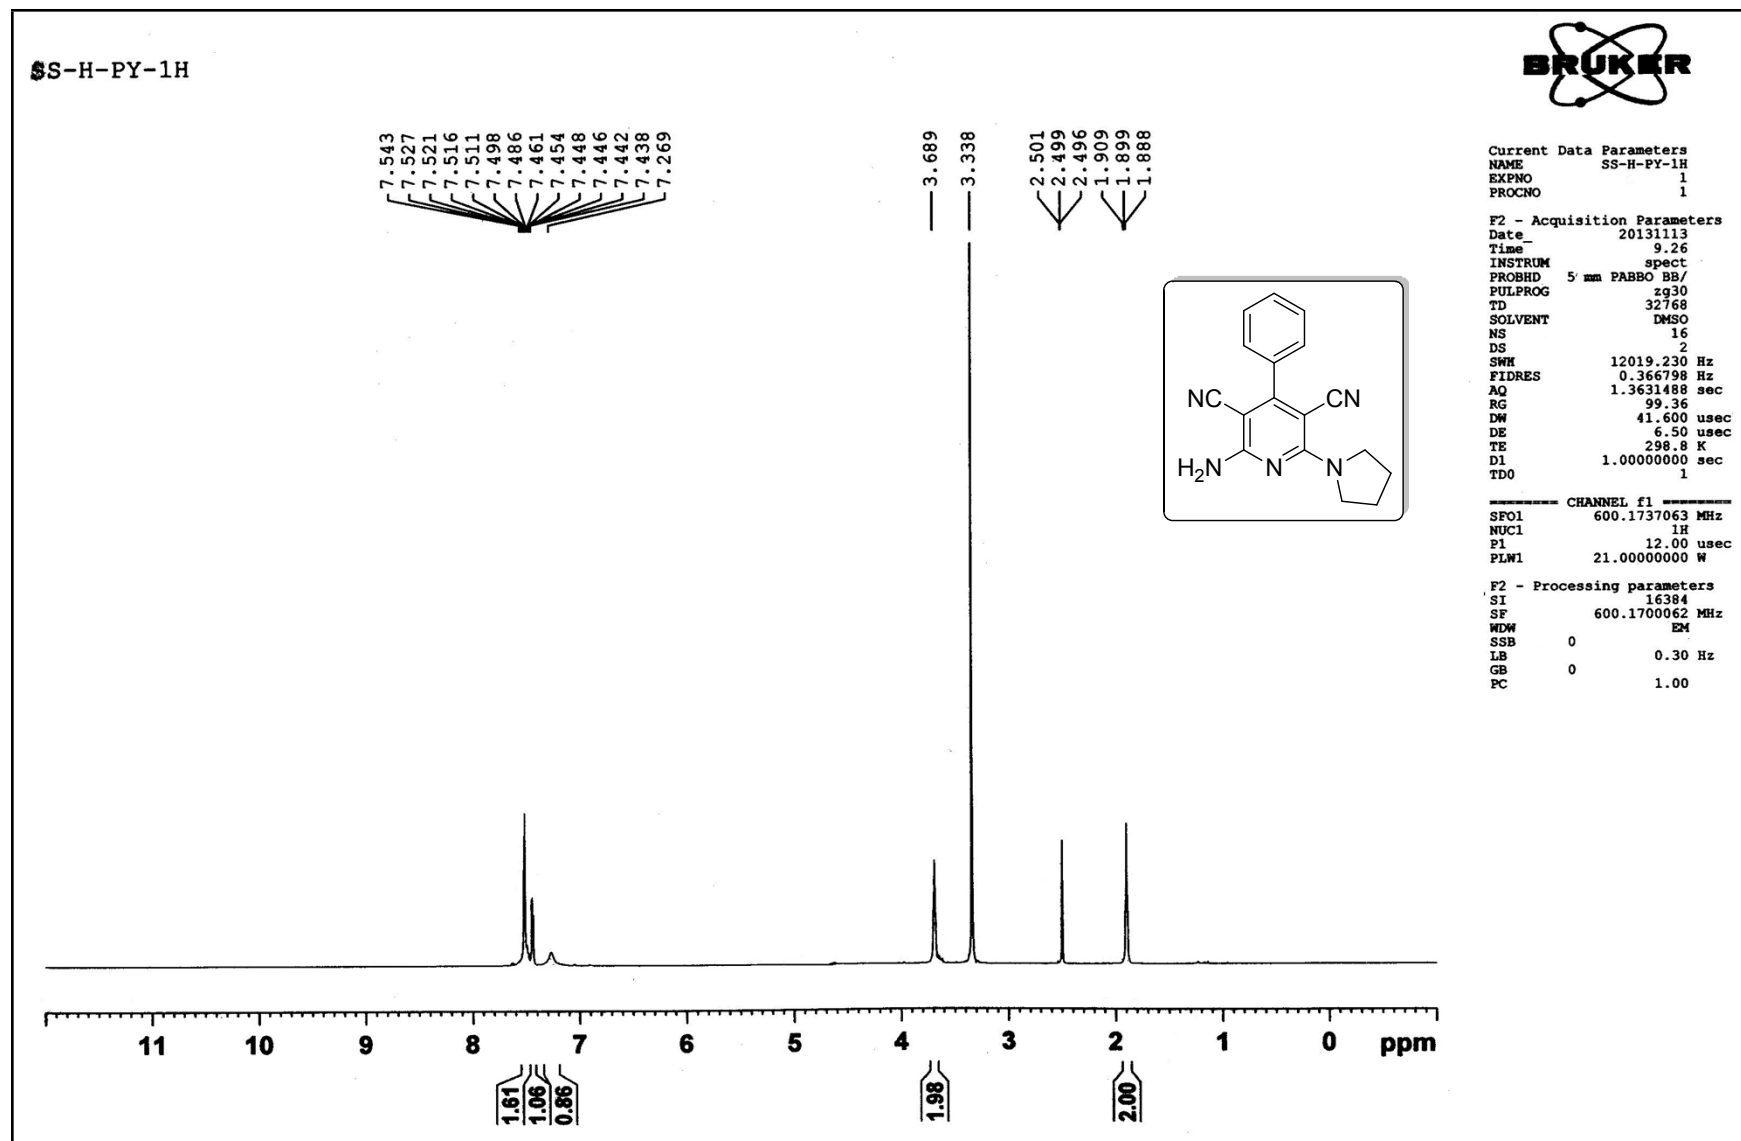

<sup>13</sup>C-NMR spectra of compound **4u**

SS-H-Py-13C

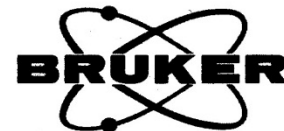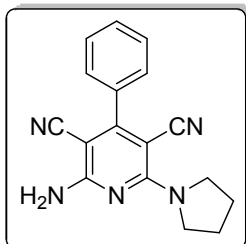

161.59  
159.59  
157.19

135.57  
129.74  
128.50  
128.45  
118.18  
116.47

80.17  
80.01

49.15  
39.91  
39.78  
39.64  
39.50  
39.36  
39.22  
39.08  
24.92

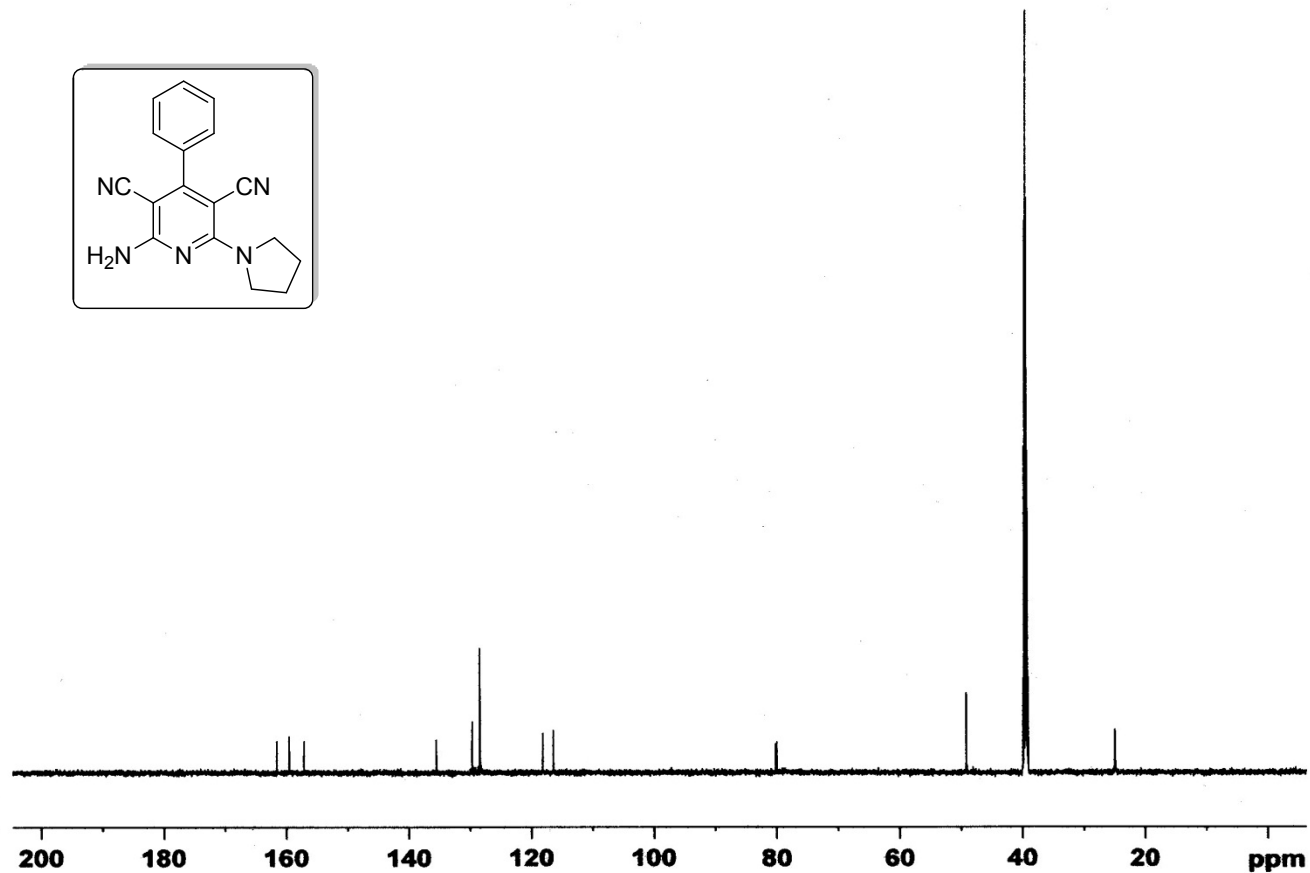

Current Data Parameters  
NAME SS-H-Py-13C  
EXPNO 1  
PROCNO 1

F2 - Acquisition Parameters  
Date\_ 20131118  
Time\_ 10.21  
INSTRUM spect  
PROBHD 5 mm PABBO BB/  
PULPROG zgpg30  
TD 32768  
SOLVENT DMSO  
NS 139  
DS 2  
SWH 36057.691 Hz  
FIDRES 1.100393 Hz  
AQ 0.4543829 sec  
RG 65.24  
DW 13.867 usec  
DE 6.50 usec  
TE 298.3 K  
D1 2.00000000 sec  
D11 0.03000000 sec  
TD0 1

===== CHANNEL f1 =====  
SFO1 150.9279571 MHz  
NUC1 13C  
P1 10.50 usec  
PLW1 95.00000000 W

===== CHANNEL f2 =====  
SFO2 600.1724007 MHz  
NUC2 1H  
CPDPRG[2] waltz16  
PCPD2 70.00 usec  
PLW2 21.00000000 W  
PLW12 0.61714000 W  
PLW13 0.30239999 W

F2 - Processing parameters  
SI 16384  
SF 150.9129343 MHz  
WDW EM  
SSB 0  
LB 1.00 Hz  
GB 0  
PC 1.40

HRMS-spectra of compound 4u

|                      |             |                    |             |                        |                                   |                               |             |
|----------------------|-------------|--------------------|-------------|------------------------|-----------------------------------|-------------------------------|-------------|
| <b>Sample Name</b>   | Unavailable | <b>Position</b>    | Unavailable | <b>Instrument Name</b> | Unavailable                       | <b>User Name</b>              | Unavailable |
| <b>Inj Vol</b>       | Unavailable | <b>InjPosition</b> | Unavailable | <b>SampleType</b>      | Unavailable                       | <b>IRM Calibration Status</b> | Success     |
| <b>Data Filename</b> | SS-PH-PY.d  | <b>ACQ Method</b>  |             | <b>Comment</b>         | Sample information is unavailable | <b>Acquired Time</b>          | Unavailable |

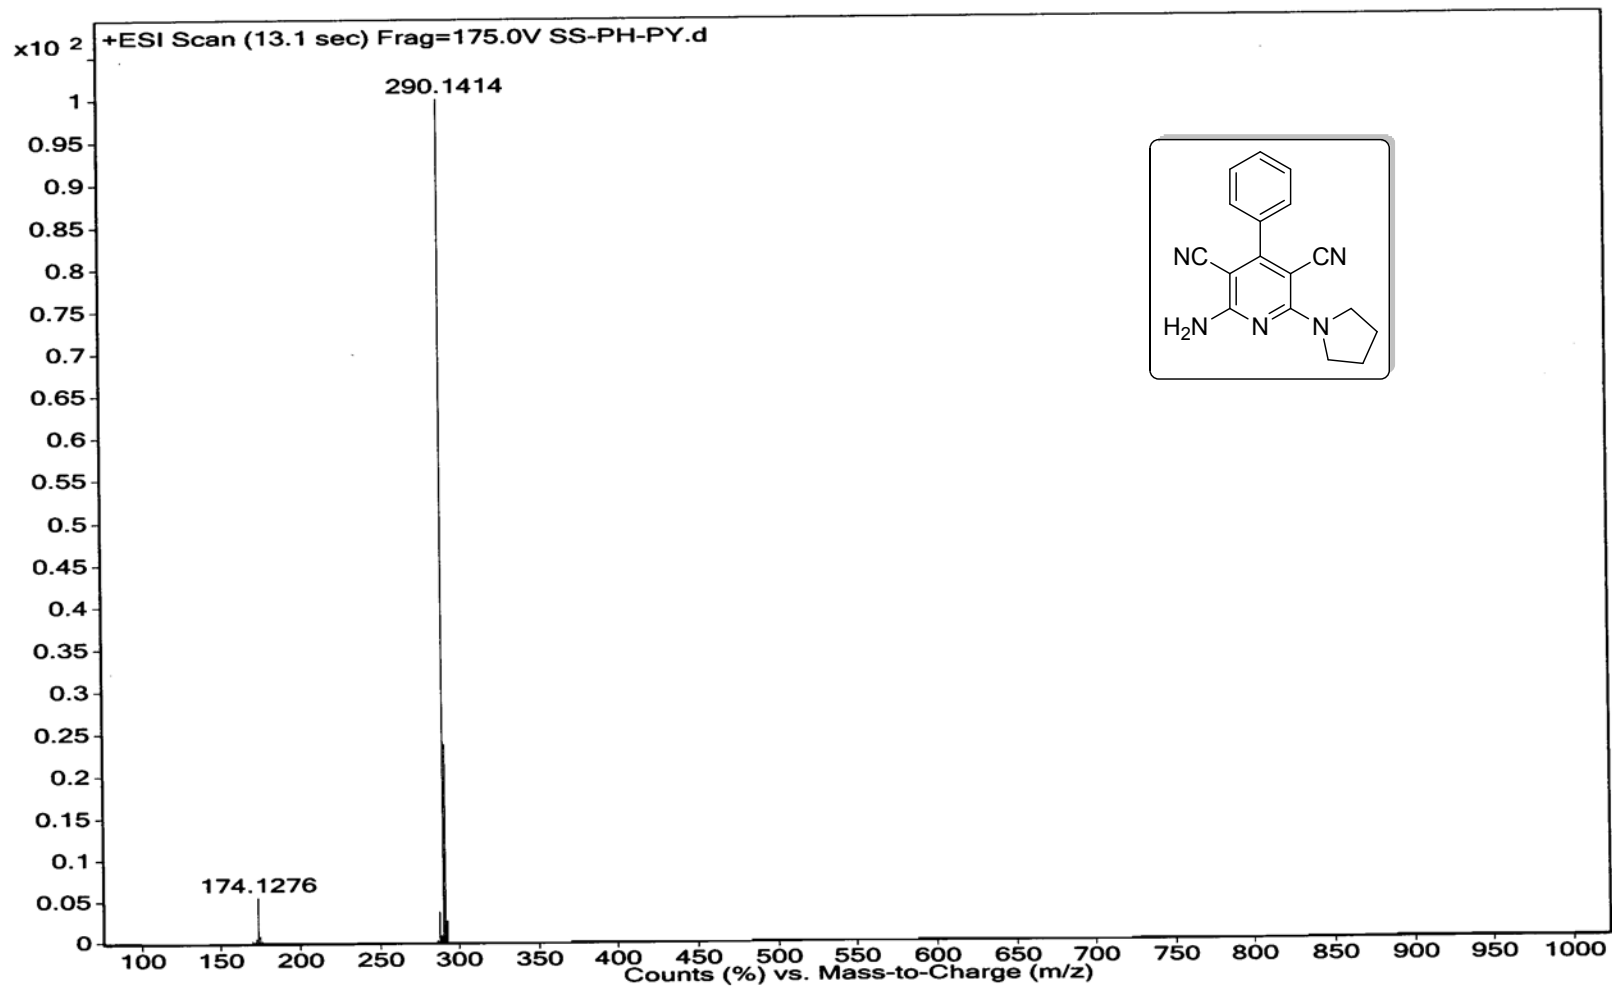

<sup>1</sup>H-NMR spectra of compound 4v

SS-4Me-PhCHO-PY-1H

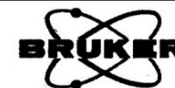

Current Data Parameters  
NAME SS-4Me-PhCHO-PY-1H  
EXPNO 1  
PROCNO 1

F2 - Acquisition Parameters  
Date 20131107  
Time 10.52  
INSTRUM spect  
PROBHD 5 mm PABBO BB/  
PULPROG zg30  
TD 32768  
SOLVENT DMSO  
NS 16  
DS 2  
SWH 12019.230 Hz  
FIDRES 0.366798 Hz  
AQ 1.3631488 sec  
RG 80.22  
DW 41.600 usec  
DE 6.50 usec  
TE 299.3 K  
D1 1.0000000 sec  
TD0 1

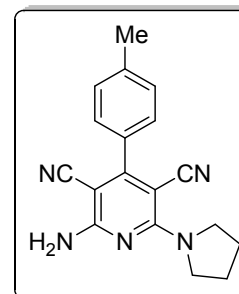

----- CHANNEL f1 -----  
SF01 600.1737063 MHz  
NUC1 1H  
P1 12.00 usec  
PLW1 21.0000000 W

F2 - Processing parameters  
SI 16384  
SF 600.1700054 MHz  
WDW EM  
SSB 0  
LB 0.30 Hz  
GB 0  
PC 1.00

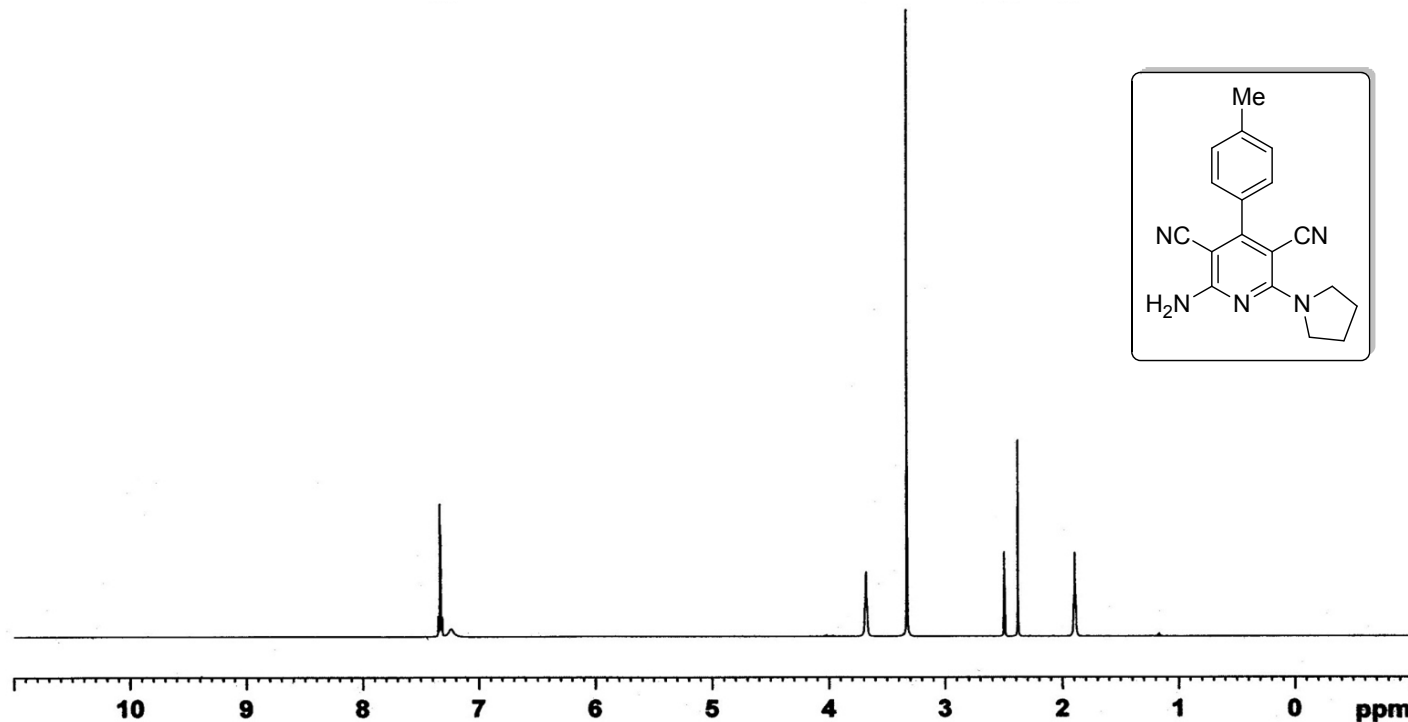

<sup>13</sup>C-NMR spectra of compound 4v



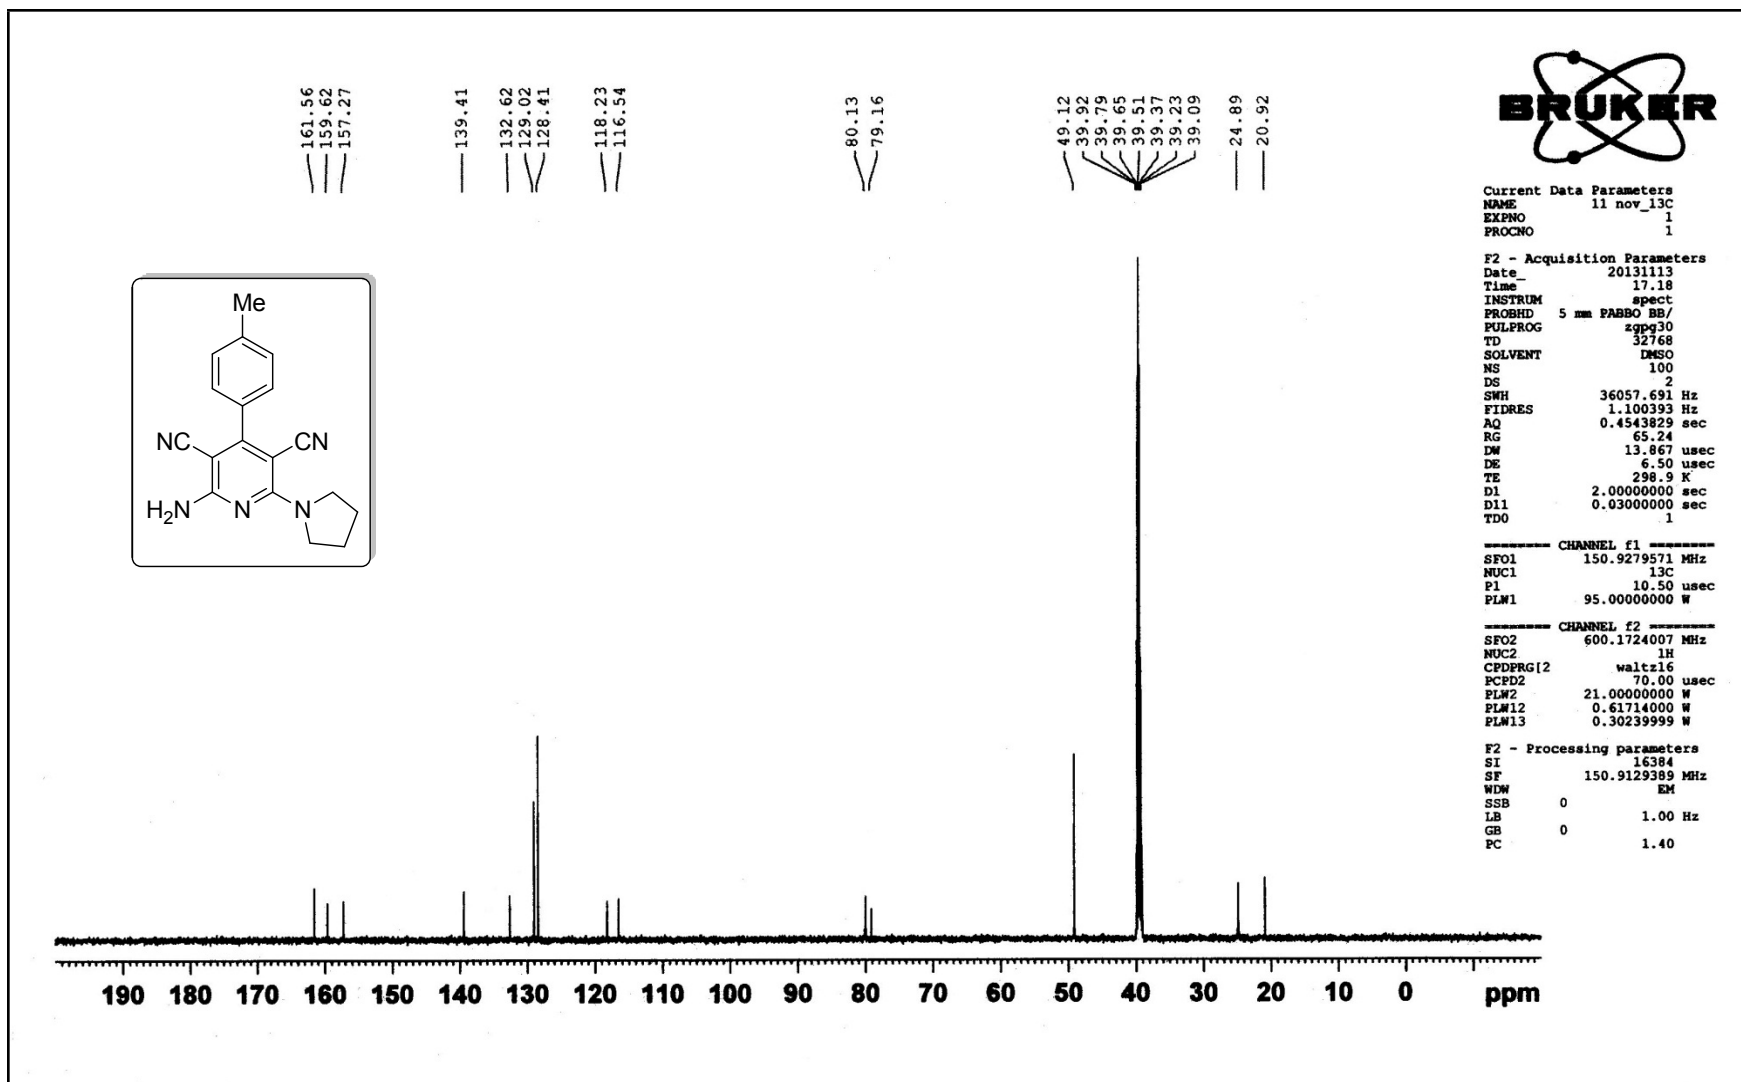

HRMS-spectra of compound 4v

Sample Name SS-4ME-PY  
Inj Vol -10  
Data Filename SS-4ME-PY.d

Position -1  
InjPosition  
ACQ Method

Instrument Name Instrument 1  
SampleType Sample  
Comment

User Name  
IRM Calibration Status Success  
Acquired Time 3/7/2014 11:48:18 AM

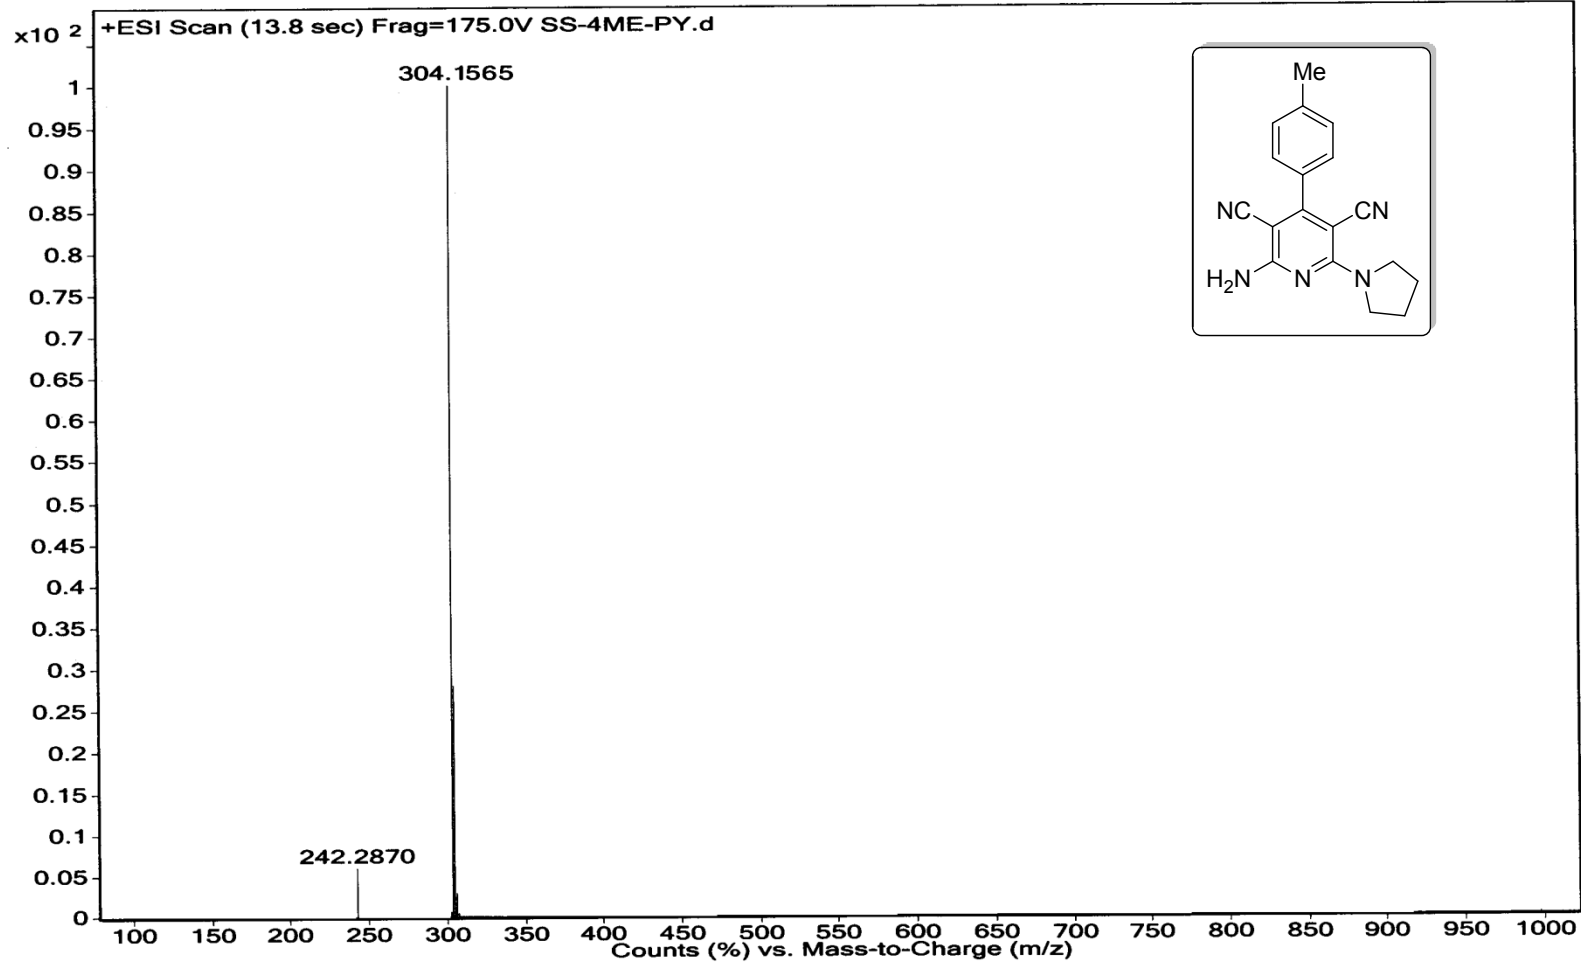

<sup>1</sup>H-NMR spectra of compound **6a**

SS-Ph-BA

Sample Name:  
SS-Ph-BA  
Data Collected on:  
IITG-NMR-mercury400  
Archive directory:  
/home/chem/data/study  
Sample directory:  
MR-CM-Li-S-THR-F1-01  
Fidfile: PROTON

Pulse Sequence: PROTON (s2pul)  
Solvent: dmsc  
Data collected on: May 20 2014

Temp. 25.0 C / 298.1 K  
Operator: chem

Relax. delay 1.000 sec  
Pulse 45.0 degrees  
Acq. time 2.561 sec  
Width 6398.0 Hz  
32 repetitions  
OBSERVE H1, 399.8528627 MHz  
DATA PROCESSING  
FT size 32768  
Total time 2 min 12 sec

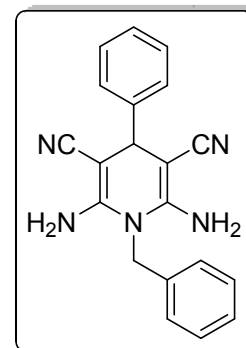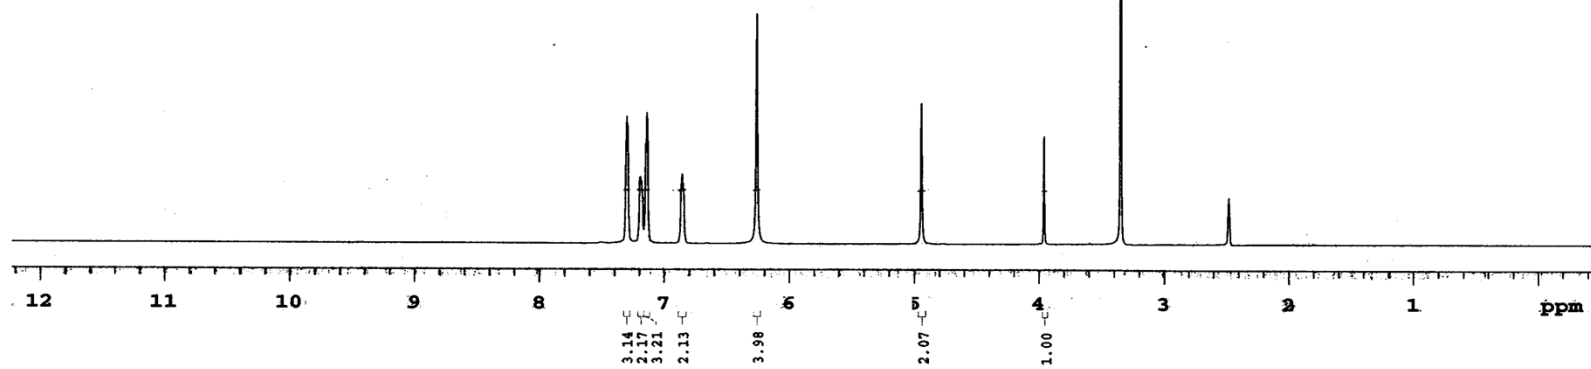

<sup>13</sup>C-NMR spectra of compound 6a

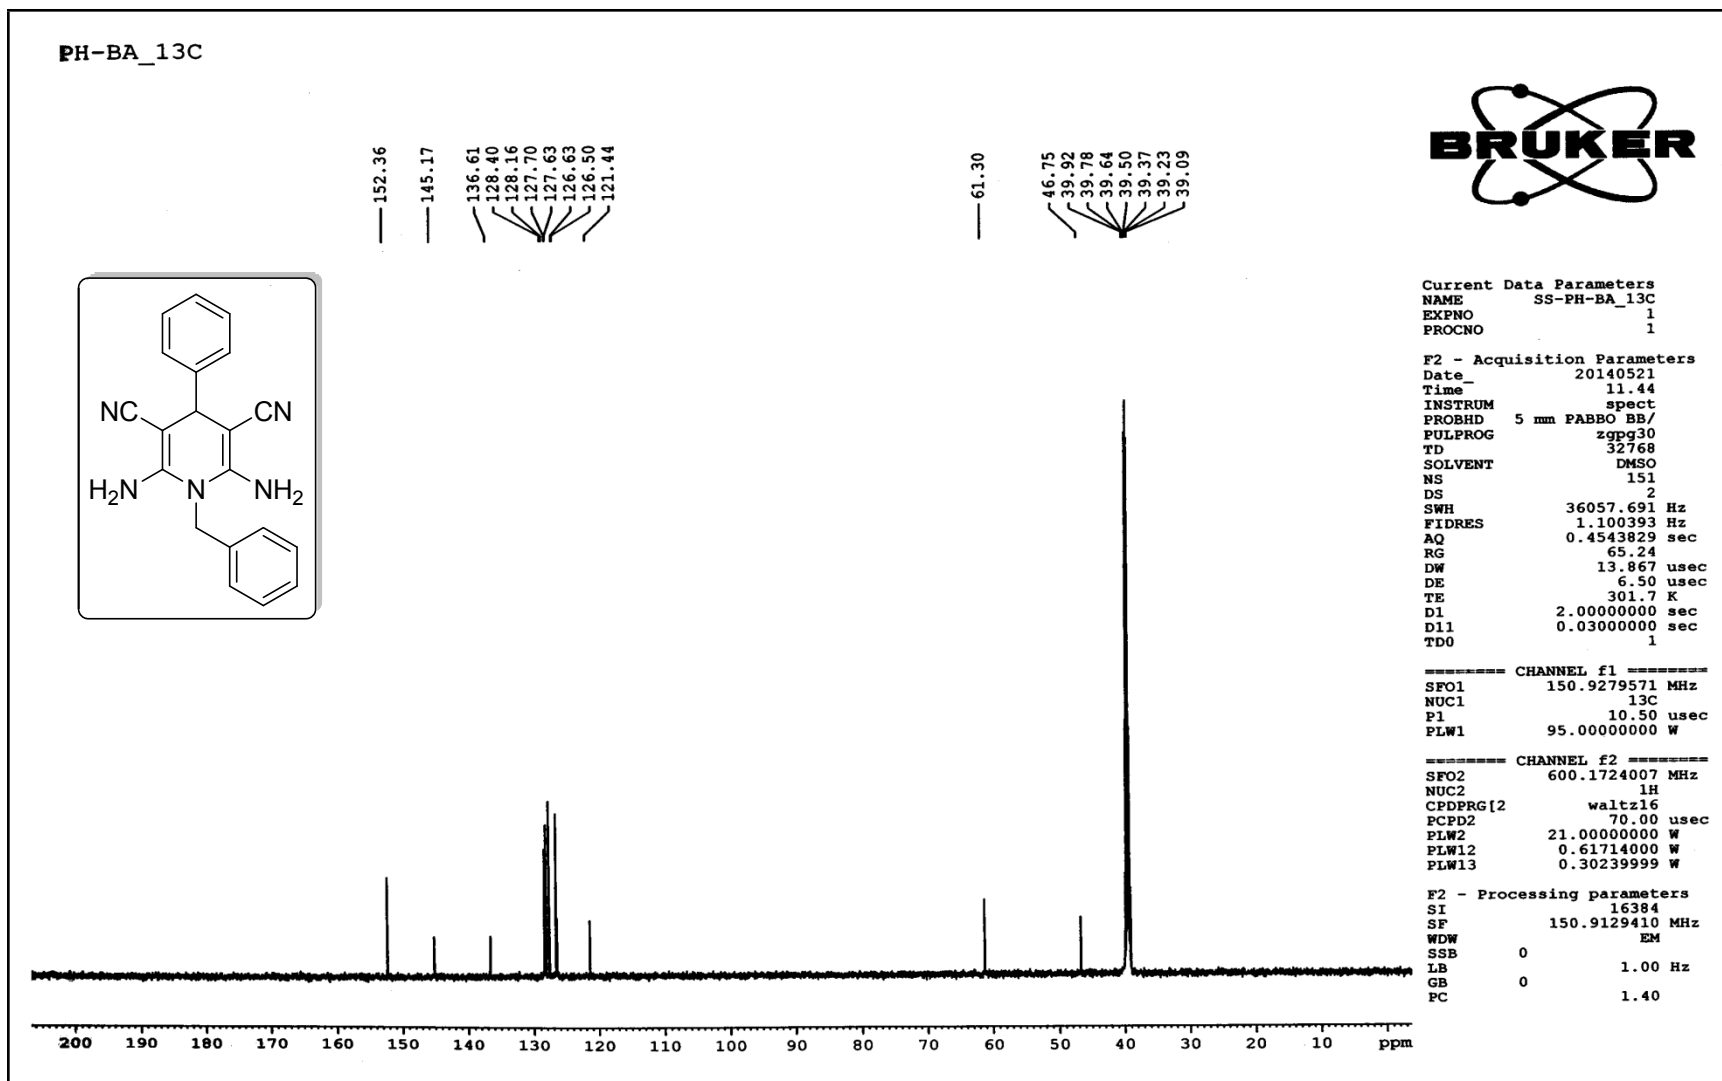

HRMS-spectra of compound 6a

|                      |             |                    |             |                        |                                   |                               |             |
|----------------------|-------------|--------------------|-------------|------------------------|-----------------------------------|-------------------------------|-------------|
| <b>Sample Name</b>   | Unavailable | <b>Position</b>    | Unavailable | <b>Instrument Name</b> | Unavailable                       | <b>User Name</b>              | Unavailable |
| <b>Inj Vol</b>       | Unavailable | <b>InjPosition</b> | Unavailable | <b>SampleType</b>      | Unavailable                       | <b>IRM Calibration Status</b> | Success     |
| <b>Data Filename</b> | SS-PH-BA.d  | <b>ACQ Method</b>  |             | <b>Comment</b>         | Sample information is unavailable | <b>Acquired Time</b>          | Unavailable |

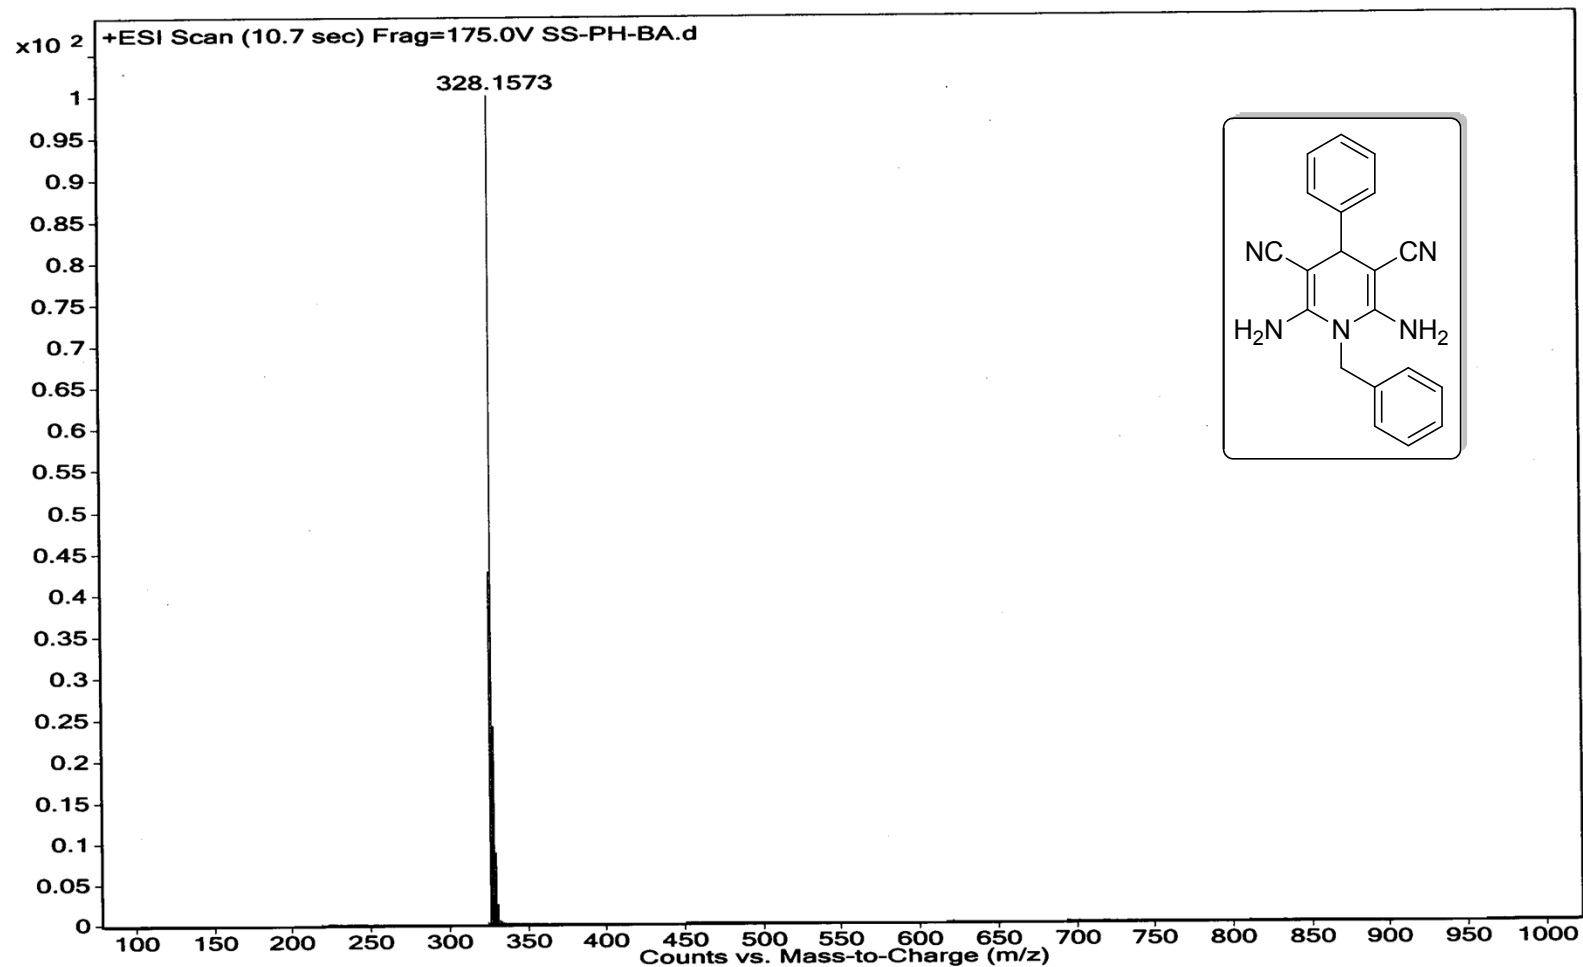

<sup>1</sup>H-NMR spectra of compound **6b**

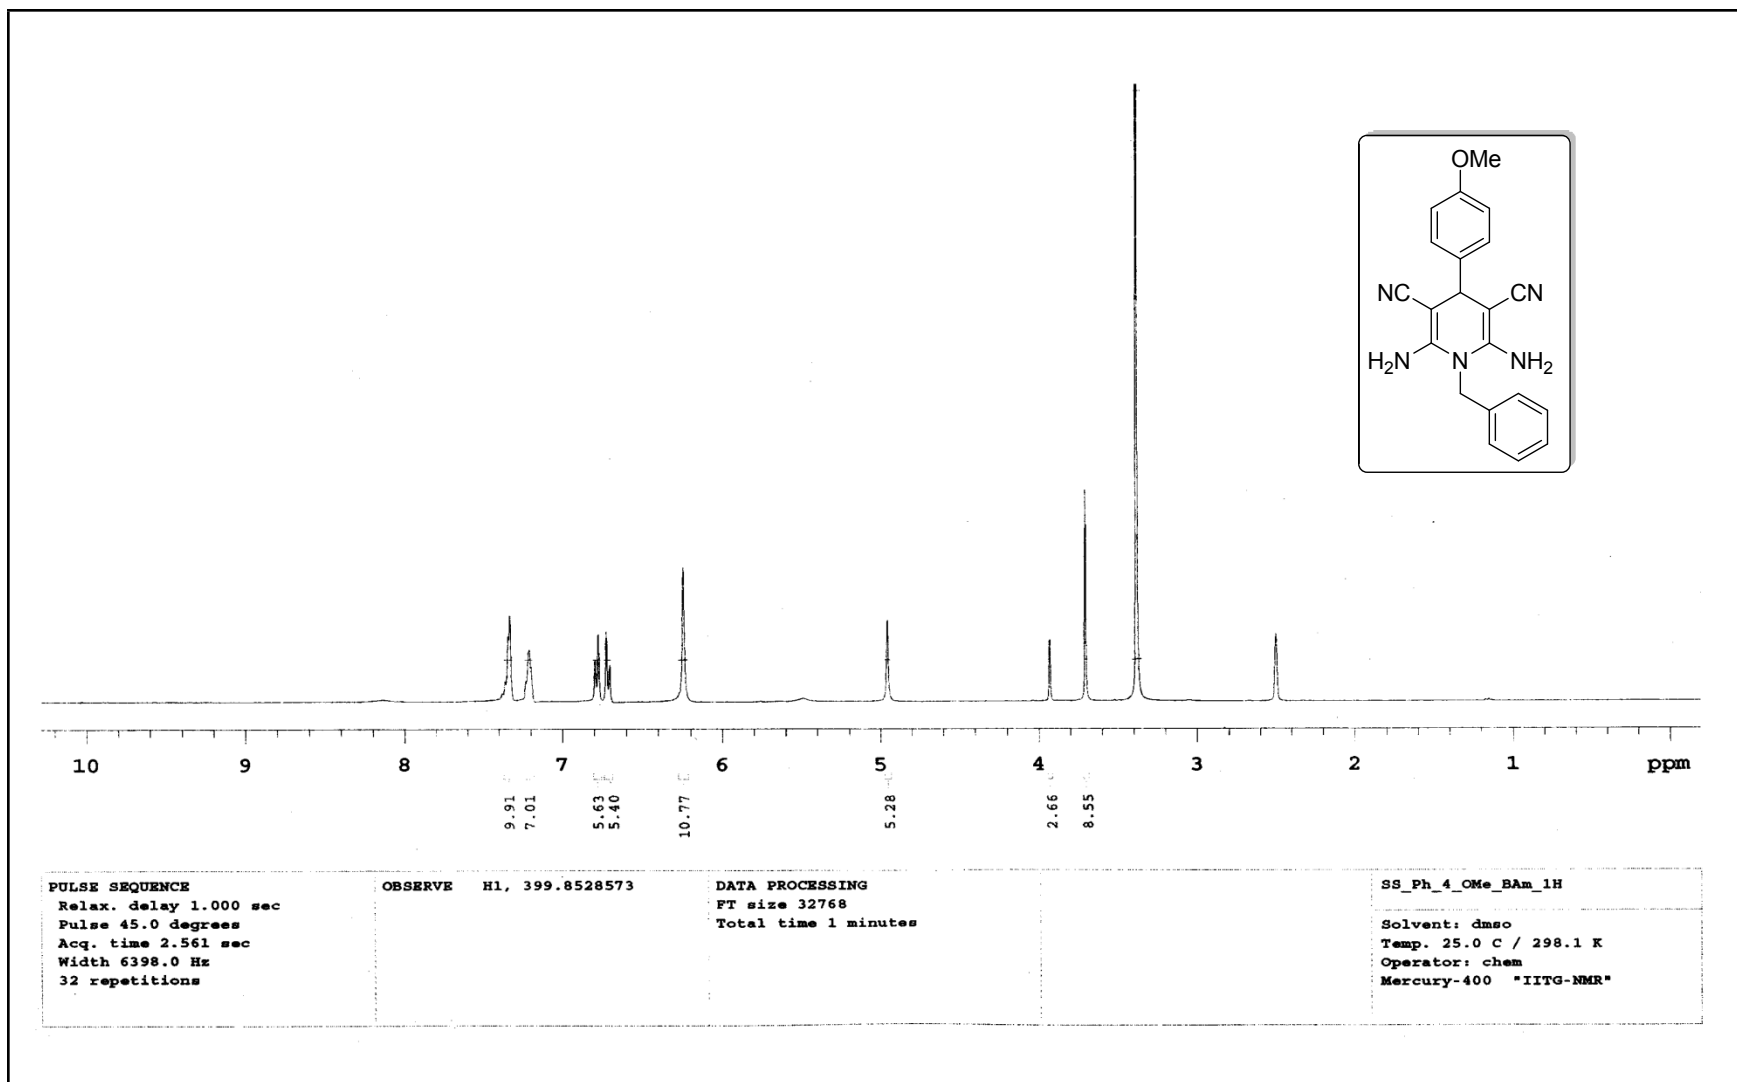

<sup>13</sup>C-NMR spectra of compound **6b**

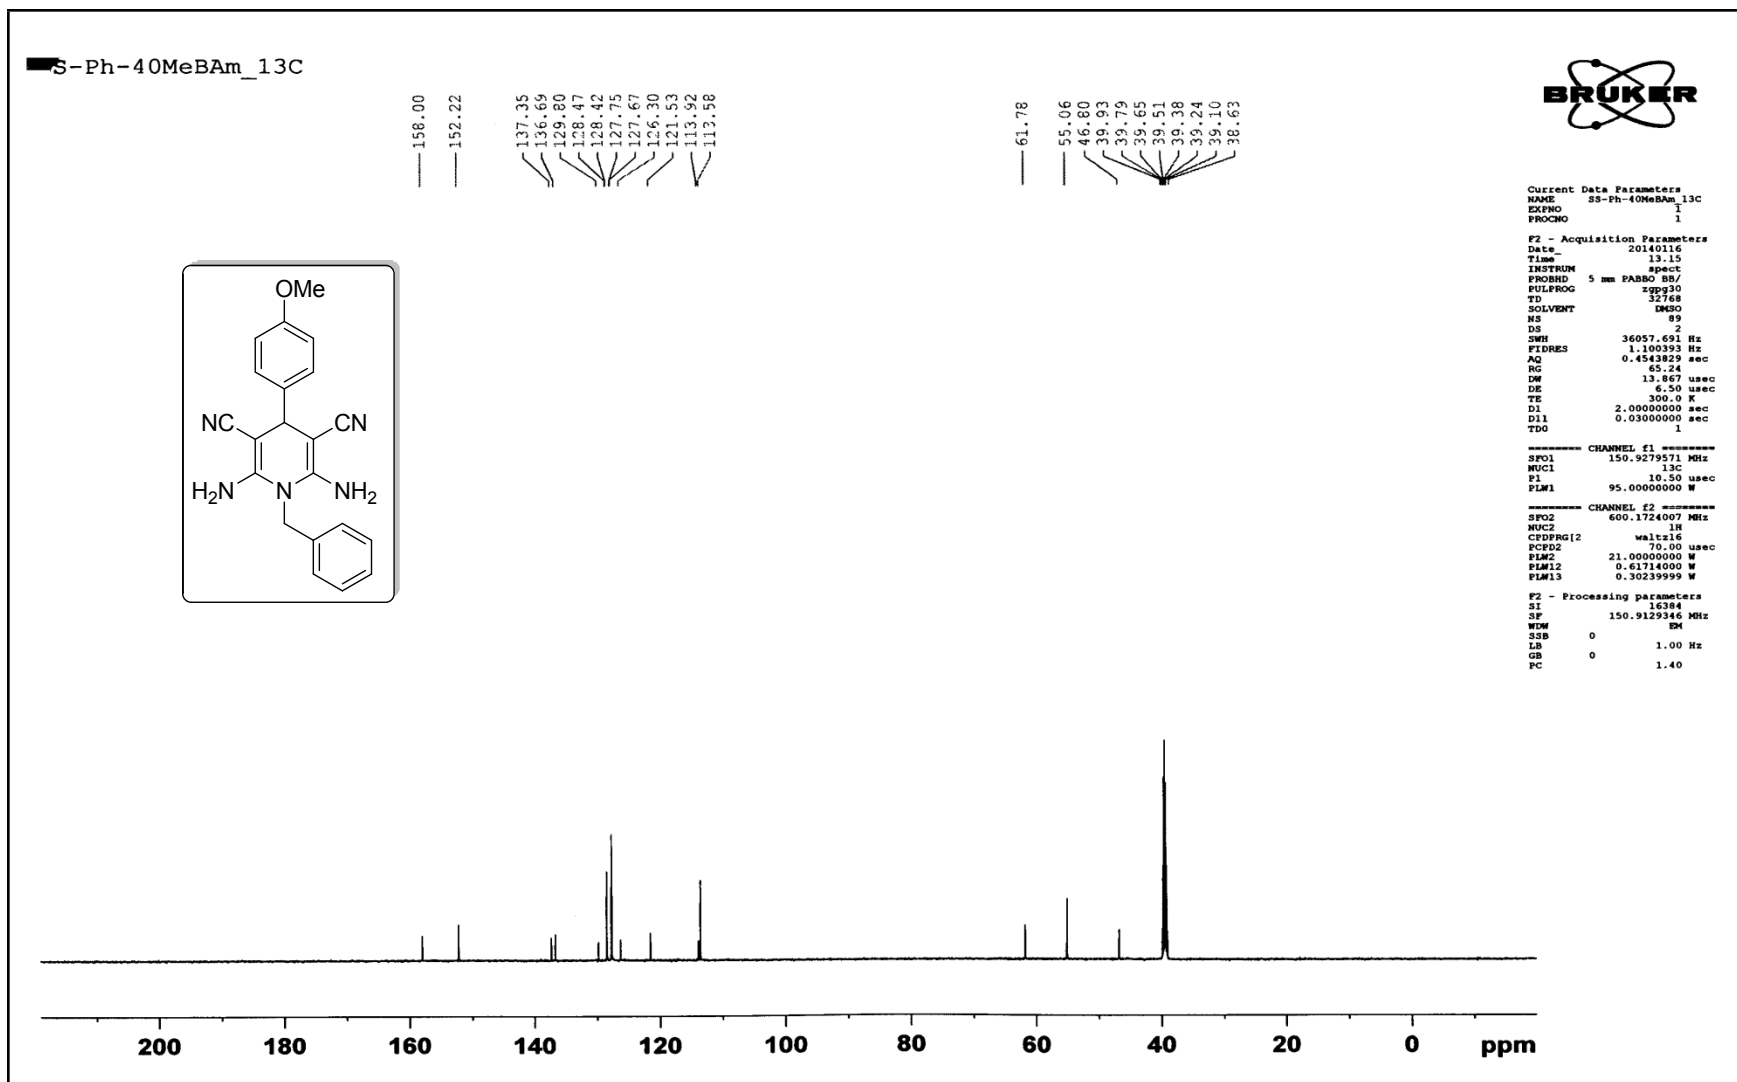

HRMS-spectra of compound **6b**

Sample Name SS-4OME-BA  
Inj Vol -10  
Data Filename SS-4OME-BA.d

Position -1  
InjPosition  
ACQ Method

Instrument Name Instrument 1  
SampleType Sample  
Comment

User Name  
IRM Calibration Status Success  
Acquired Time 3/24/2014 12:06:48 PM

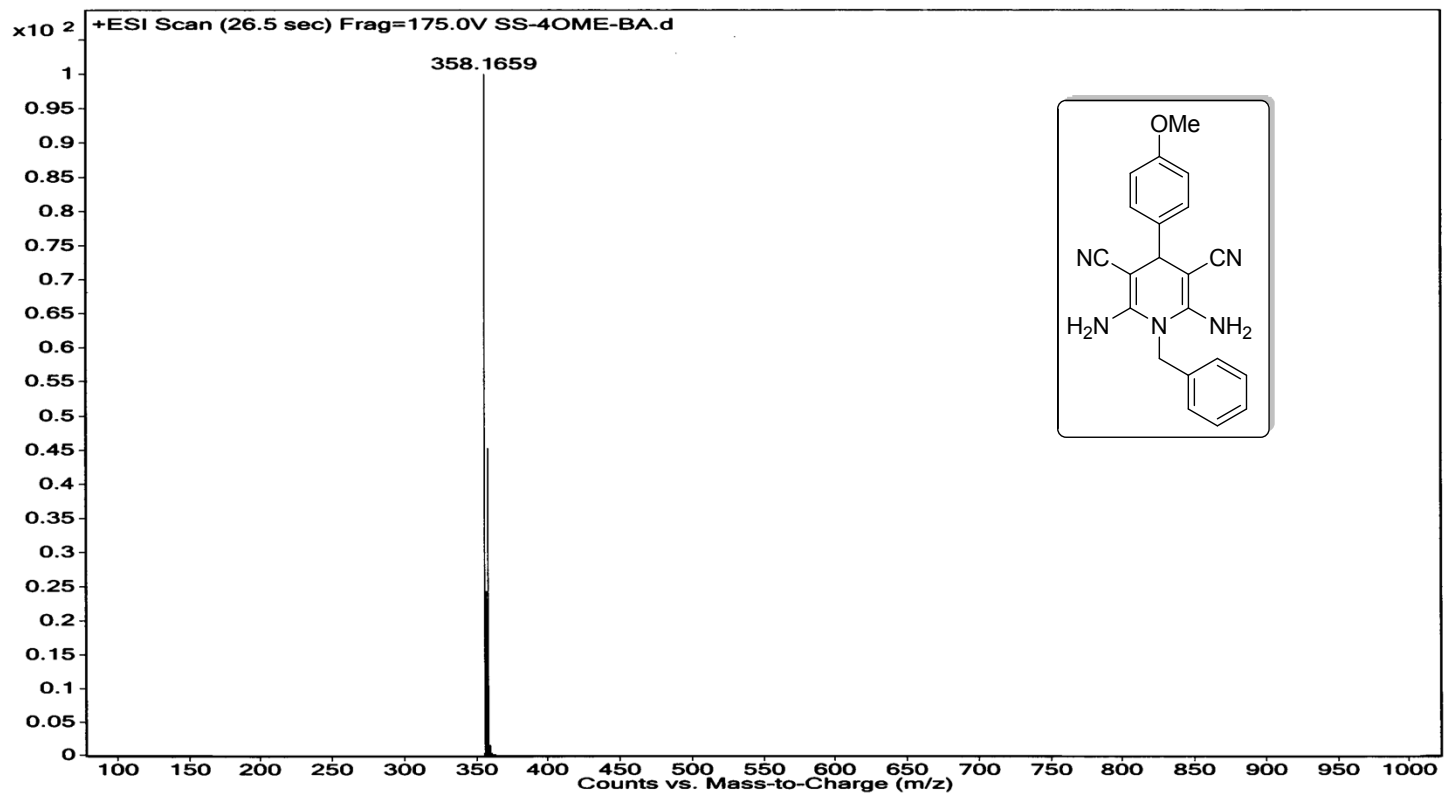



<sup>1</sup>H-NMR spectra of compound 6c

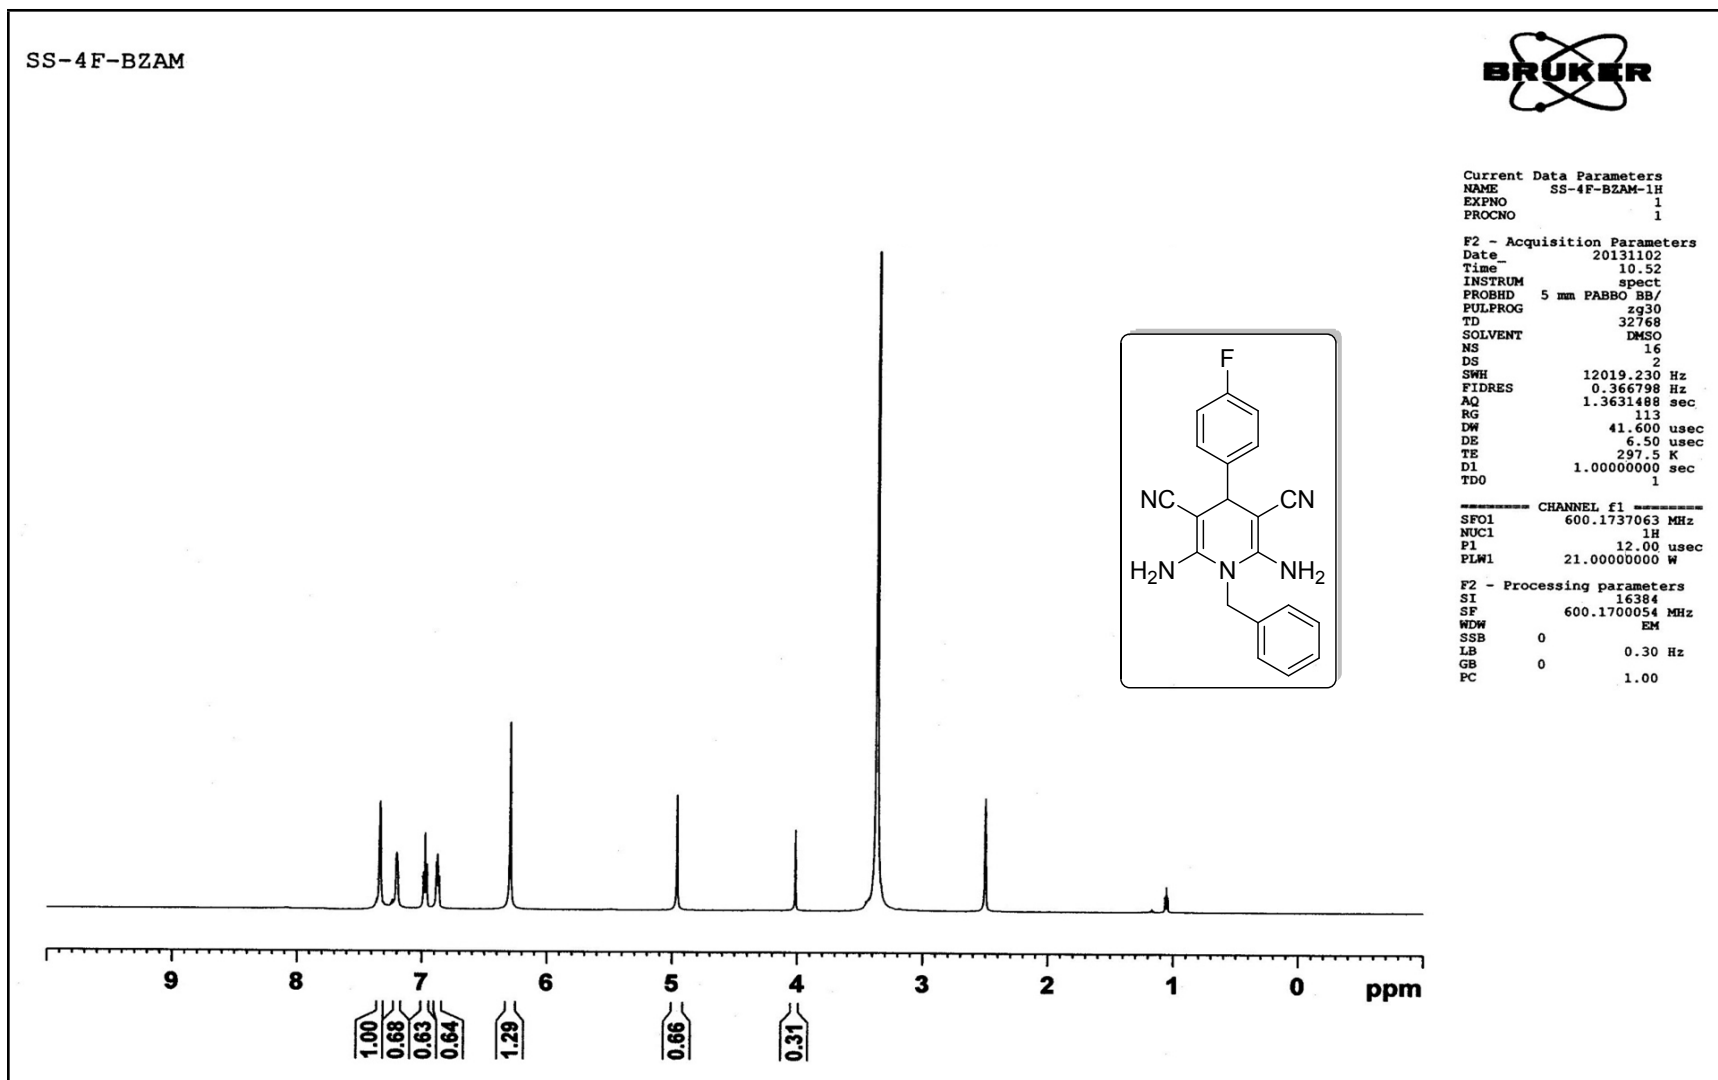

<sup>13</sup>C-NMR spectra of compound 6c

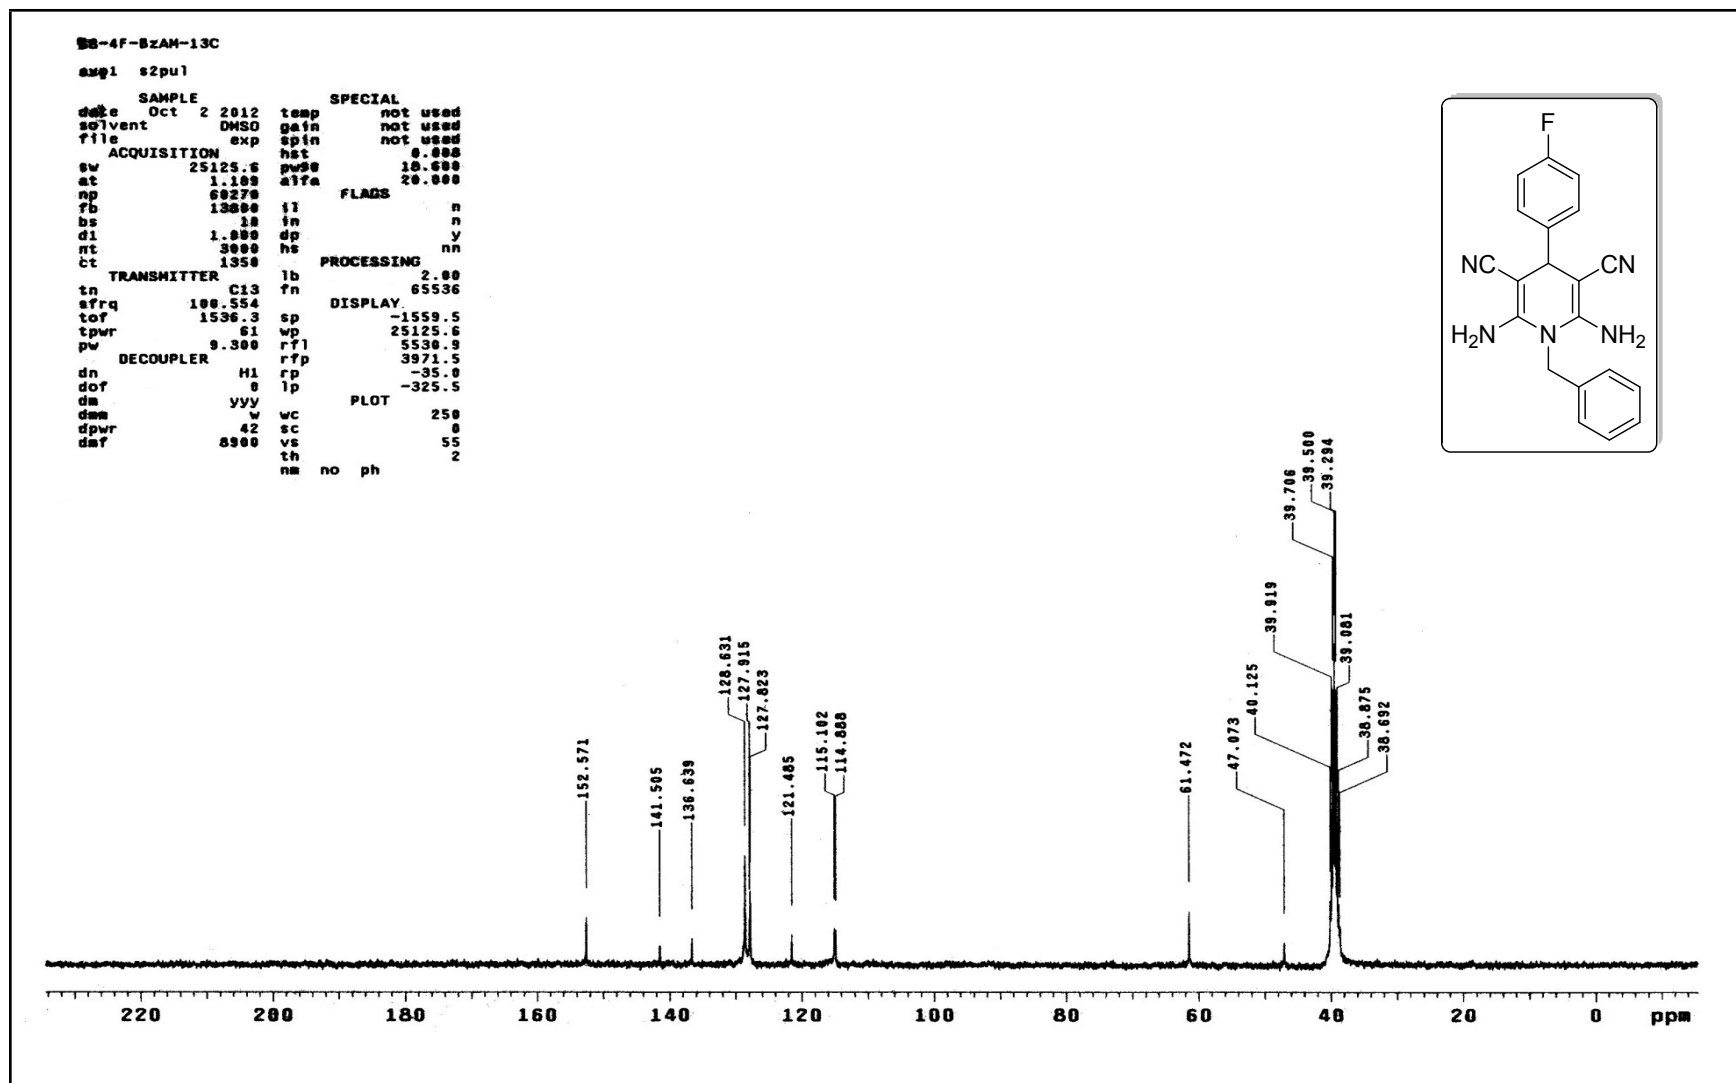

HRMS-spectra of compound 6c

Sample Name SS-4F-BA  
Inj Vol -10  
Data Filename SS-4F-BA.d

Position -1  
InjPosition  
ACQ Method

Instrument Name Instrument 1  
SampleType Sample  
Comment

User Name  
IRM Calibration Status Success  
Acquired Time 4/10/2014 11:34:47 AM

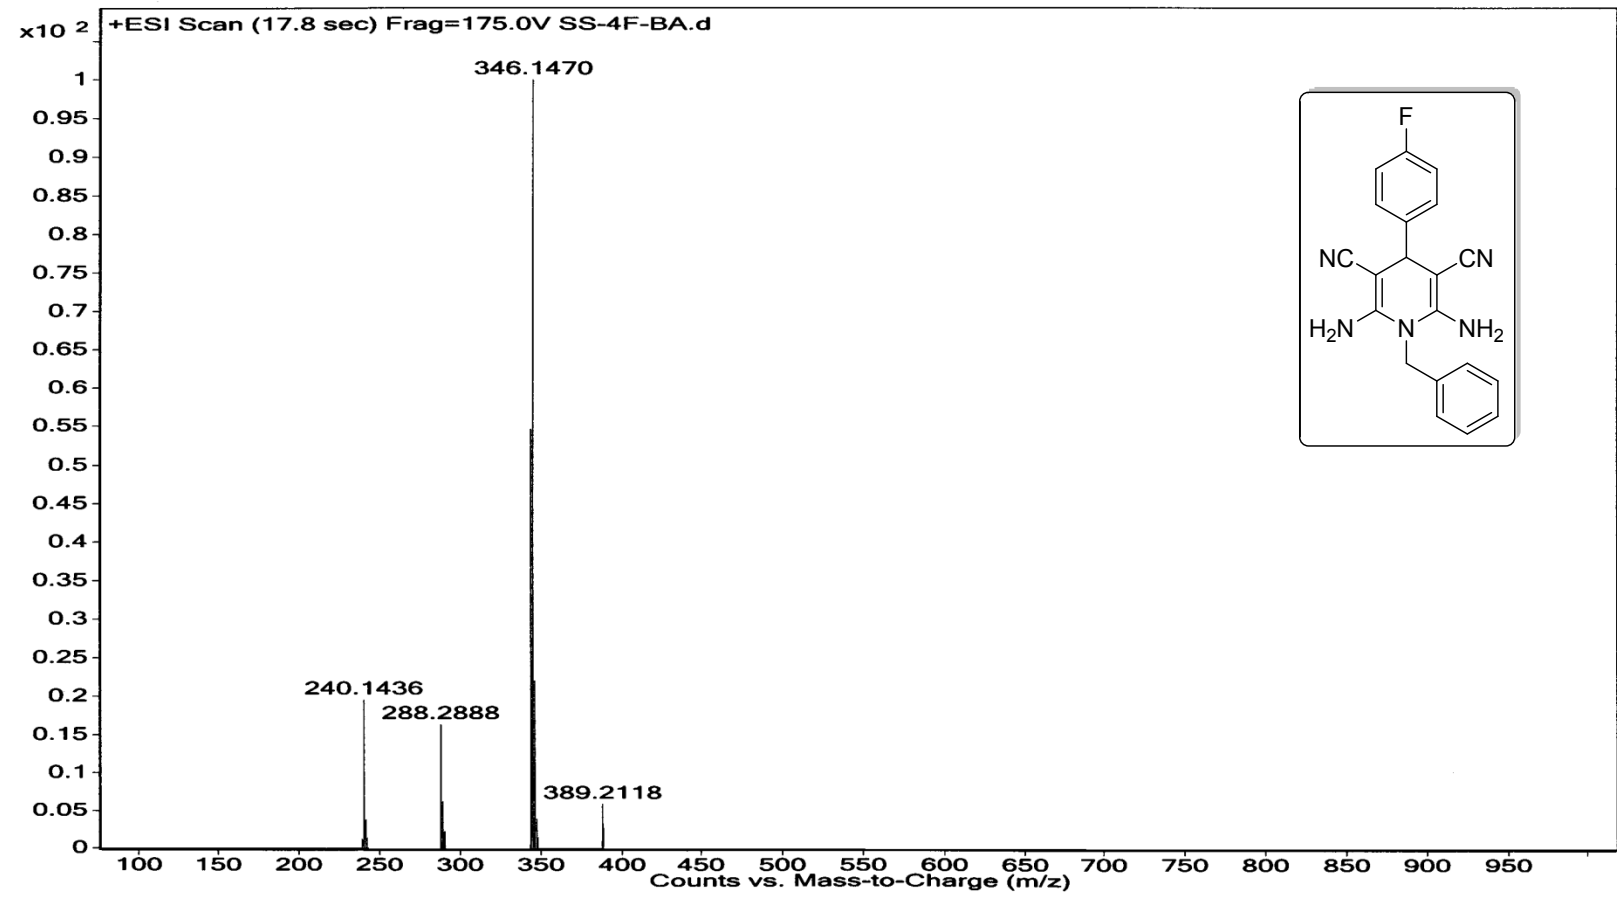

<sup>1</sup>H-NMR spectra of compound **6d**

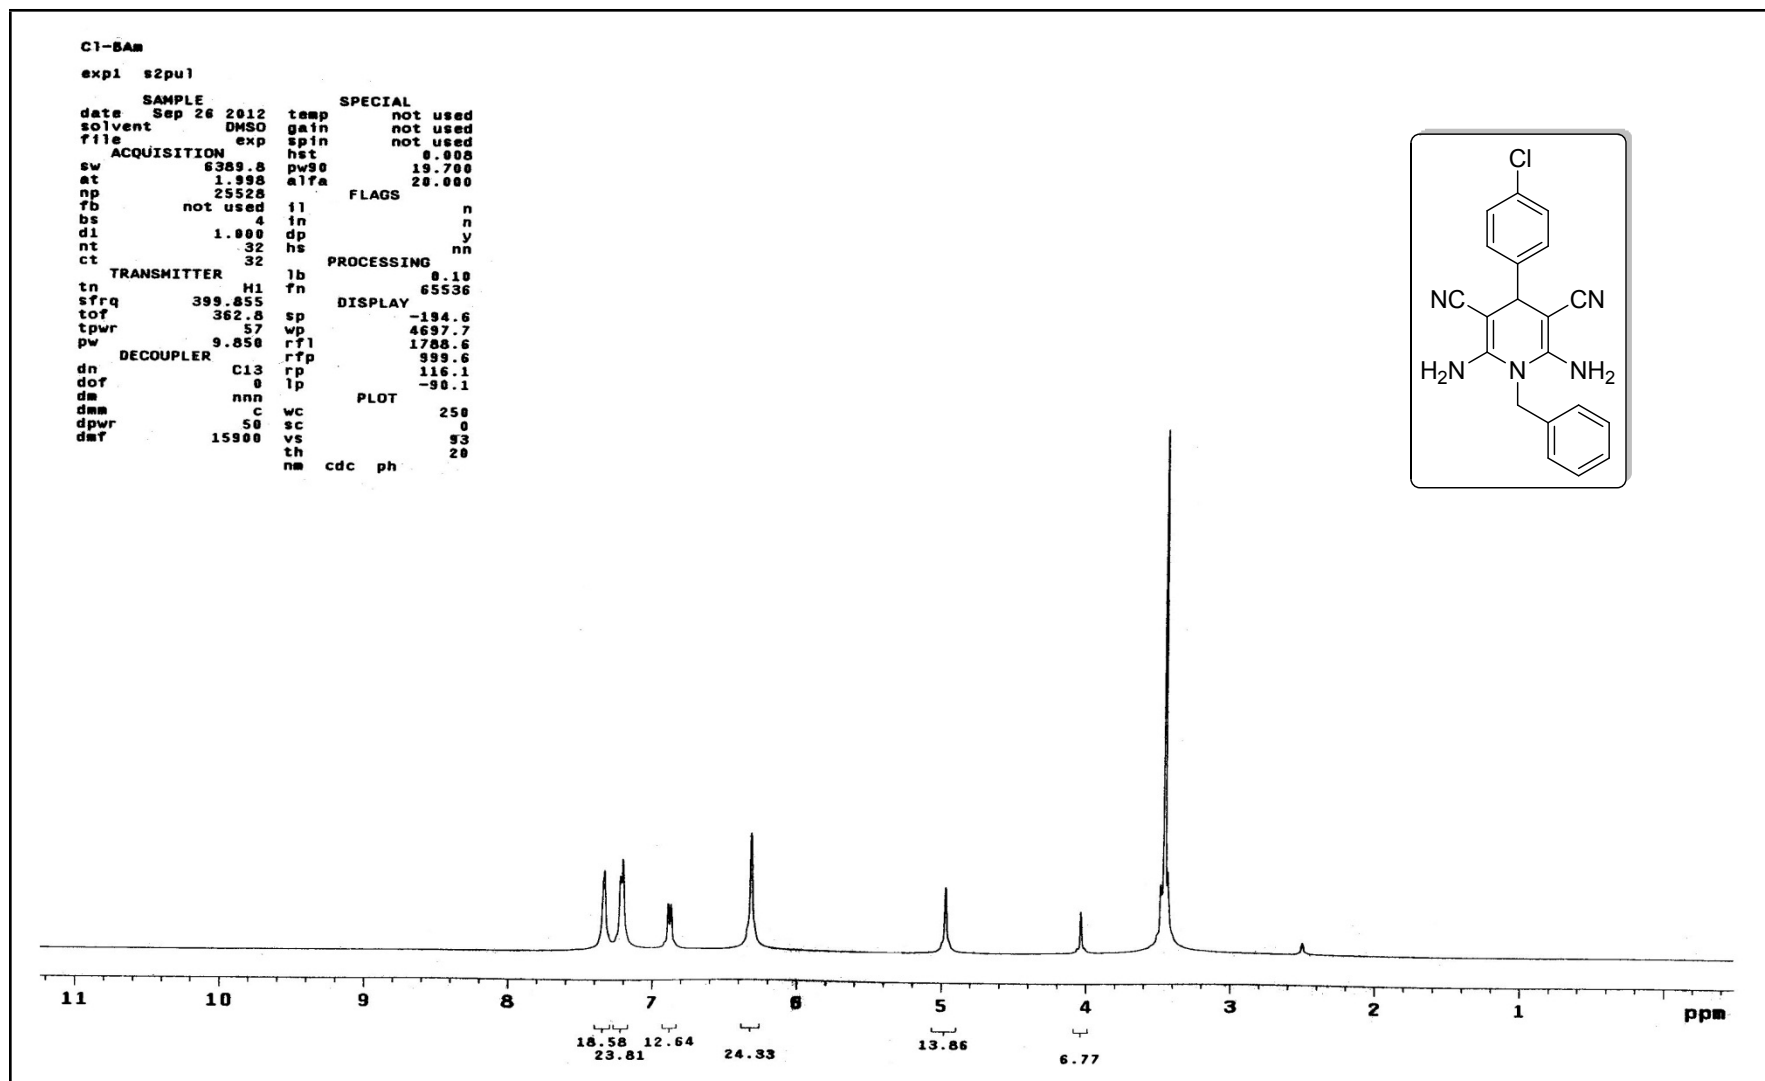

<sup>13</sup>C-NMR spectra of compound **6d**

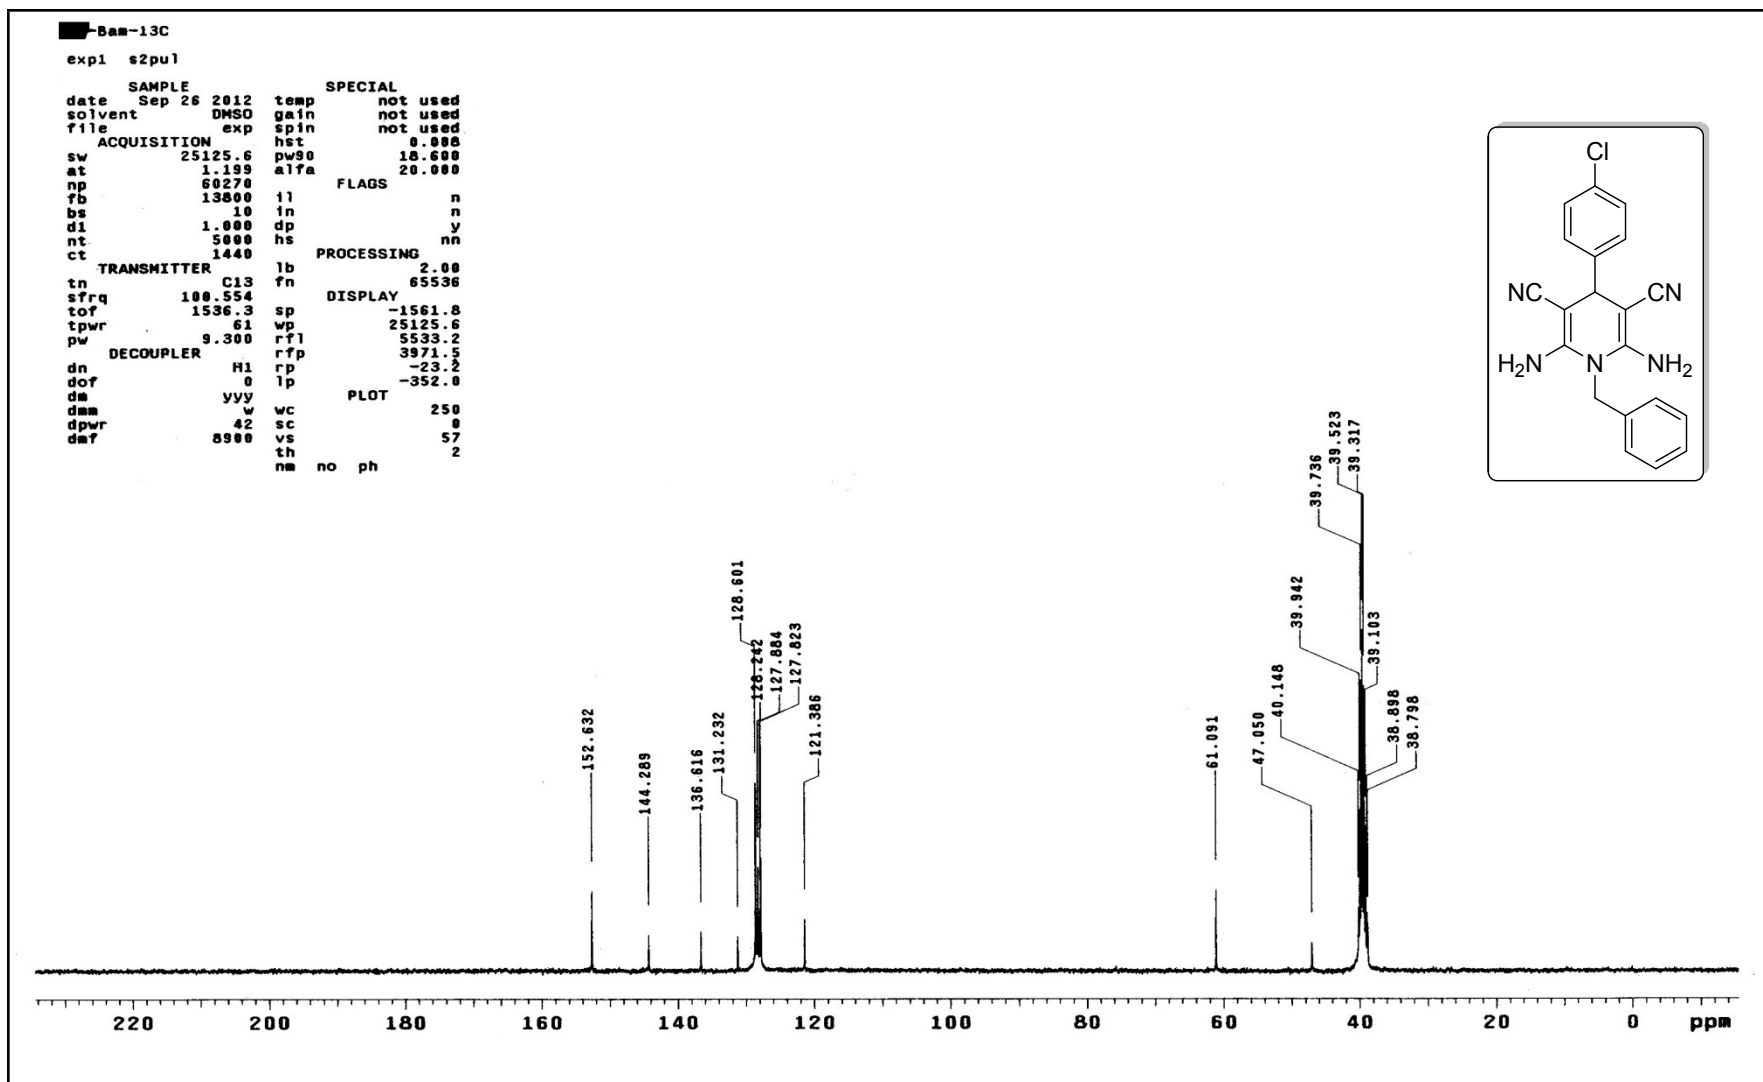

HRMS-spectra of compound **6d**

|                      |             |                    |             |                        |                                   |                               |             |
|----------------------|-------------|--------------------|-------------|------------------------|-----------------------------------|-------------------------------|-------------|
| <b>Sample Name</b>   | Unavailable | <b>Position</b>    | Unavailable | <b>Instrument Name</b> | Unavailable                       | <b>User Name</b>              | Unavailable |
| <b>Inj Vol</b>       | Unavailable | <b>InjPosition</b> | Unavailable | <b>SampleType</b>      | Unavailable                       | <b>IRM Calibration Status</b> | Success     |
| <b>Data Filename</b> | SS-4CL-BA.d | <b>ACQ Method</b>  |             | <b>Comment</b>         | Sample information is unavailable | <b>Acquired Time</b>          | Unavailable |

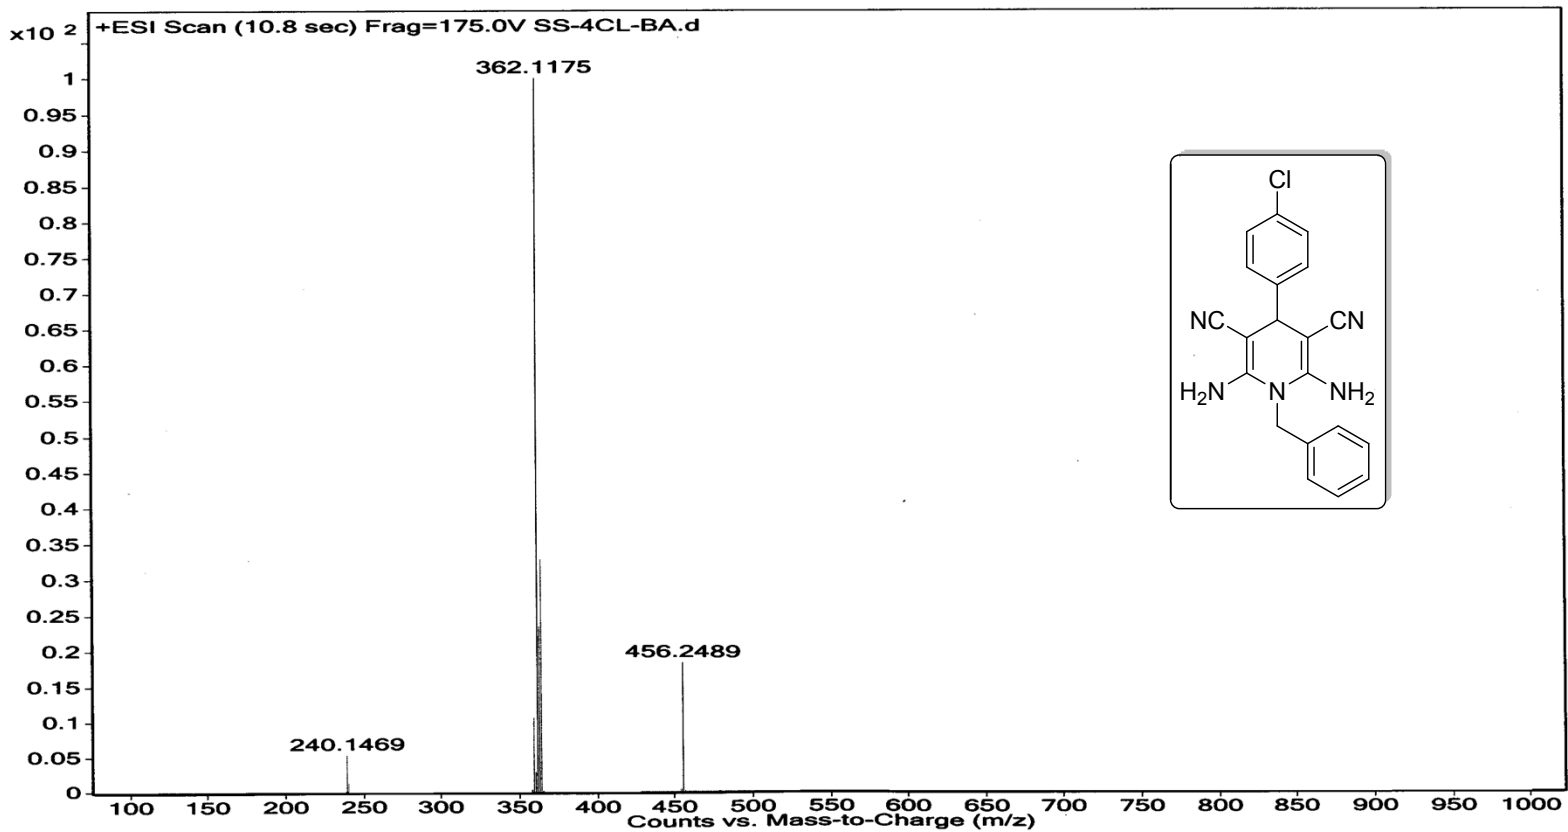

<sup>1</sup>H-spectra of compound 6e

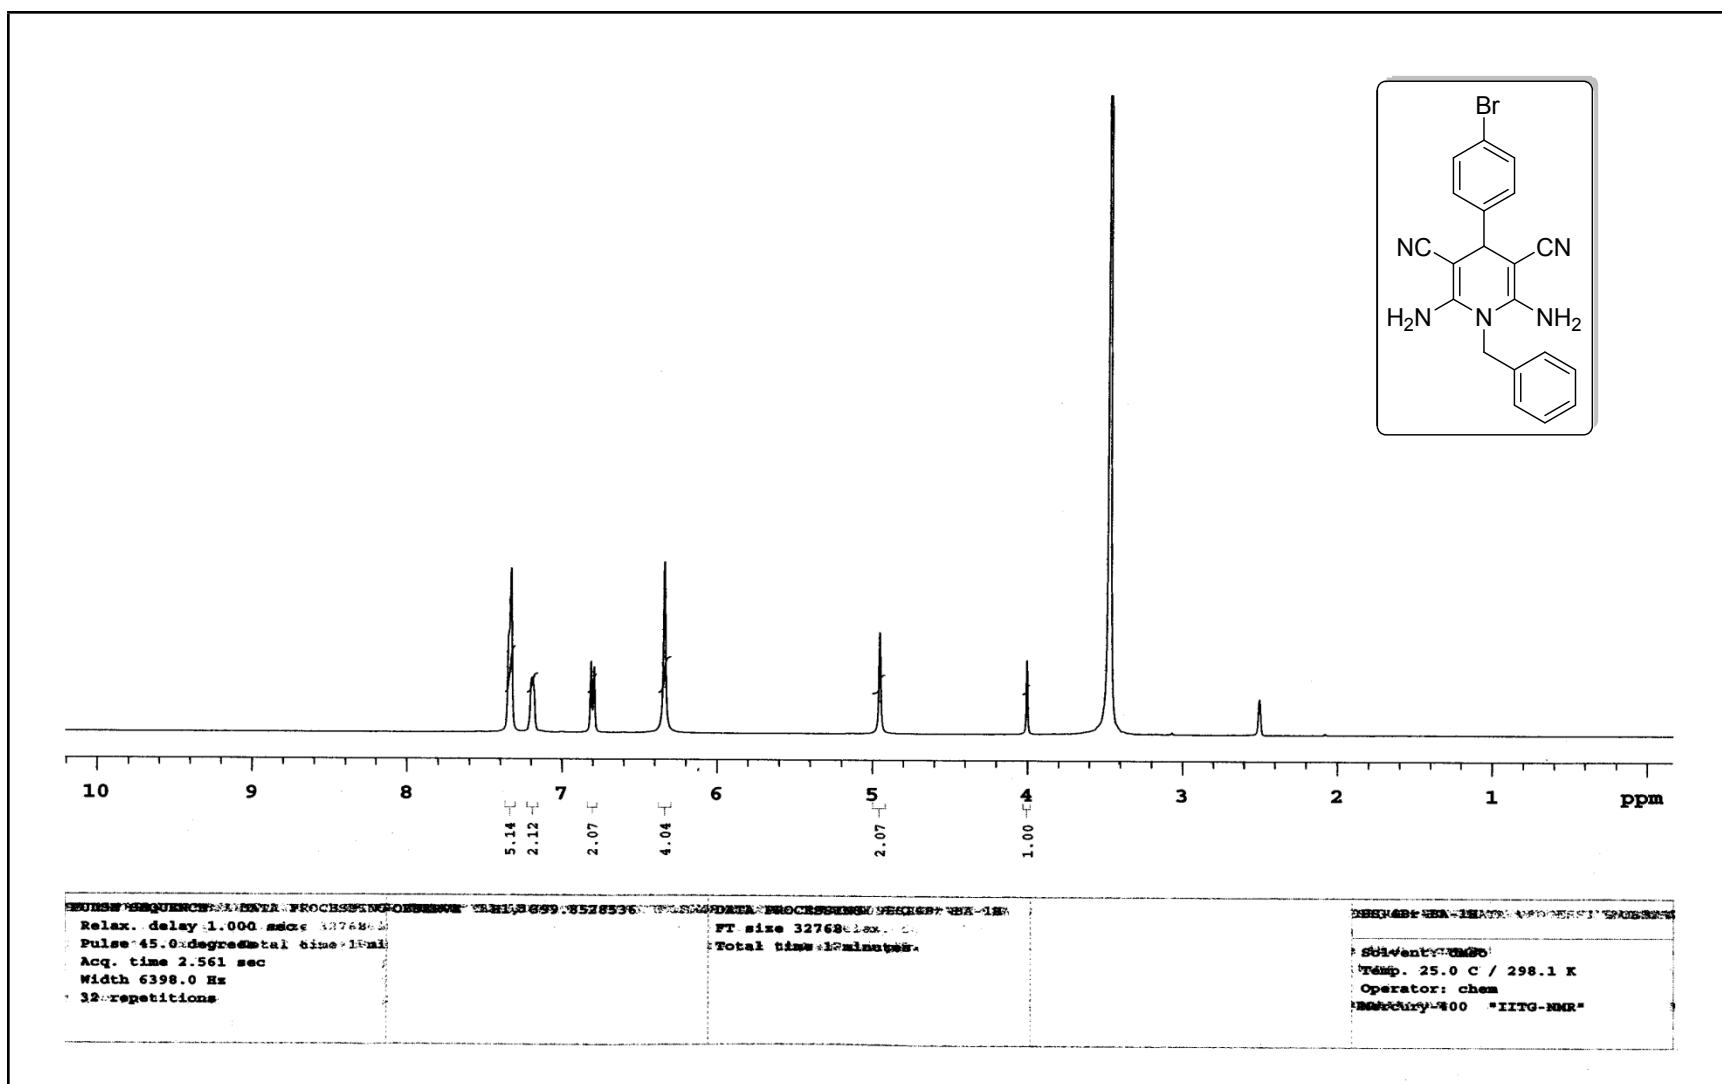

<sup>13</sup>C-spectra of compound 6e

3S-4Br-BA-13C

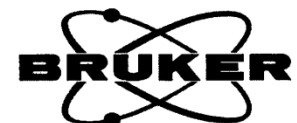

Current Data Parameters  
NAME SS-4Br-BA-13C  
EXPNO 1  
PROCNO 1

F2 - Acquisition Parameters  
Date\_ 20140529  
Time 10.50  
INSTRUM spect  
PROBHD 5 mm PABBO BB/  
PULPROG zgpg30  
TD 32768  
SOLVENT DMSO  
NS 226  
DS 2  
SWH 36057.691 Hz  
FIDRES 1.100393 Hz  
AQ 0.4543829 sec  
RG 65.24  
DW 13.867 usec  
DE 6.50 usec  
TE 299.7 K  
D1 2.0000000 sec  
D11 0.0300000 sec  
TD0 1

===== CHANNEL f1 =====  
SFO1 150.9279571 MHz  
NUC1 13C  
P1 10.50 usec  
PLW1 95.0000000 W

===== CHANNEL f2 =====  
SFO2 600.1724007 MHz  
NUC2 1H  
CPDPRG[2] waltz16  
PCPD2 70.00 usec  
PLW2 21.0000000 W  
PLW12 0.61714000 W  
PLW13 0.30239999 W

F2 - Processing parameters  
SI 16384  
SF 150.9129254 MHz  
WDW EM  
SSB 0  
LB 1.00 Hz  
GB 0  
PC 1.40

152.61  
144.70  
136.58  
131.13  
128.97  
128.59  
127.86  
127.79  
121.36  
119.68

60.95  
46.99  
39.91  
39.78  
39.63  
39.50  
39.36  
39.22  
39.08  
38.84

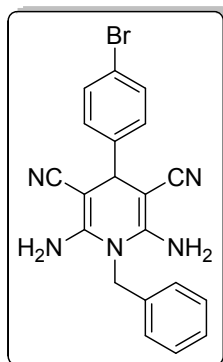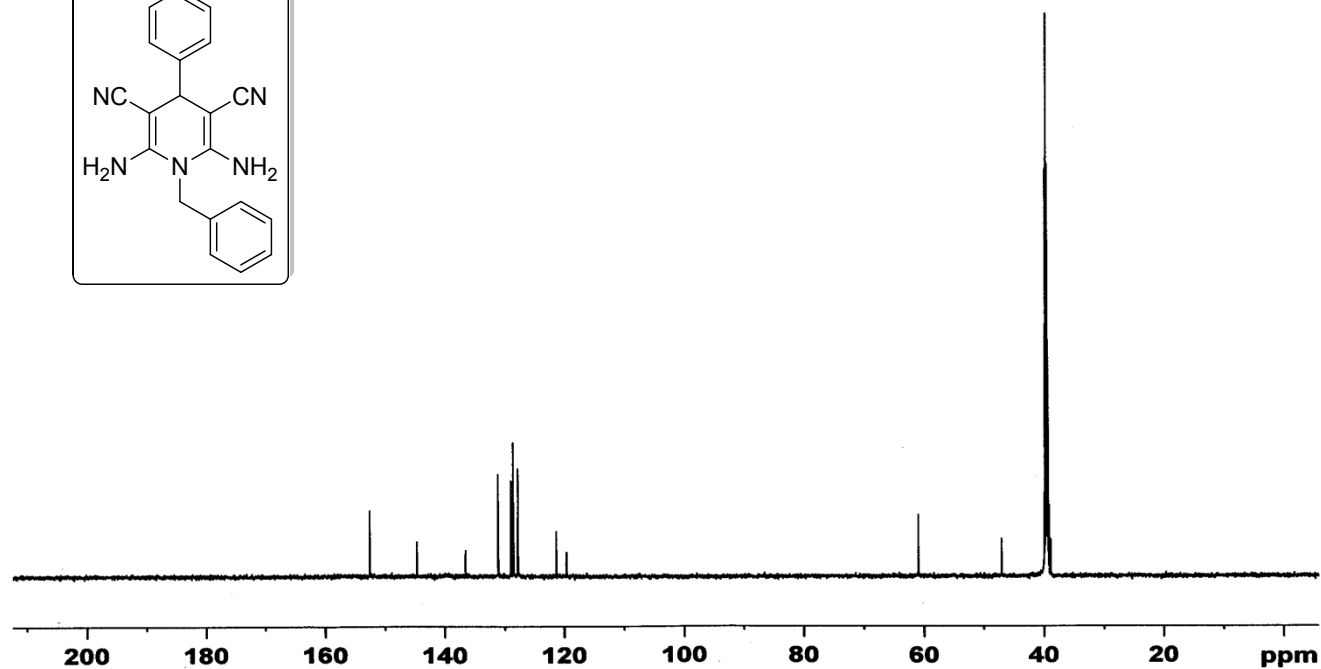

HRMS-spectra of compound 6e



Sample Name  
Inj Vol  
Data Filename

Position  
InjPosition  
ACQ Method

Instrument Name  
SampleType  
Comment

User Name  
IRM Calibration Status  
Acquired Time

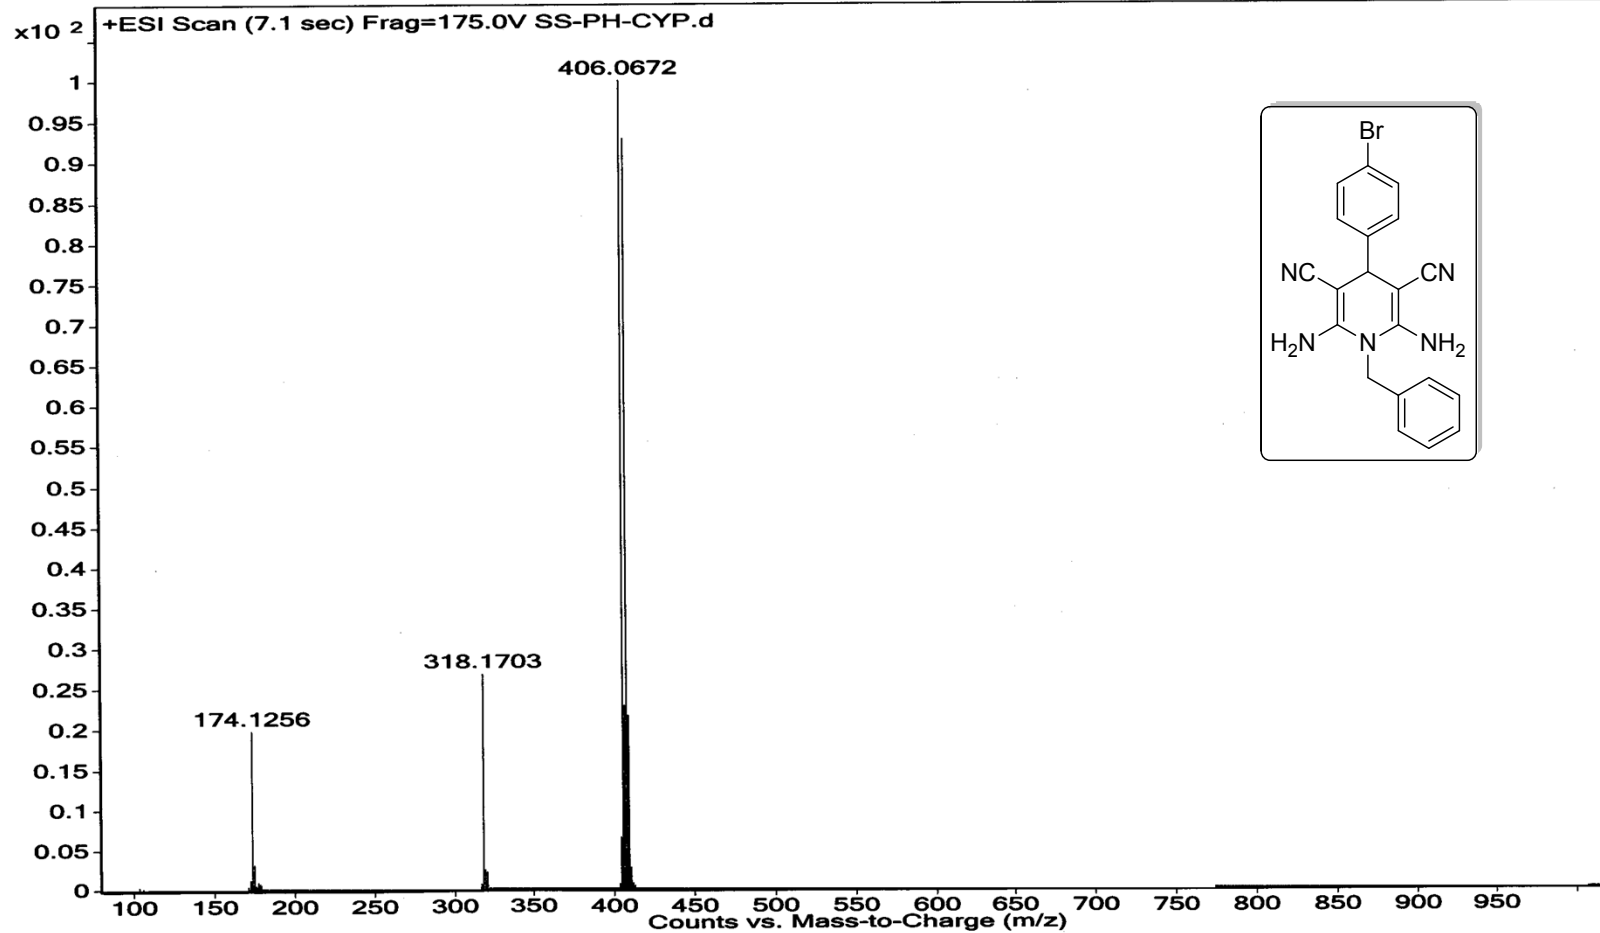

<sup>1</sup>H-spectra of compound 6f

SS-CY-BA\_1H

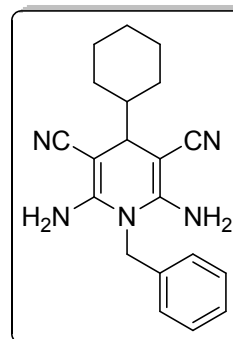

```
Current Data Parameters
NAME      SS-CY-BA_1H
EXPNO    1
PROCNO   1

F2 - Acquisition Parameters
Date_    20140919
Time     11.12
INSTRUM  spect
PROBHD   5 mm PABBO BB/
PULPROG  zg30
TD       32768
SOLVENT  DMSO
NS       16
DS       2
SWH      12019.230 Hz
FIDRES   0.366796 Hz
AQ       1.3631488 sec
RG       15.83
DW       41.600 usec
DE       6.50 usec
TE       298.7 K
D1       1.0000000 sec
TDO      1

===== CHANNEL f1 =====
SFO1     600.1737063 MHz
NUC1     1H
P1       12.00 usec
PLW1     21.00000000 W

F2 - Processing parameters
SI       16384
SF       600.1700051 MHz
WDW      EM
SSB      0
LB       0.30 Hz
GB       0
PC       1.00
```

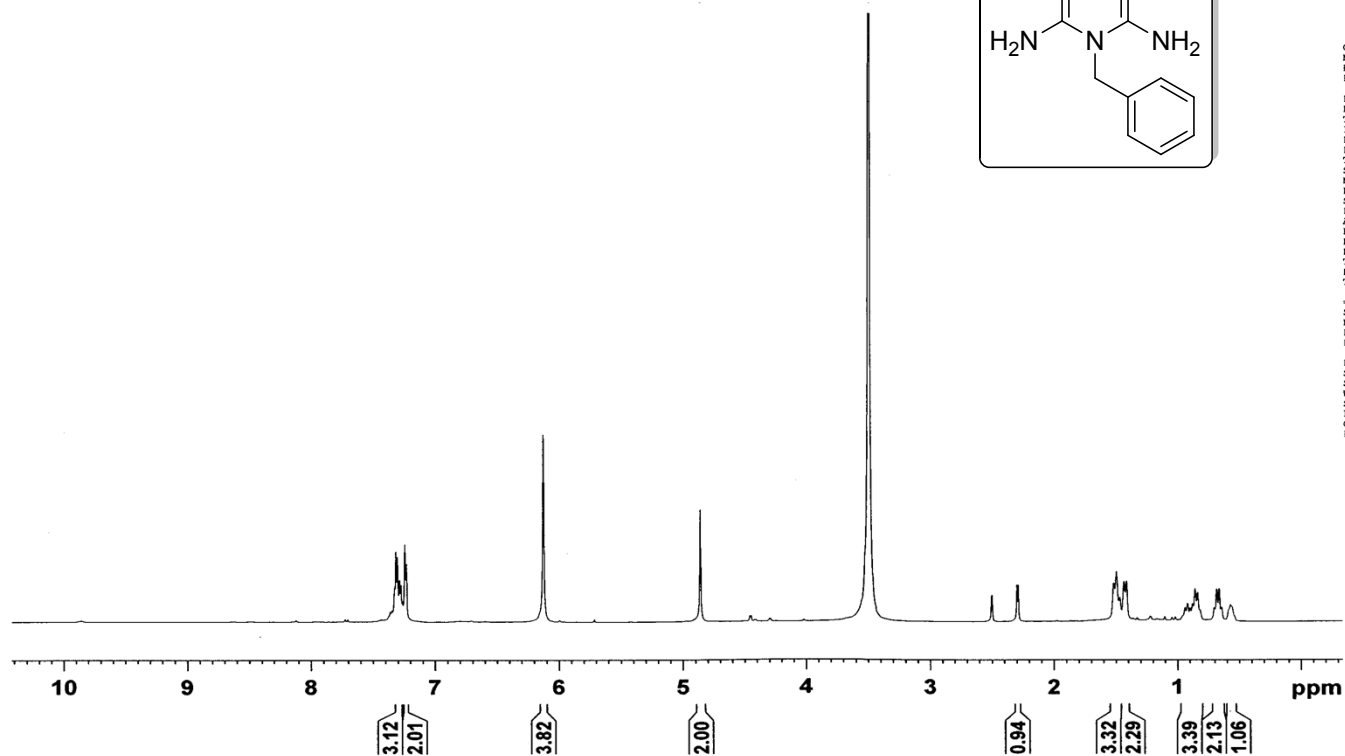

<sup>13</sup>C-spectra of compound 6f

SS-CY-BA\_13C

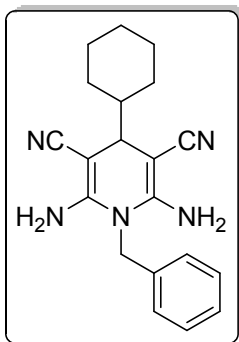

153.14

136.71

128.40

128.38

127.84

122.55

60.04

47.47

46.55

40.12

39.92

39.78

39.64

39.50

39.36

39.22

39.08

29.27

26.11

25.73

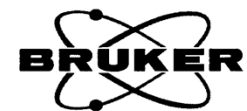

Current Data Parameters  
NAME SS-CY-BA\_13C  
EXPNO 1  
PROCNO 1

F2 - Acquisition Parameters  
Date\_ 20140919  
Time 11.16  
INSTRUM spect  
PROBHD 5 mm PABBO BB/  
PULPROG zgpg30  
TD 32768  
SOLVENT DMSO  
NS 291  
DS 2  
SWH 36057.691 Hz  
FIDRES 1.100393 Hz  
AQ 0.4543829 sec  
RG 65.24  
DW 13.867 usec  
DE 6.50 usec  
TE 298.8 K  
D1 2.0000000 sec  
D11 0.0300000 sec  
TD0 1

===== CHANNEL f1 =====  
SFO1 150.9279571 MHz  
NUC1 13C  
P1 10.50 usec  
PLW1 95.0000000 W

===== CHANNEL f2 =====  
SFO2 600.1724007 MHz  
NUC2 1H  
CPDPRG2 waltz16  
PCPD2 70.00 usec  
PLW2 21.0000000 W  
PLW12 0.61714000 W  
PLW13 0.30239999 W

F2 - Processing parameters  
SI 16384  
SF 150.9129176 MHz  
WDW EM  
SSB 0  
LB 1.00 Hz  
GB 0  
PC 1.40

200 190 180 170 160 150 140 130 120 110 100 90 80 70 60 50 40 30 20 10 ppm

<sup>1</sup>H-spectra of compound 6g

SS-Ph-F

Sample Name:  
SS-Ph-F  
Data Collected on:  
IITG-NMR-mercury400  
Archive directory:  
/home/chem/data/study  
Sample directory:  
MR-CM-Li-S-THR-F1-01  
FidFile: PROTON

Pulse Sequence: PROTON (s2pul)  
Solvent: dms  
Data collected on: May 20 2014

Temp. 25.0 C / 298.1 K  
Operator: chem

Relax. delay 1.000 sec  
Pulse 45.0 degrees  
Acq. time 2.561 sec  
Width 6398.0 Hz  
32 repetitions  
OBSERVE H1, 399.8528540 MHz  
DATA PROCESSING  
FT size 32768  
Total time 2 min 12 sec

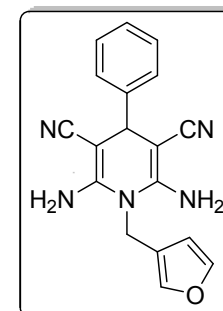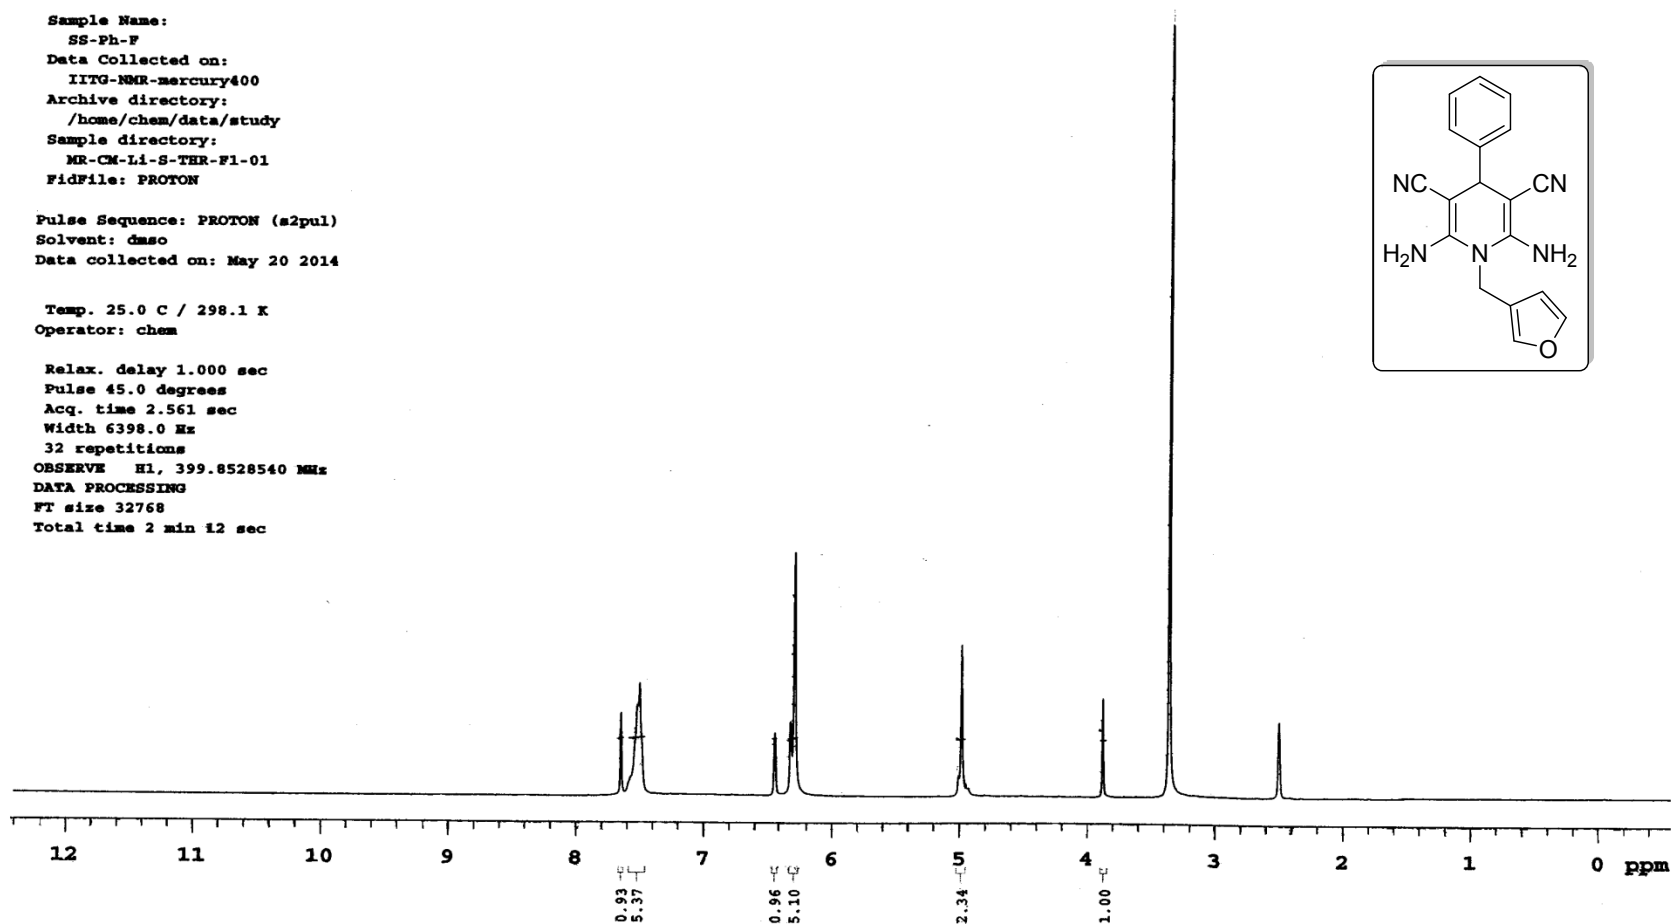

<sup>13</sup>C-spectra of compound 6g

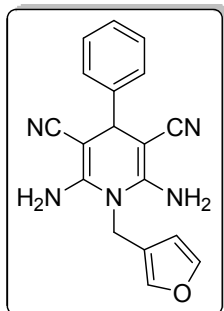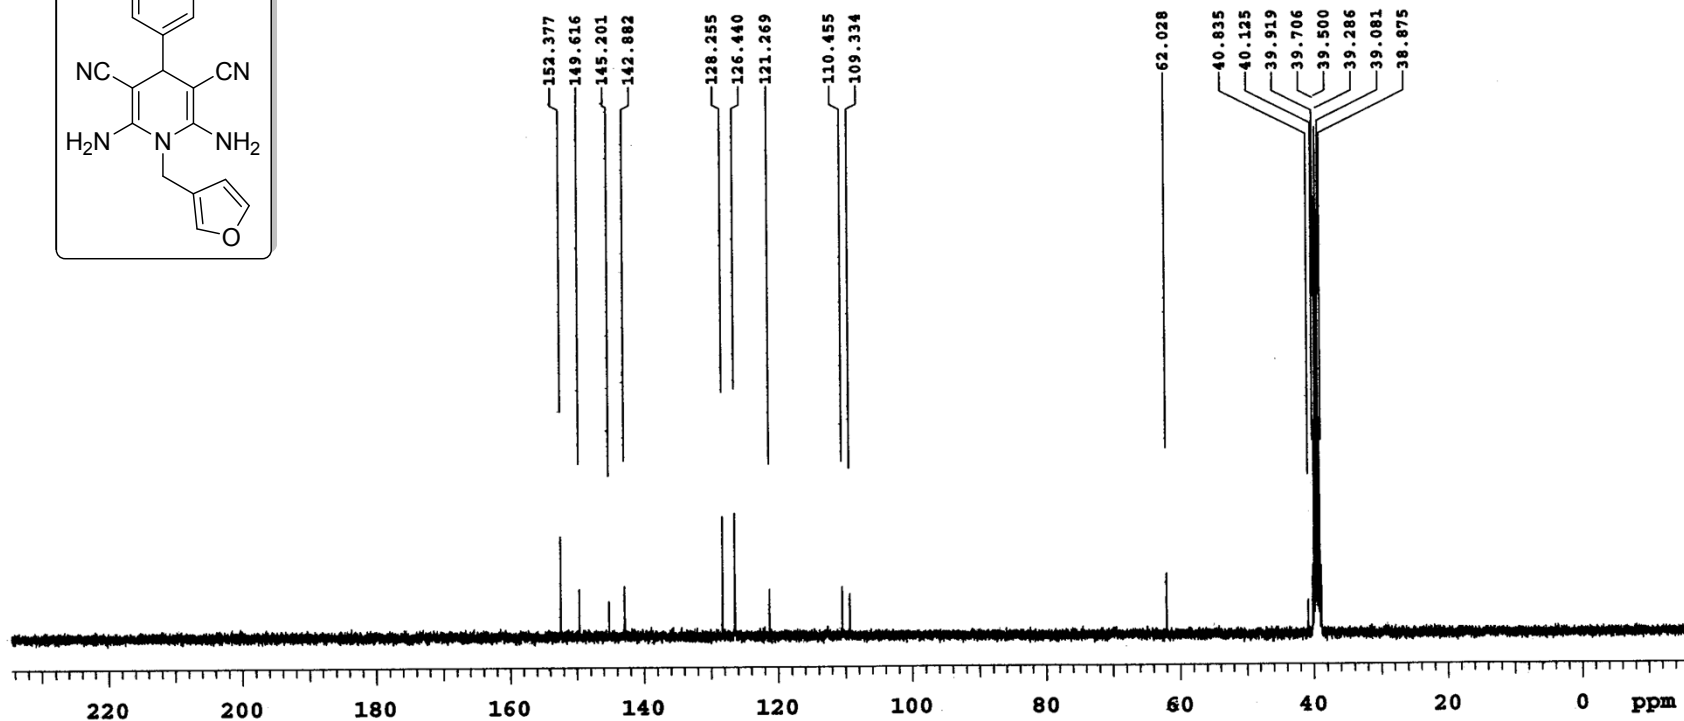

|                                                                                                                                                                   |                                                                                                                      |                                                                                                    |                                                                                                                                                           |
|-------------------------------------------------------------------------------------------------------------------------------------------------------------------|----------------------------------------------------------------------------------------------------------------------|----------------------------------------------------------------------------------------------------|-----------------------------------------------------------------------------------------------------------------------------------------------------------|
| <b>SEQUENCE</b> DATA PROCESSING<br>Ref: 65536<br>Delay 1.000 sec<br>Pulse 45.0 degree<br>Acq. time 1.304 sec<br>Width 25125.6 Hz<br>322 repetitions<br>"IITG-NMR" | <b>OBSERVE-FILE</b> 130.5431293<br>DECOUPLE H1, 399.8548987<br>Power: 20 dB<br>continuously on<br>WALTZ-16 modulated | <b>DATA PROCESSING</b> VIEW: F<br>Line broadening 0.5 Hz<br>FT size 65536<br>Total time 38 minutes | <b>SS-Ph-File</b> PROCESSING OBSERVE<br>Solvent: dms<br>65536<br>Temp. 25.0 C / 298.15 K<br>Operator: chem<br>File: SS-Ph-F-13C<br>Mercury-400 "IITG-NMR" |
|-------------------------------------------------------------------------------------------------------------------------------------------------------------------|----------------------------------------------------------------------------------------------------------------------|----------------------------------------------------------------------------------------------------|-----------------------------------------------------------------------------------------------------------------------------------------------------------|

HRMS-spectra of compound 6g

|                      |             |                    |             |                        |                                   |                               |             |
|----------------------|-------------|--------------------|-------------|------------------------|-----------------------------------|-------------------------------|-------------|
| <b>Sample Name</b>   | Unavailable | <b>Position</b>    | Unavailable | <b>Instrument Name</b> | Unavailable                       | <b>User Name</b>              | Unavailable |
| <b>Inj Vol</b>       | Unavailable | <b>InjPosition</b> | Unavailable | <b>SampleType</b>      | Unavailable                       | <b>IRM Calibration Status</b> | Success     |
| <b>Data Filename</b> |             | <b>ACQ Method</b>  |             | <b>Comment</b>         | Sample information is unavailable | <b>Acquired Time</b>          | Unavailable |

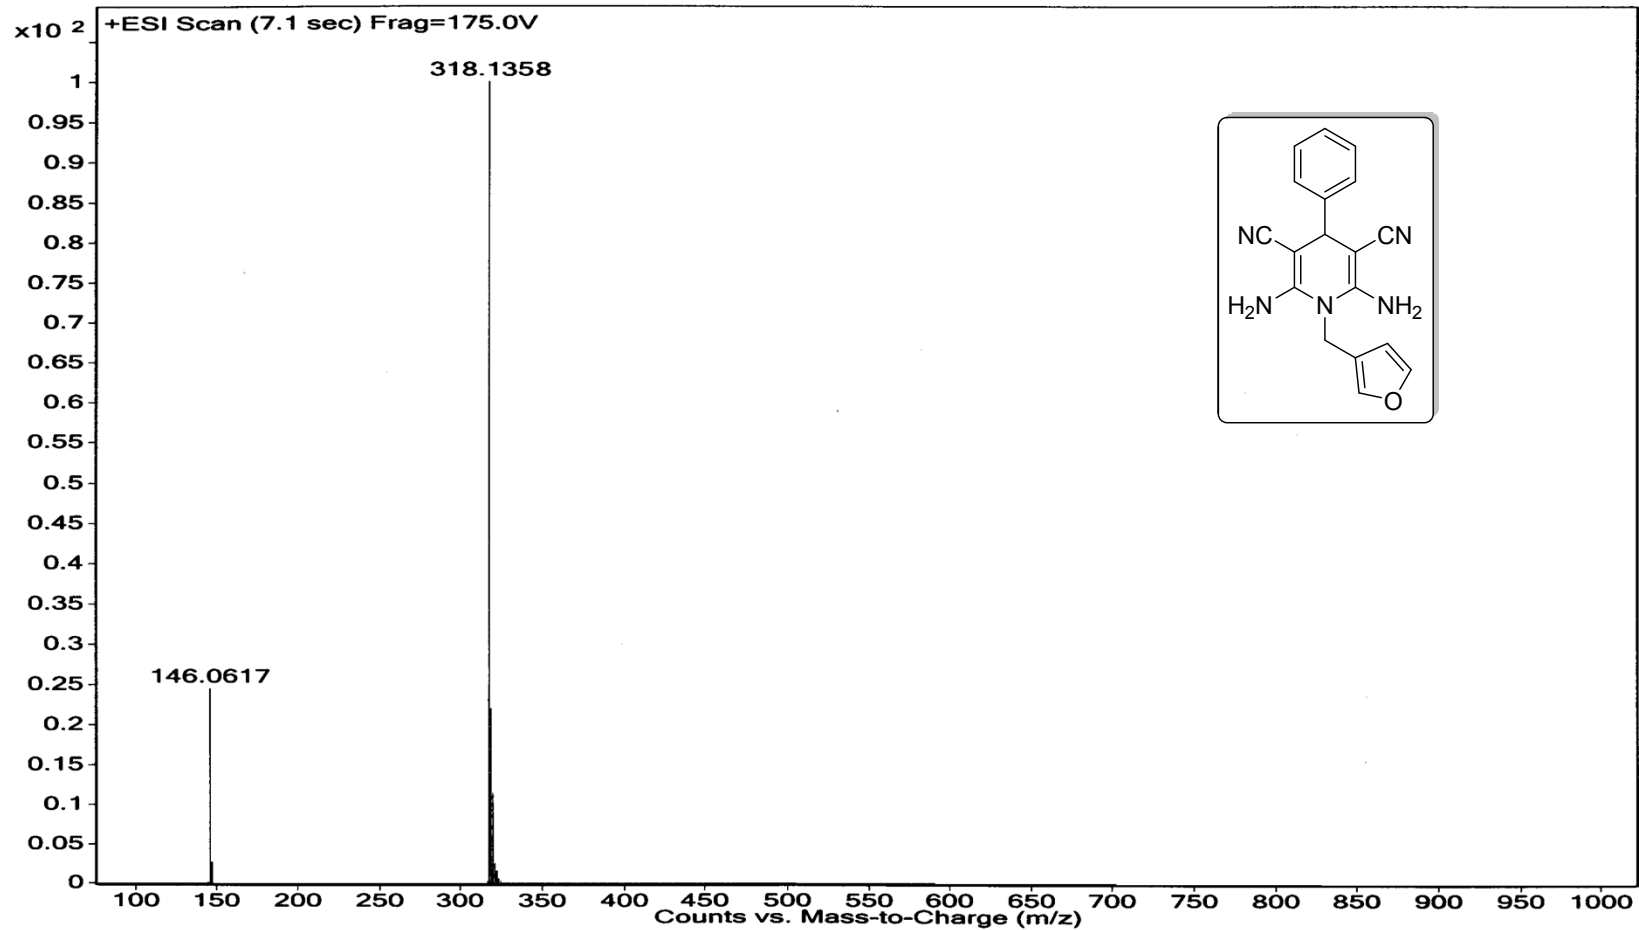

<sup>1</sup>H-NMR spectra of compound 6h

SS-4OMe-fur-1H

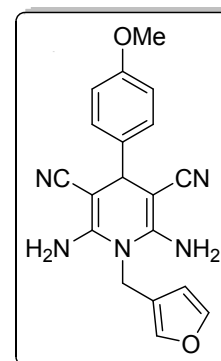

Current Data Parameters  
NAME SS-4OMe-fur-1H  
EXPNO 1  
PROCNO 1

F2 - Acquisition Parameters  
Date\_ 20131125  
Time 9.07  
INSTRUM spect  
PROBHD 5 mm PABBO BB/  
PULPROG zg30  
TD 32768  
SOLVENT DMSO  
NS 16  
DS 2  
SWH 12019.230 Hz  
FIDRES 0.366798 Hz  
AQ 1.3631488 sec  
RG 54.94  
DW 41.600 usec  
DE 6.50 usec  
TE 297.4 K  
D1 1.00000000 sec  
TDO 1

===== CHANNEL f1 =====  
SFO1 600.1737063 MHz  
NUC1 1H  
P1 12.00 usec  
PLW1 21.00000000 W

F2 - Processing parameters  
SI 16384  
SF 600.1700048 MHz  
WDW EM  
SSB 0  
LB 0.30 Hz  
GB 0  
FC 1.00

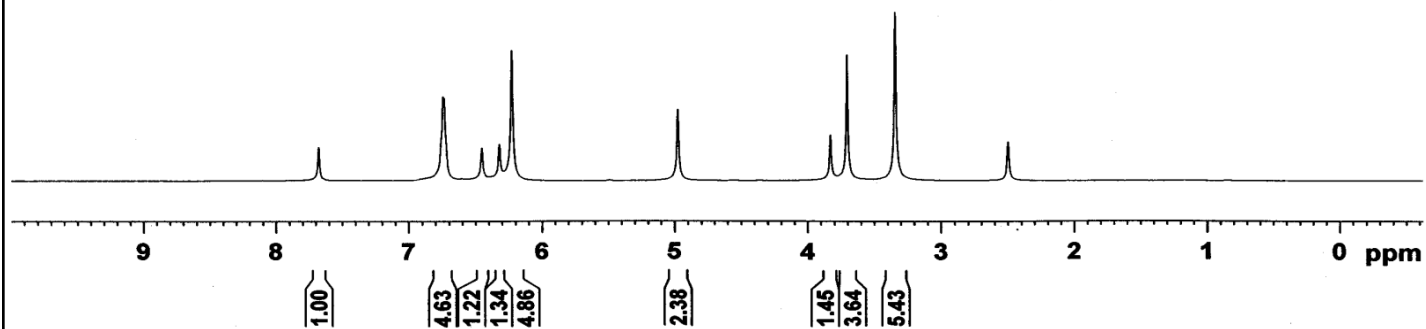

<sup>13</sup>C-NMR spectra of compound 6h

SS-4OMe-Fur-13C

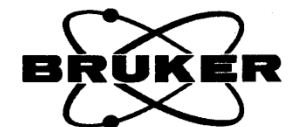

157.93  
152.20  
149.66  
142.97  
137.43  
127.52  
121.35  
113.66  
110.50  
109.31

62.45  
55.03  
40.87  
39.93  
39.79  
39.66  
39.52  
39.38  
39.24  
39.10  
38.94

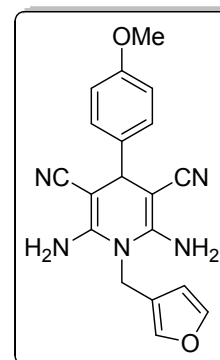

Current Data Parameters  
NAME SS-4OMe-Fur-13C  
EXPNO 1  
PROCNO 1

F2 - Acquisition Parameters  
Date\_ 20131125  
Time 9.14  
INSTRUM spect  
PROBHD 5 mm PABBO BB/  
PULPROG zgpg30  
TD 32768  
SOLVENT DMSO  
NS 135  
DS 2  
SWH 36057.691 Hz  
FIDRES 1.100393 Hz  
AQ 0.4543829 sec  
RG 65.24  
DW 13.867 usec  
DE 6.50 usec  
TE 297.6 K  
D1 2.0000000 sec  
D11 0.0300000 sec  
TDO 1

===== CHANNEL f1 =====  
SFO1 150.9279571 MHz  
NUC1 13C  
P1 10.50 usec  
PLW1 95.0000000 W

===== CHANNEL f2 =====  
SFO2 600.1724007 MHz  
NUC2 1H  
CPDPRG[2] waltz16  
PCPD2 70.00 usec  
PLW2 21.0000000 W  
PLW12 0.61714000 W  
PLW13 0.30239999 W

F2 - Processing parameters  
SI 16384  
SF 150.9129365 MHz  
WDW EM  
SSB 0  
LB 1.00 Hz  
GB 0  
PC 1.40

210 200 190 180 170 160 150 140 130 120 110 100 90 80 70 60 50 40 30 20 10 0 ppm

HRMS-spectra of compound 6h



|                      |                 |                    |    |                        |              |                               |                       |
|----------------------|-----------------|--------------------|----|------------------------|--------------|-------------------------------|-----------------------|
| <b>Sample Name</b>   | SS-4-OME-FURN   | <b>Position</b>    | -1 | <b>Instrument Name</b> | Instrument 1 | <b>User Name</b>              |                       |
| <b>Inj Vol</b>       | -10             | <b>InjPosition</b> |    | <b>SampleType</b>      | Sample       | <b>IRM Calibration Status</b> | Success               |
| <b>Data Filename</b> | SS-4-OME-FURN.d | <b>ACQ Method</b>  |    | <b>Comment</b>         |              | <b>Acquired Time</b>          | 4/10/2014 11:36:21 AM |

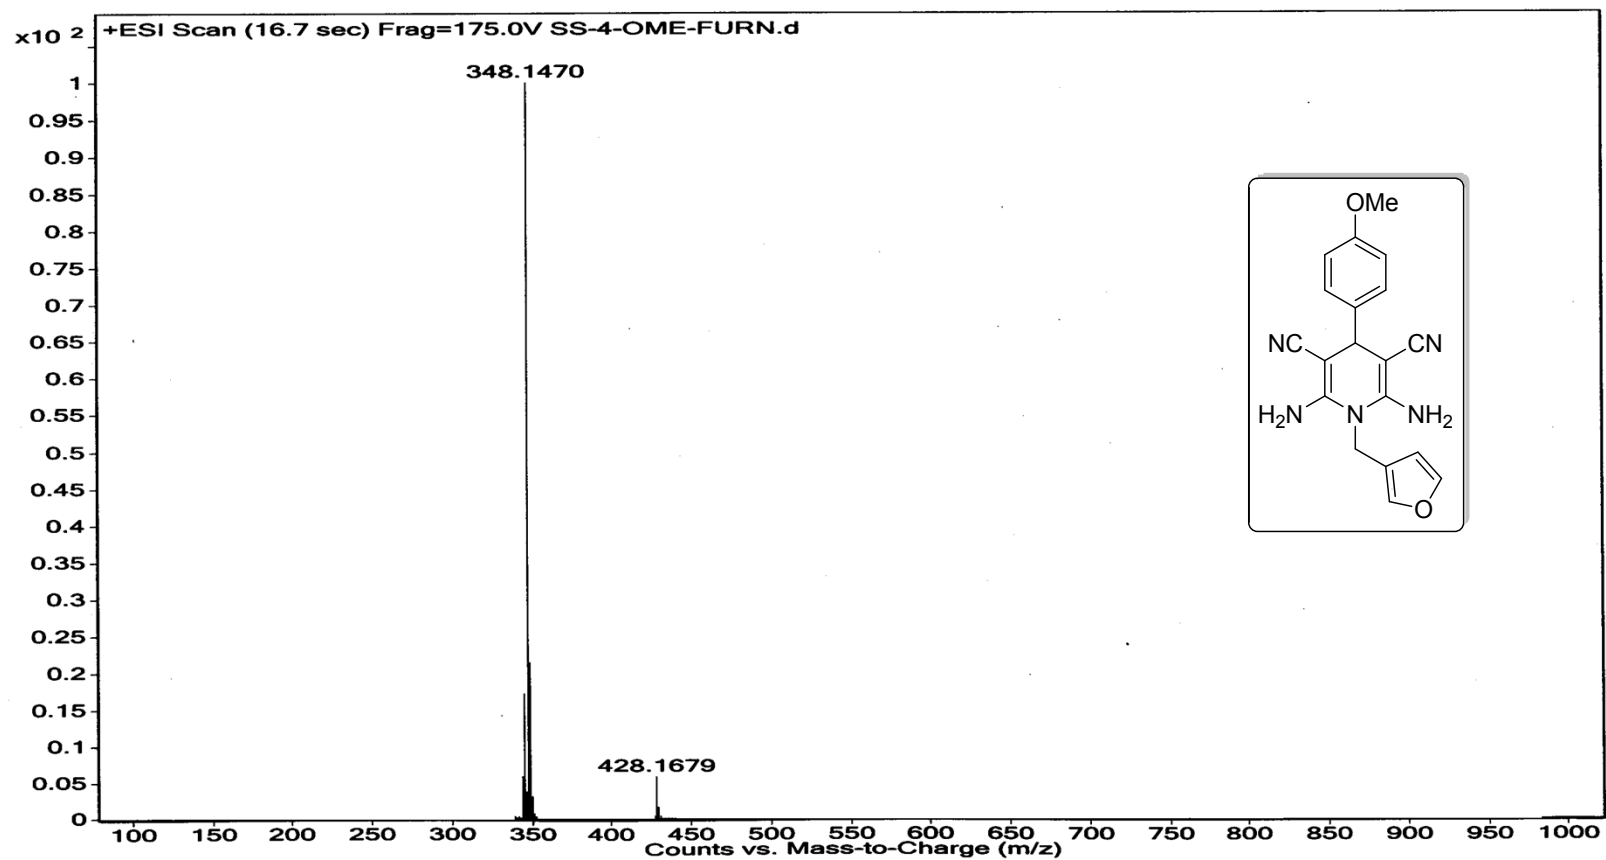

<sup>1</sup>H-NMR spectra of compound **6i**

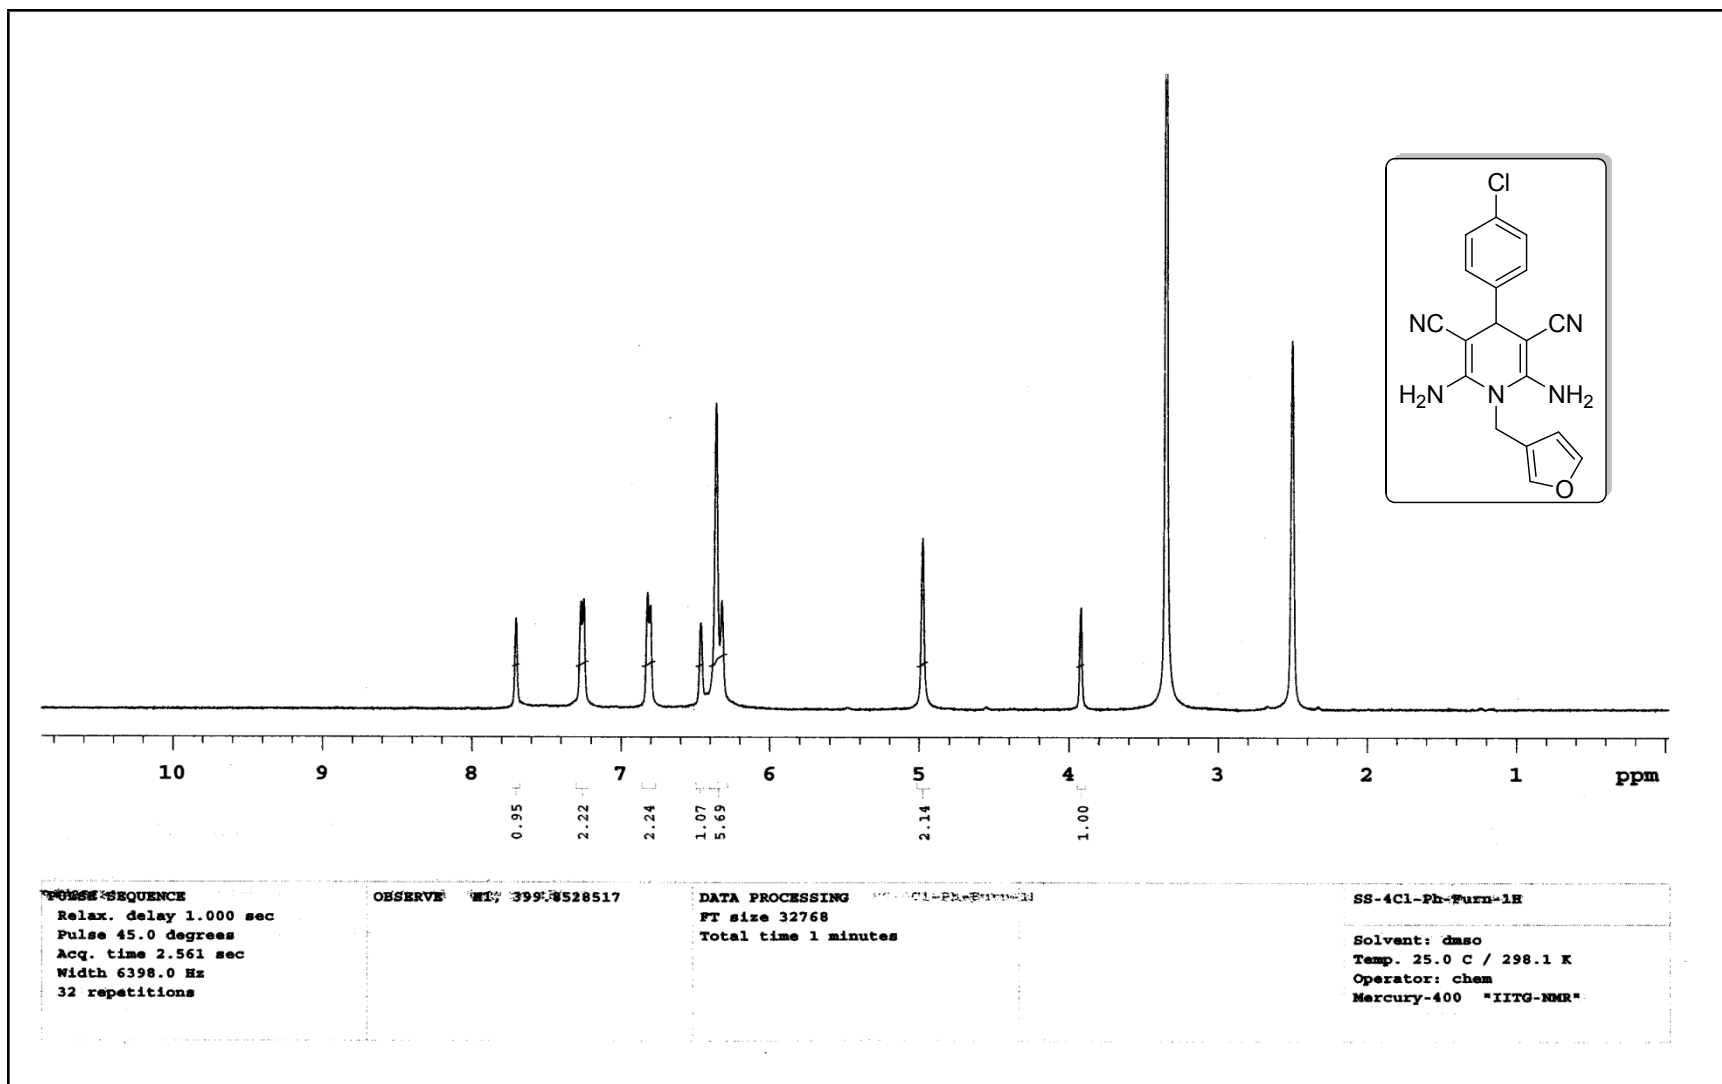

<sup>13</sup>C-NMR spectra of compound 6i

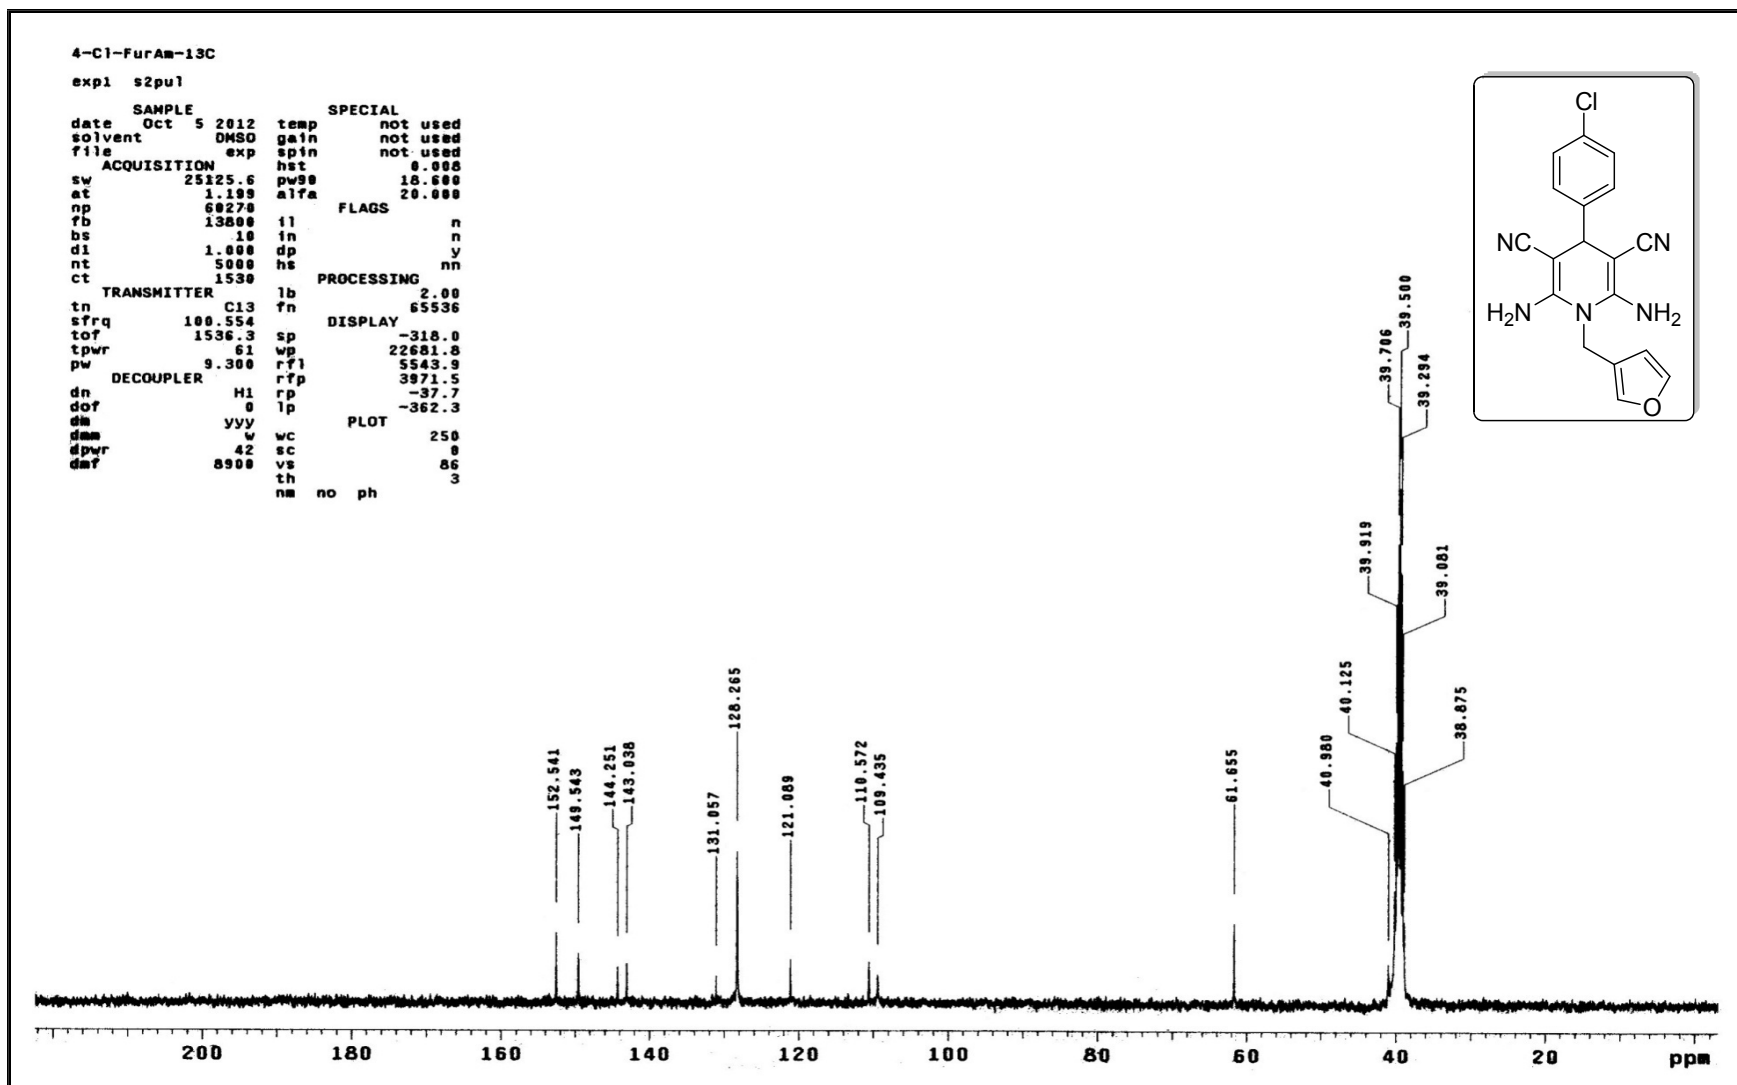

HRMS-spectra of compound 6i

|               |               |             |    |                 |              |                        |                       |
|---------------|---------------|-------------|----|-----------------|--------------|------------------------|-----------------------|
| Sample Name   | SS-4Cl-FURN   | Position    | -1 | Instrument Name | Instrument 1 | User Name              |                       |
| Inj Vol       | -10           | InjPosition |    | SampleType      | Sample       | IRM Calibration Status | Success               |
| Data Filename | SS-4Cl-FURN.d | ACQ Method  |    | Comment         |              | Acquired Time          | 3/24/2014 12:05:16 PM |

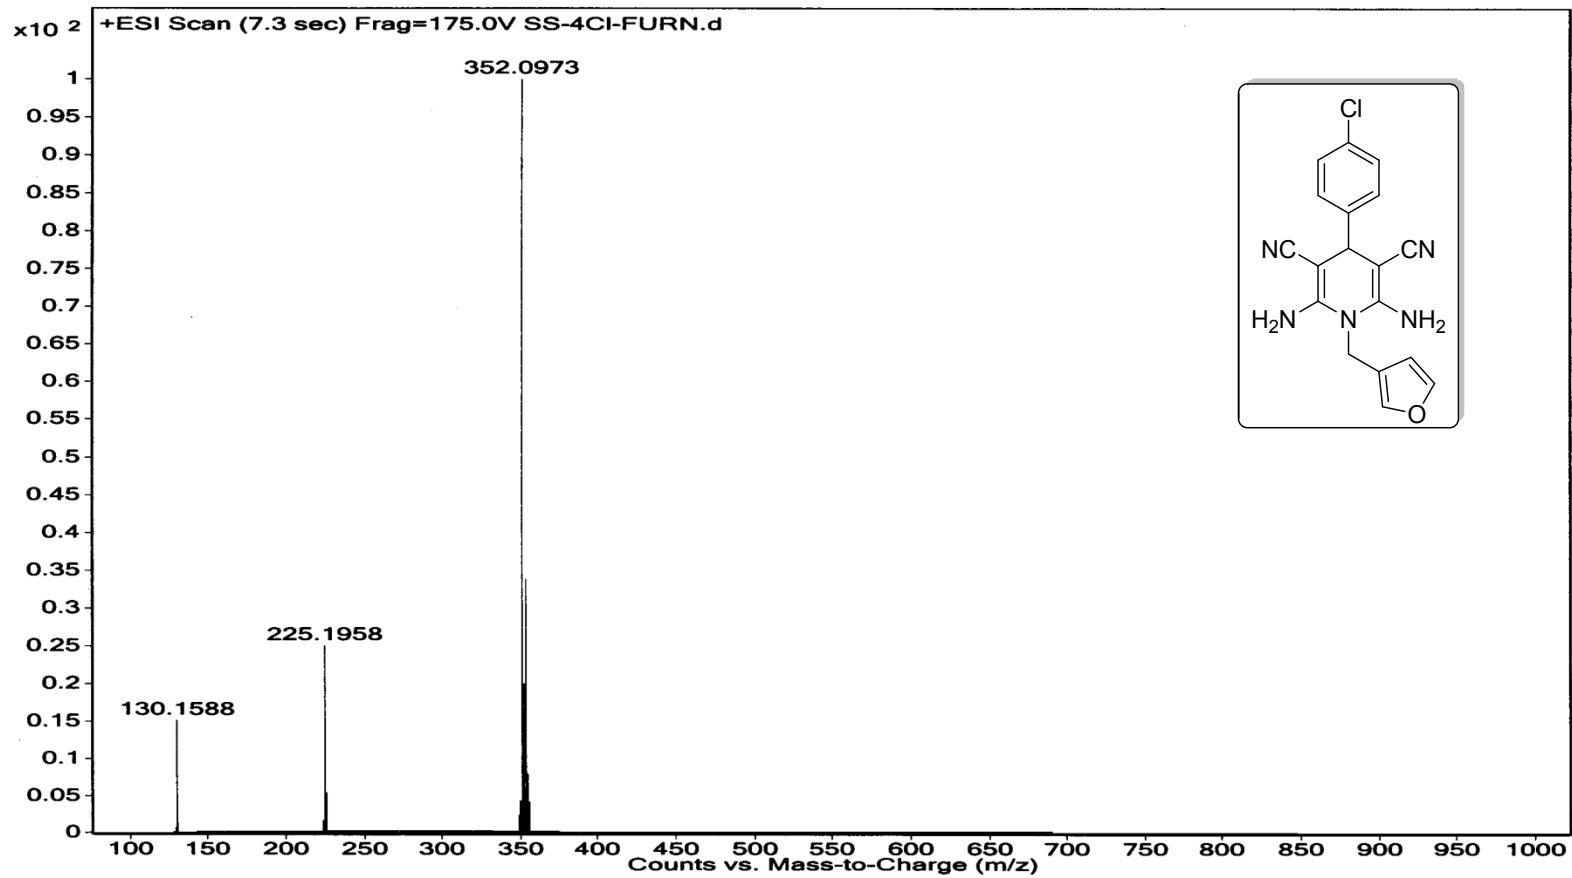

<sup>1</sup>H-NMR spectra of compound **6j**

SS-4Br-FUR-NH2-1H

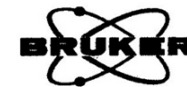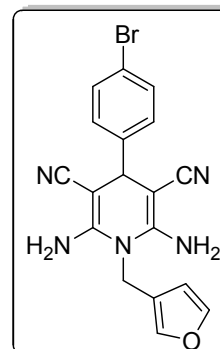

Current Data Parameters  
NAME SS-4Br-FUR-NH2-1H  
EXPNO 1  
PROCNO 1

F2 - Acquisition Parameters  
Date 20131031  
Time 11.19  
INSTRUM spect  
PROBHD 5 mm PABBO BB/  
PULPROG zg30  
TD 32768  
SOLVENT DMSO  
NS 16  
DS 2  
SWH 12019.230 Hz  
FIDRES 0.366798 Hz  
AQ 1.3631488 sec  
RG 113  
DW 41.600 usec  
DE 6.50 usec  
TE 297.6 K  
D1 1.00000000 sec  
TDO 1

CHANNEL f1  
SF01 600.1737063 MHz  
NUC1 1H  
P1 12.00 usec  
PLW1 21.00000000 W

F2 - Processing parameters  
SI 16384  
SF 600.1700051 MHz  
WDW EM  
SSB 0  
LB 0.30 Hz  
GB 0  
PC 1.00

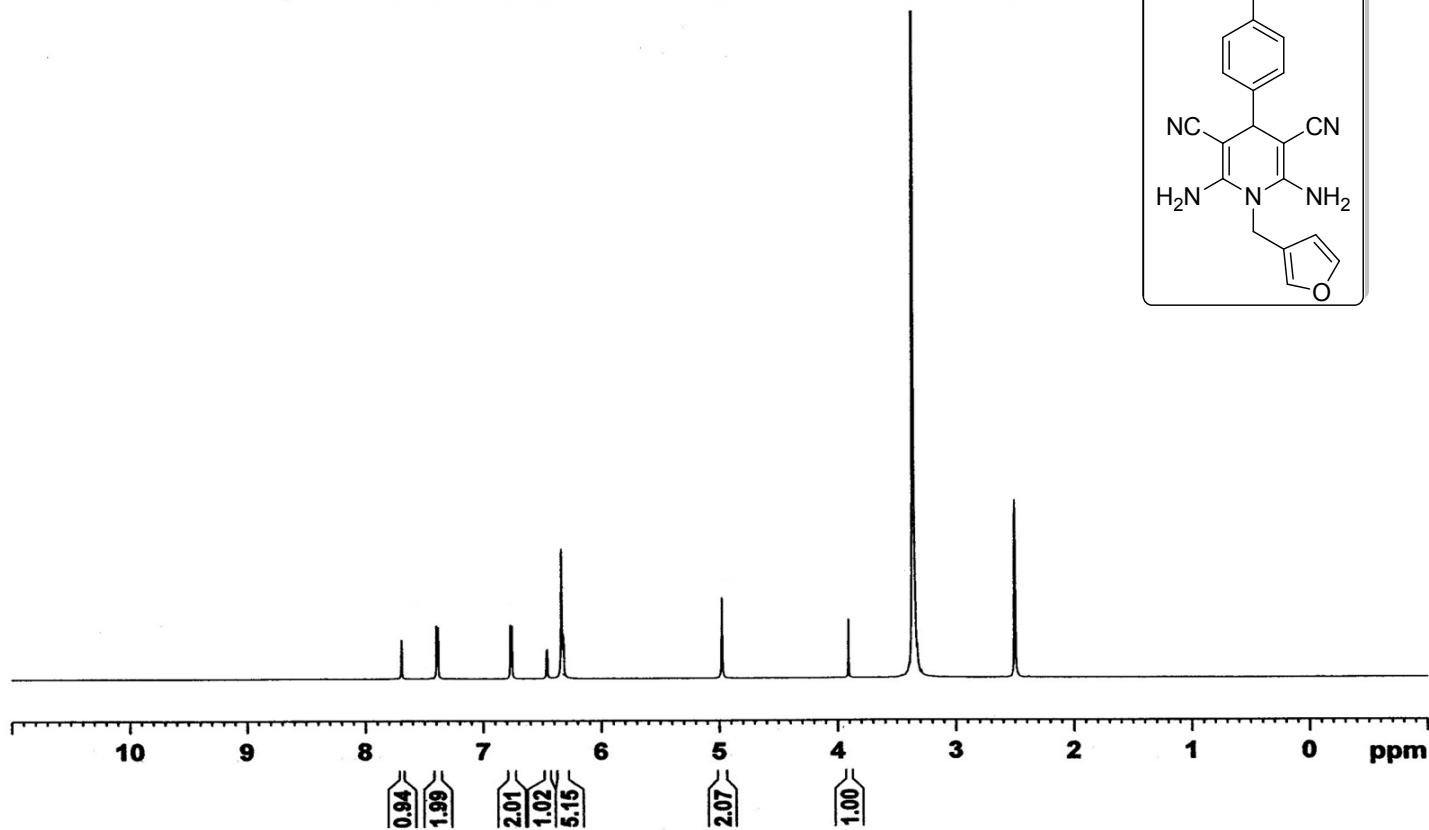

<sup>13</sup>C-NMR spectra of compound 6j

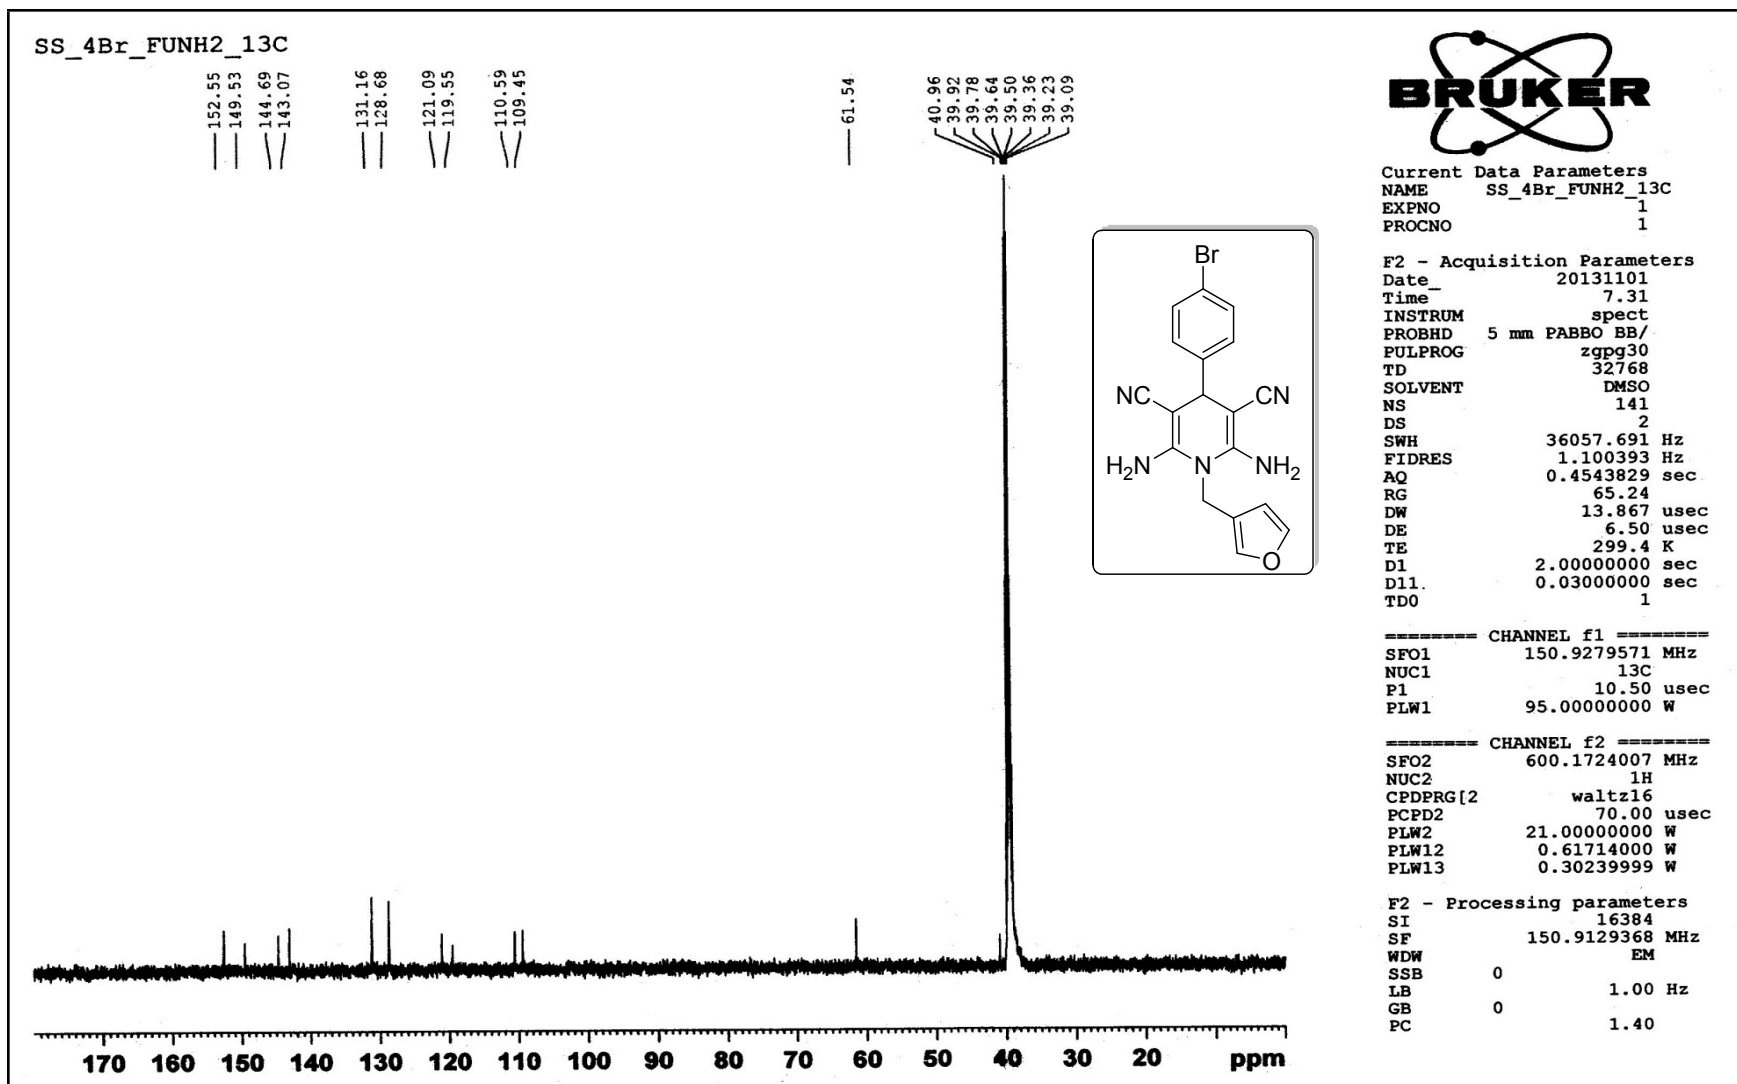

HRMS-spectra of compound 6j

|                      |               |                    |             |                        |                                   |                               |             |
|----------------------|---------------|--------------------|-------------|------------------------|-----------------------------------|-------------------------------|-------------|
| <b>Sample Name</b>   | Unavailable   | <b>Position</b>    | Unavailable | <b>Instrument Name</b> | Unavailable                       | <b>User Name</b>              | Unavailable |
| <b>Inj Vol</b>       | Unavailable   | <b>InjPosition</b> | Unavailable | <b>SampleType</b>      | Unavailable                       | <b>IRM Calibration Status</b> | Success     |
| <b>Data Filename</b> | SS-4BR-FURN.d | <b>ACQ Method</b>  |             | <b>Comment</b>         | Sample information is unavailable | <b>Acquired Time</b>          | Unavailable |

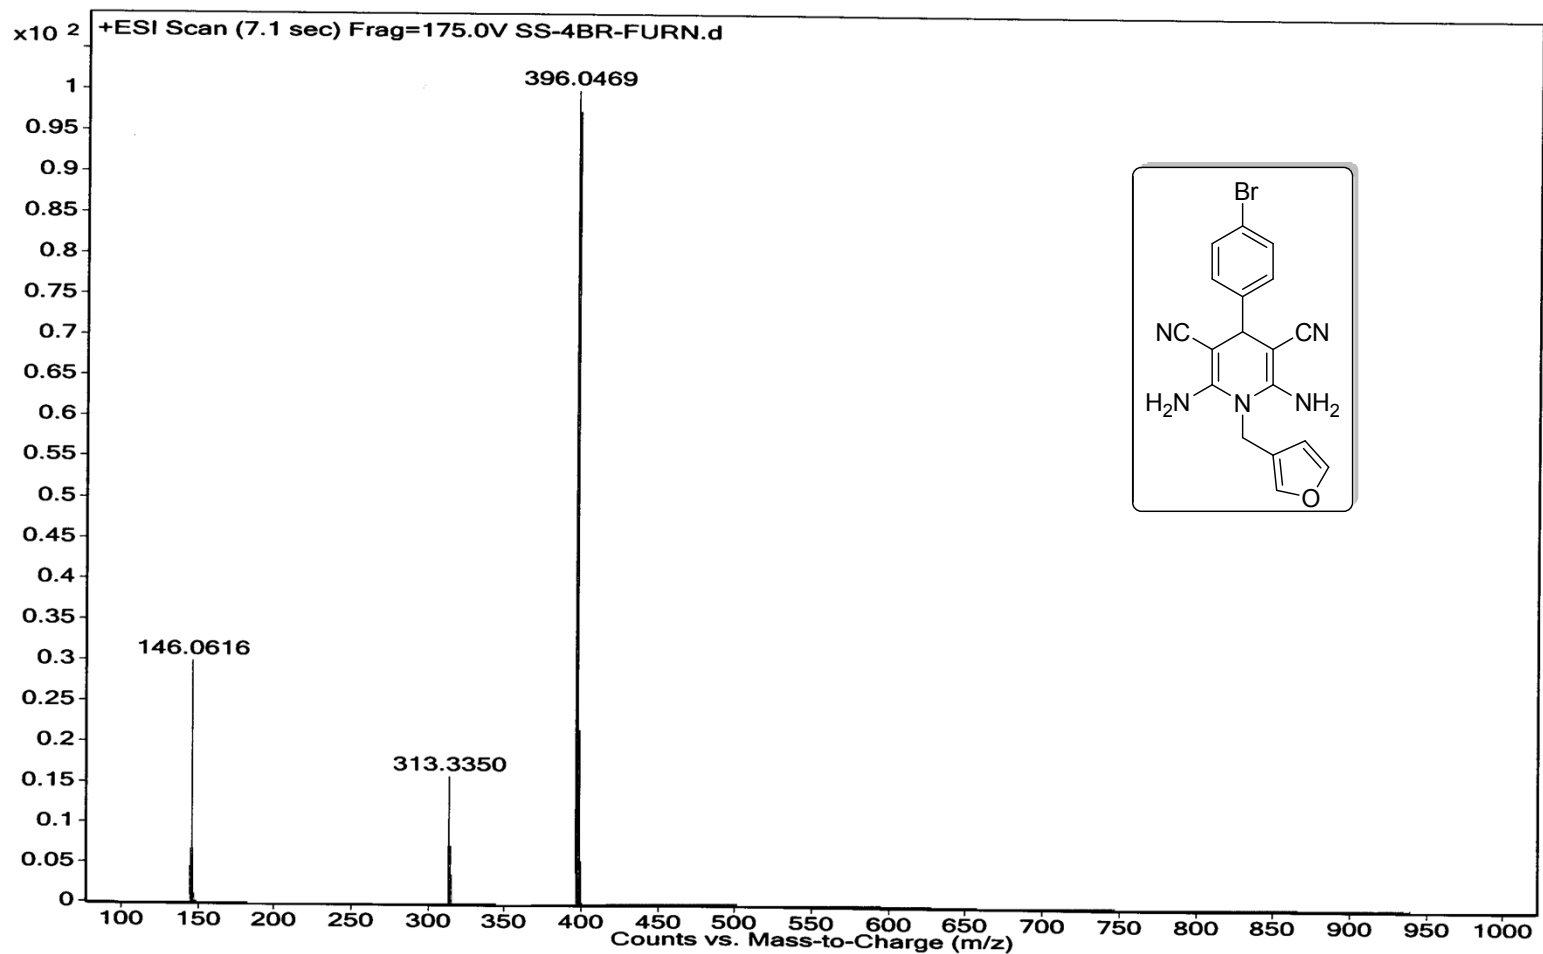

Supplement: c4ra08237k1.pdf [file c4ra08237k1.pdf]
